# Supplementary material for: Pancancer analysis of DNA methylation-driven genes using MethylMix
Source: PubMed Central journal article supplement (PMC4365533; doi:10.1186/s13059-014-0579-8), 2015-01-29

## **Additional File 1**

### **Supplementary Figure legends**

Supplementary Figure 1: Workflow of MethylMix. The steps (i), (ii) and (iii) refer to the different steps of MethylMix to transform the raw methylation data into transcriptionally predictive and differentially methylated genes. Panels (A) through (D) illustrate how steps (i) thru (iii) affect the methylation data.

Supplementary Figure 2: PAM model centroids for the colon cancer (COAD) methylation subgroups showing extensive hypermethylation for subgroup 2, the COAD-CIMP methylation subgroup, based on positive weights for the majority of genes. Only the top 100 genes are shown.

Supplementary Figure 3: PAM model centroids for the glioblastoma (GBM) methylation subgroups showing extensive hypermethylation for subgroup 3, the GBM-CIMP methylation subgroup, based on positive weights for the majority of genes. Only the top 100 genes are shown.

Supplementary Figure 4: PAM model centroids for the acute myeloid leukemia (LAML) methylation subgroups showing extensive hypermethylation for subgroup 1, the LAML-CIMP methylation subgroup, based on positive weights for the majority of genes. Only the top 100 genes are shown.

Supplementary Figure 5: Breast cancer (BRCA) methylation clustering. Top panel: consensus clustering in five subgroup, middle panel: correlation with the intrinsic subtypes, bottom panel: corresponding methylation profiles with red=hypermethylation, white=normal methylation and blue=hypomethylation.

Supplementary Figure 6: Comparison between DM-value clustering and beta-value clustering for COAD, LAML and GBM. Top panel: DM-value clusters for each cancer site. Top middle panel: gold standard clinical data for CIMP clusters for each cancer site. Bottom middle panel: RPMM clustering based on the beta-values. CIMP cluster comparison has been highlighted with gray transparent boxes showing heterogeneity for the CIMP clusters in the RPMM clustering. Bottom panel: corresponding methylation profiles with red=hypermethylation, white=normal methylation and blue=hypomethylation.

Supplementary Figure 7: Comparison between DM-value clustering and gene expression clustering for COAD, LAML and GBM. Top panel: DM-value clusters for each cancer site. The CIMP clusters has been indicated at the top. Middle panel: gene expression clustering based. Bottom panel: corresponding methylation profiles with red=hypermethylation, white=normal methylation and blue=hypomethylation.

Supplementary Figure 8: PAM model centroids for the endometrial carcinoma (UCEC) methylation subgroups showing extensive hypermethylation for subgroup 1, a putative UCEC-CIMP methylation subgroup, based on positive weights for the majority of genes. Only the top 100 genes are shown.

Supplementary Figure 9: Workflow of the MethylMix application to pancancer data. First MethylMix is applied on all normal samples combined to identify genes that are unimodal. Next, MethylMix is run on the combined cancer methylation data only on unimodal genes. This results in pancancer methylation states and their associated DM values.

Supplementary Figure 10: Pancancer methylation clustering with association to the top 30 mutated genes after removing 115 long genes (>10kb). Top panel: consensus clustering in ten subgroups, middle panel mutation status for the top 30 mutated genes. Bottom panel: corresponding methylation profiles with red=hypermethylation, white=normal methylation and blue=hypomethylation.

Supplementary Figure 11: Pancancer methylation clustering survival analysis. Overall survival for all pancancer clusters in days.

Supplementary Figure 12: Comparison between the pancancer DM-value methylation clustering and a pancancer mutation clustering. Top panel: consensus clustering in ten subgroups, bottom panel TCGA mutation based pancancer clusters.

Supplementary Figure 13: Comparison between the pancancer DM-value methylation clustering and a pancancer copy number clustering. Top panel: consensus clustering in ten subgroups, bottom panel TCGA copy number based pancancer clusters.

Supplementary Figure 14: Comparison between the pancancer DM-value methylation clustering and a pancancer gene expression clustering. Top panel: consensus clustering in ten subgroups, bottom panel TCGA gene expression clustering based pancancer clusters. The four mixed tissue pancancer clusters are highlighted to show the lack of correspondence between these clusters and the gene expression clustering.

Supplementary Figure 15: Comparison between the pancancer DM-value methylation clustering and a pancancer meta-clustering. Top panel: consensus clustering in ten subgroups, bottom panel TCGA meta clustering based pancancer clusters. The four mixed tissue pancancer clusters are highlighted to show the lack of correspondence between these clusters and the meta clustering.

For each CpG site

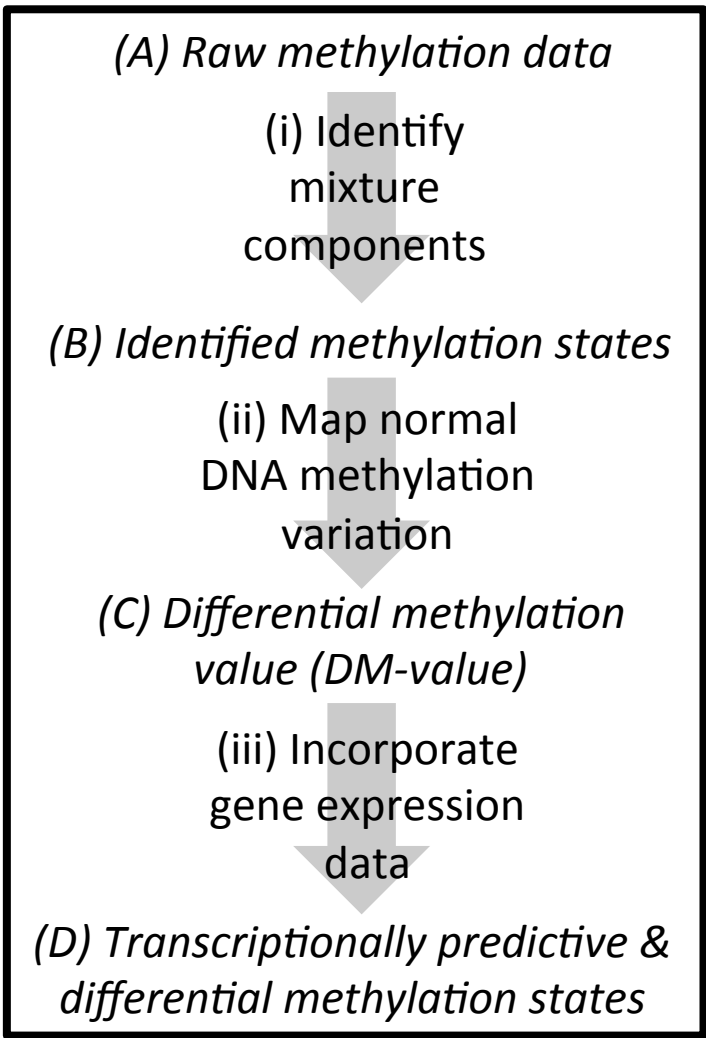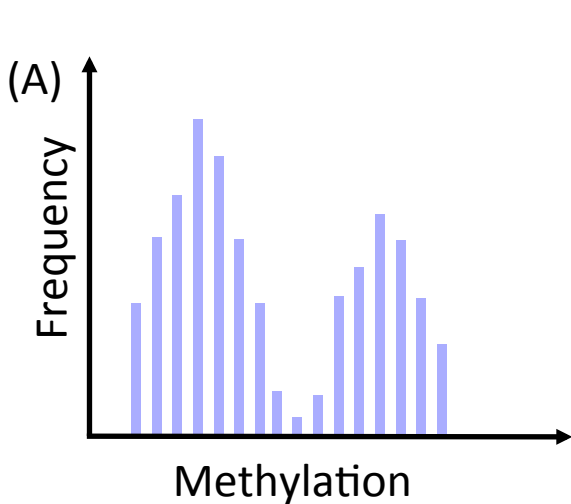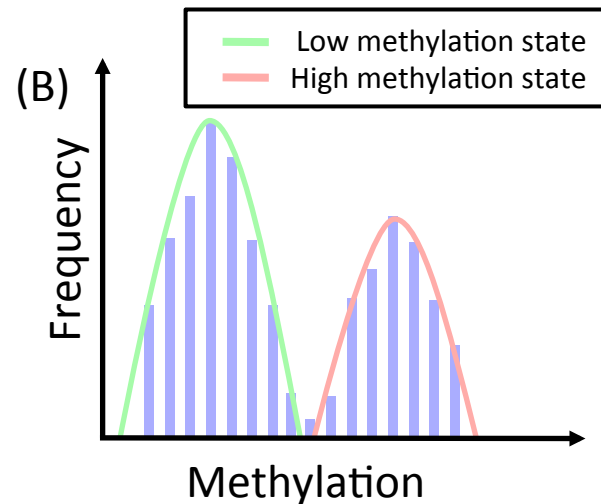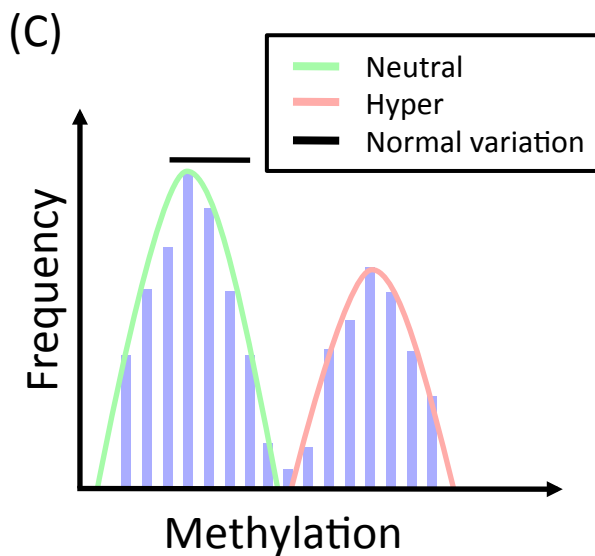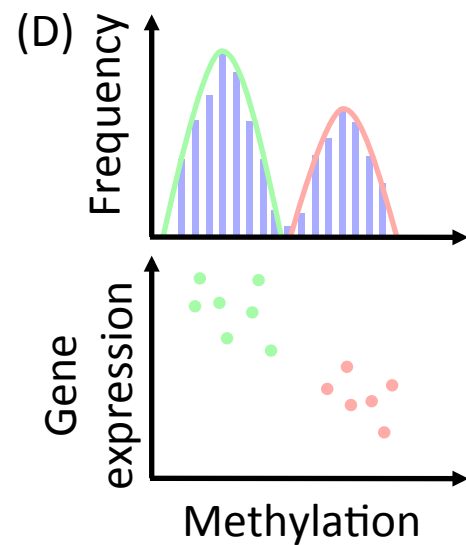

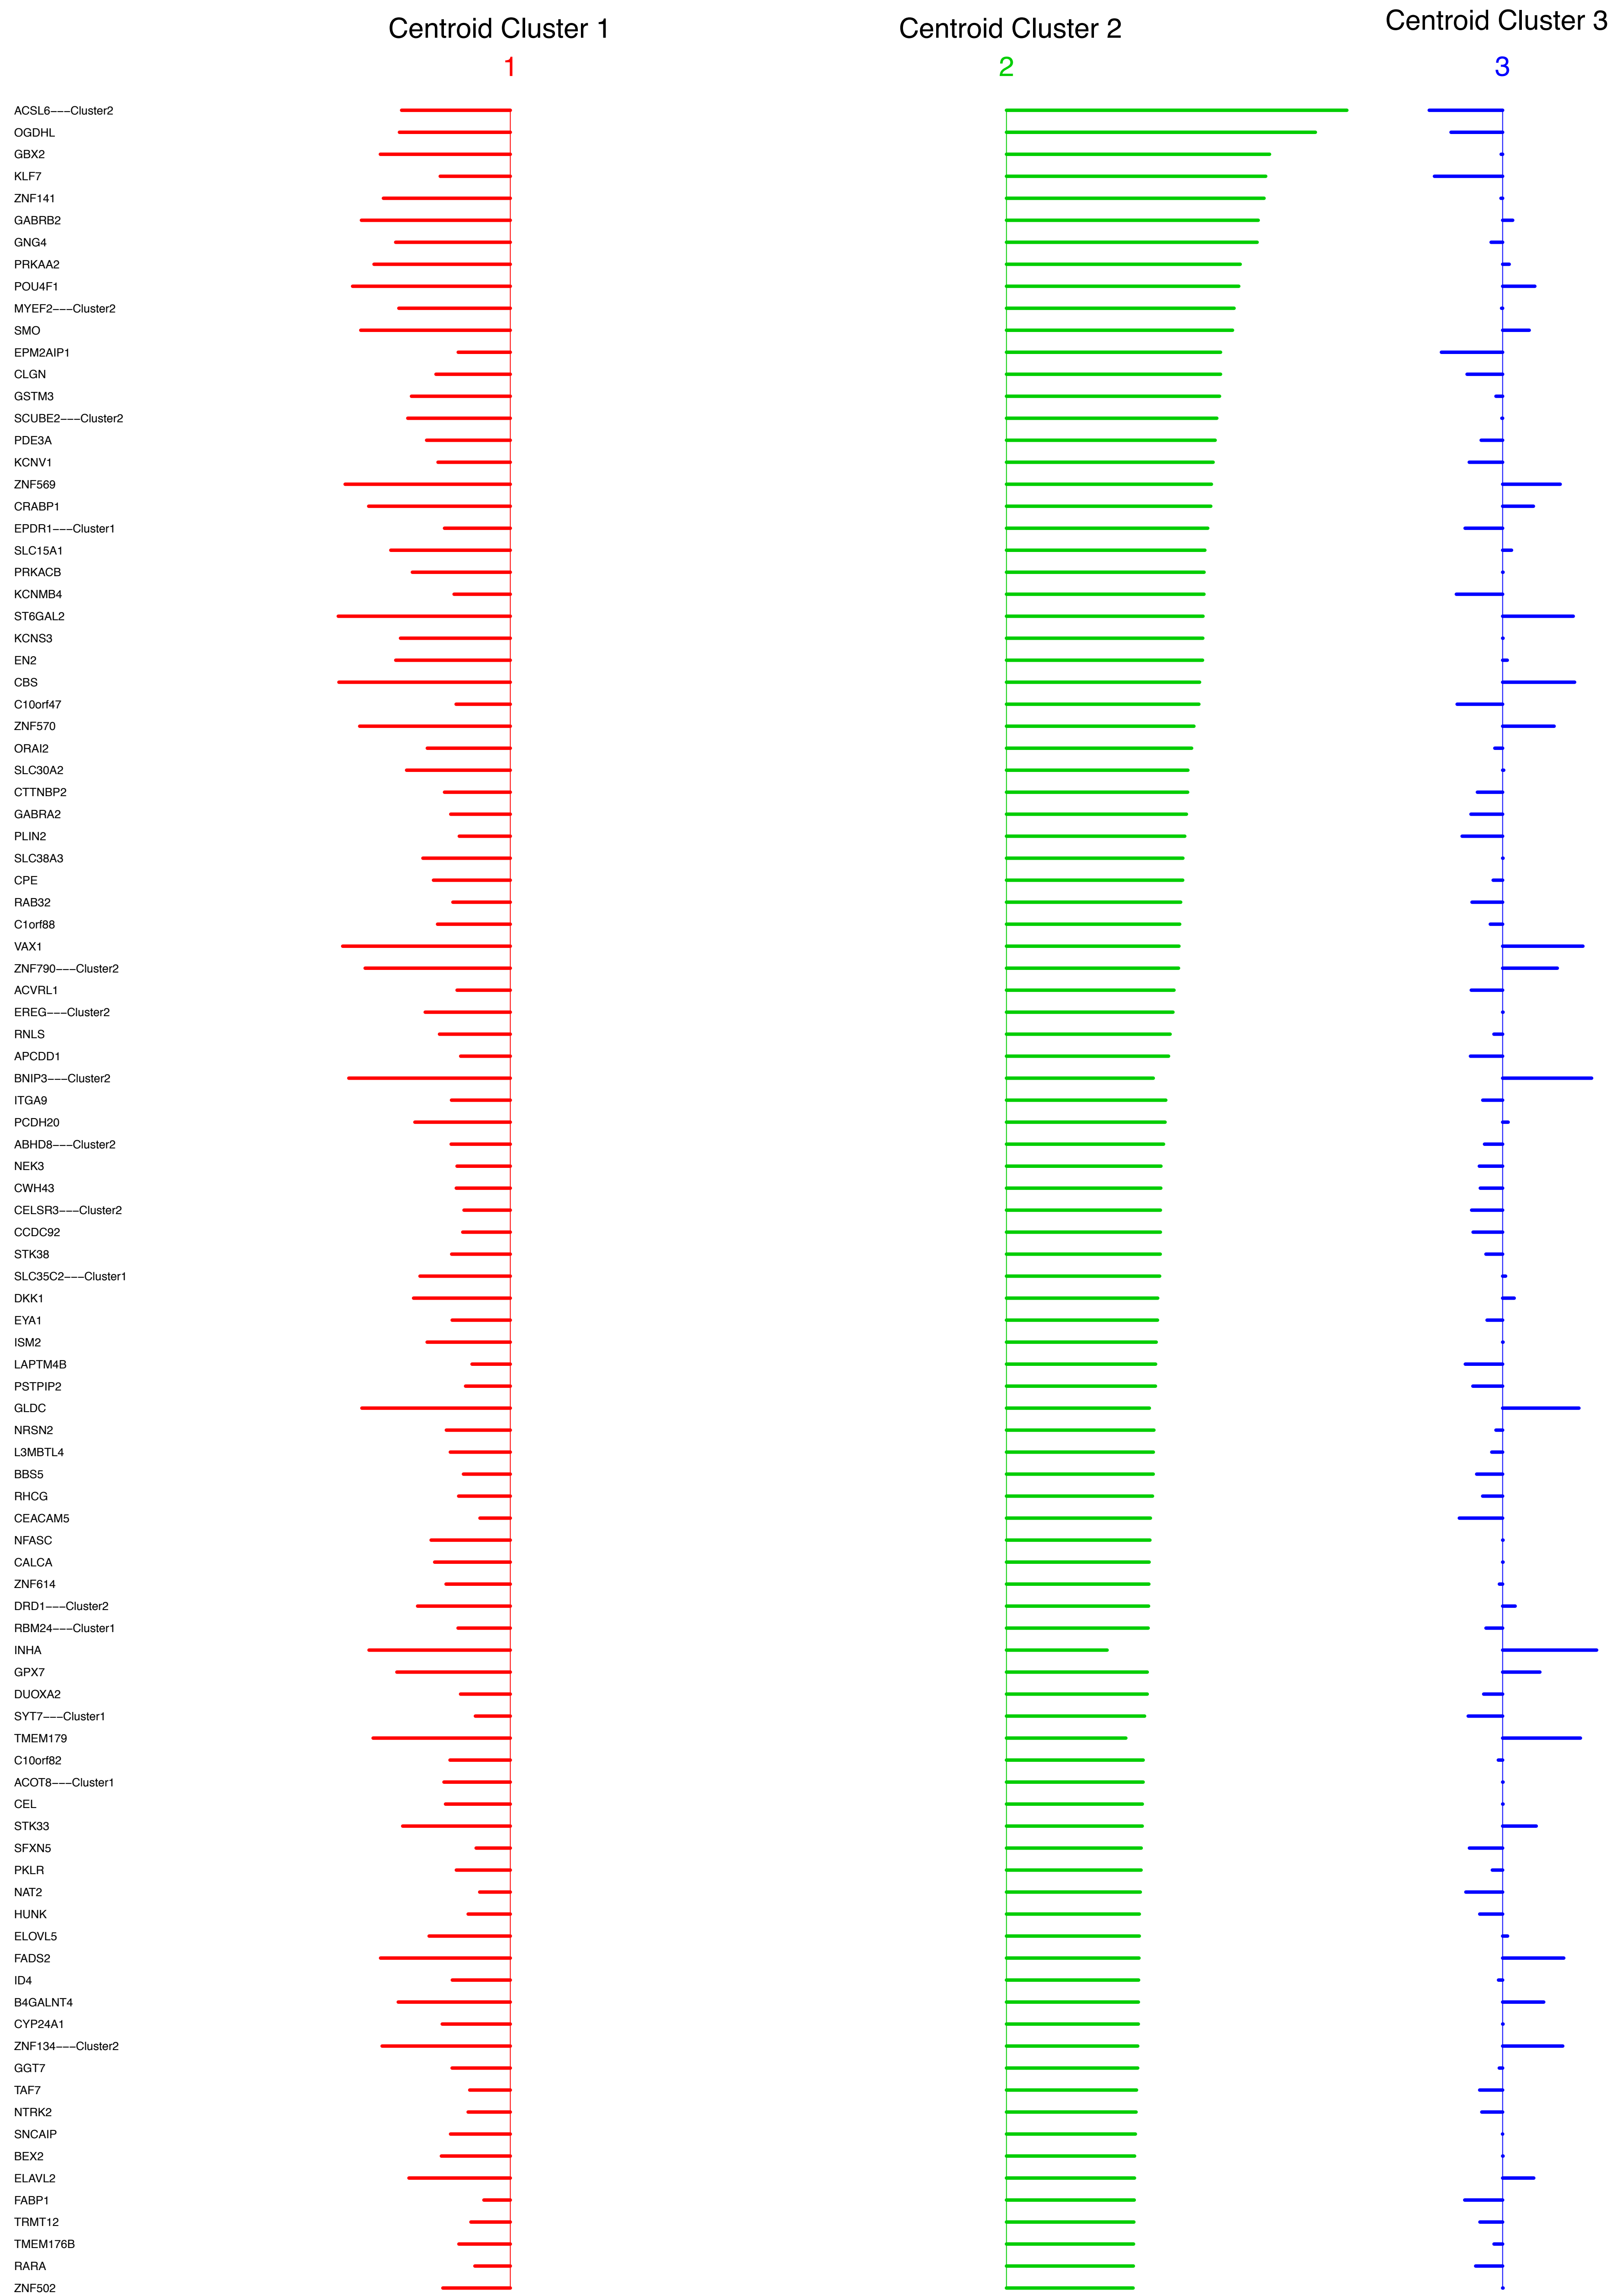

Supplementary Figure 3

GBM

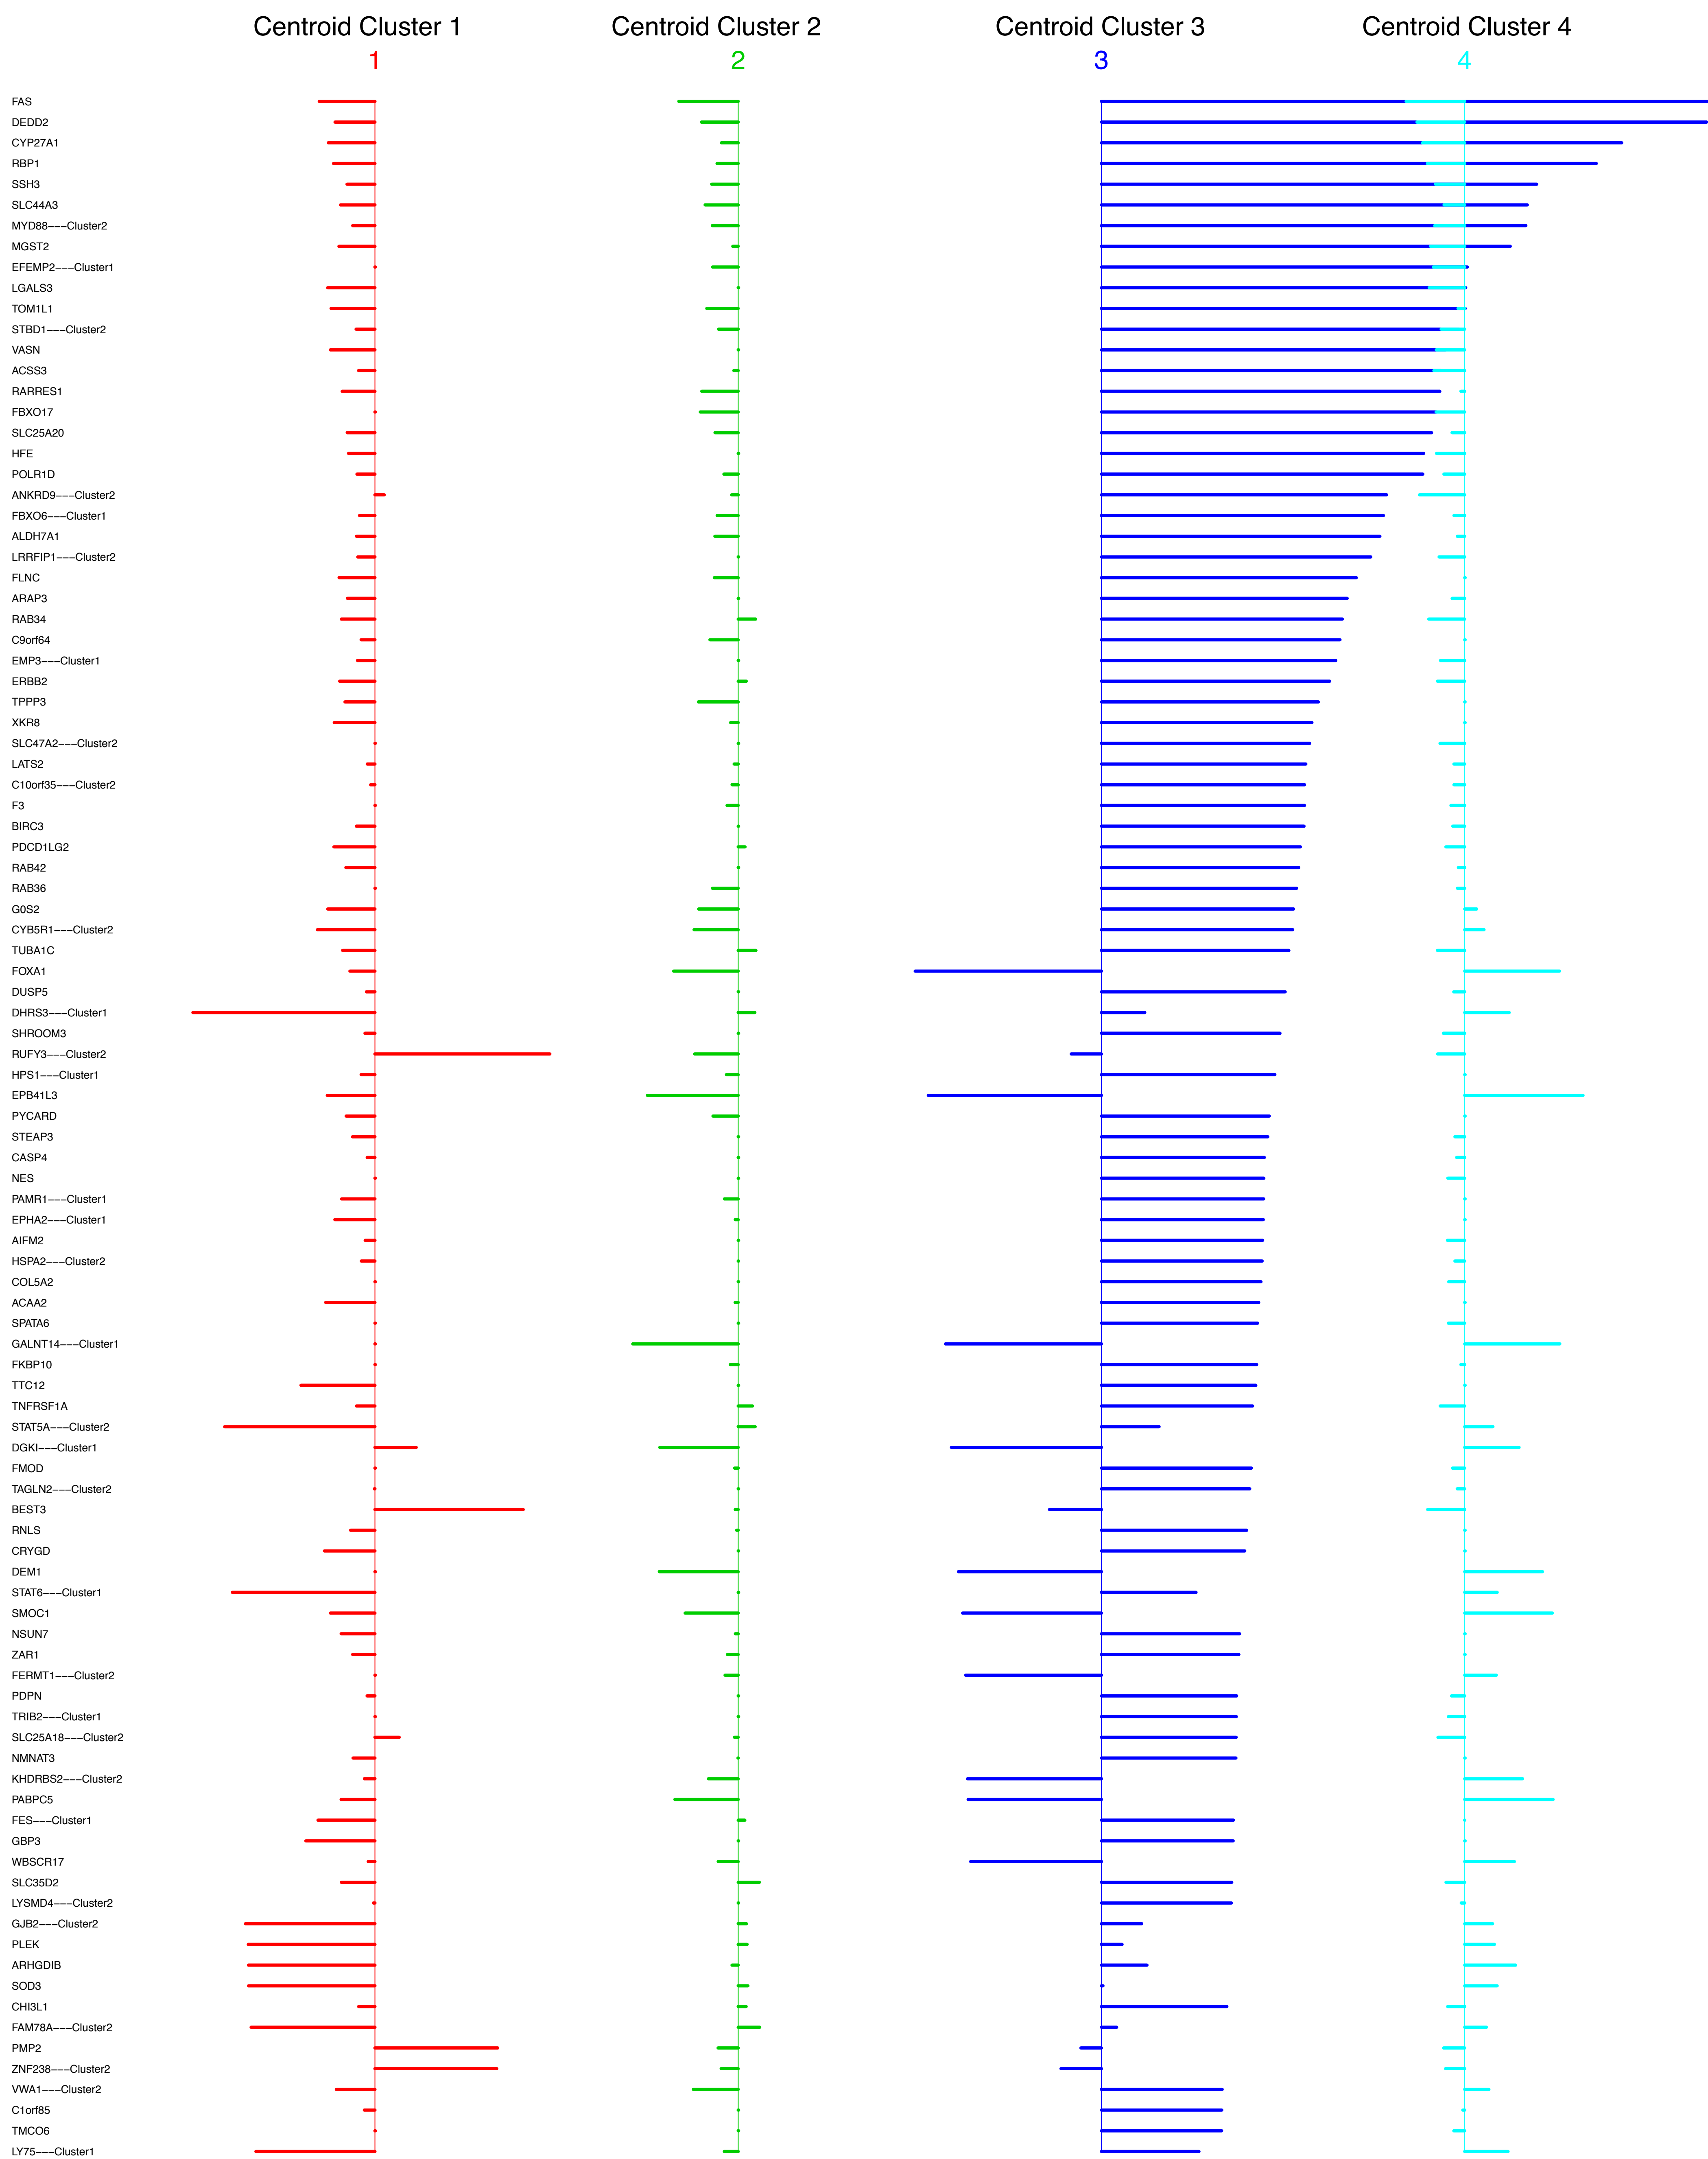

Centroid Cluster 1

Centroid Cluster 2

Centroid Cluster 3

1

2

3

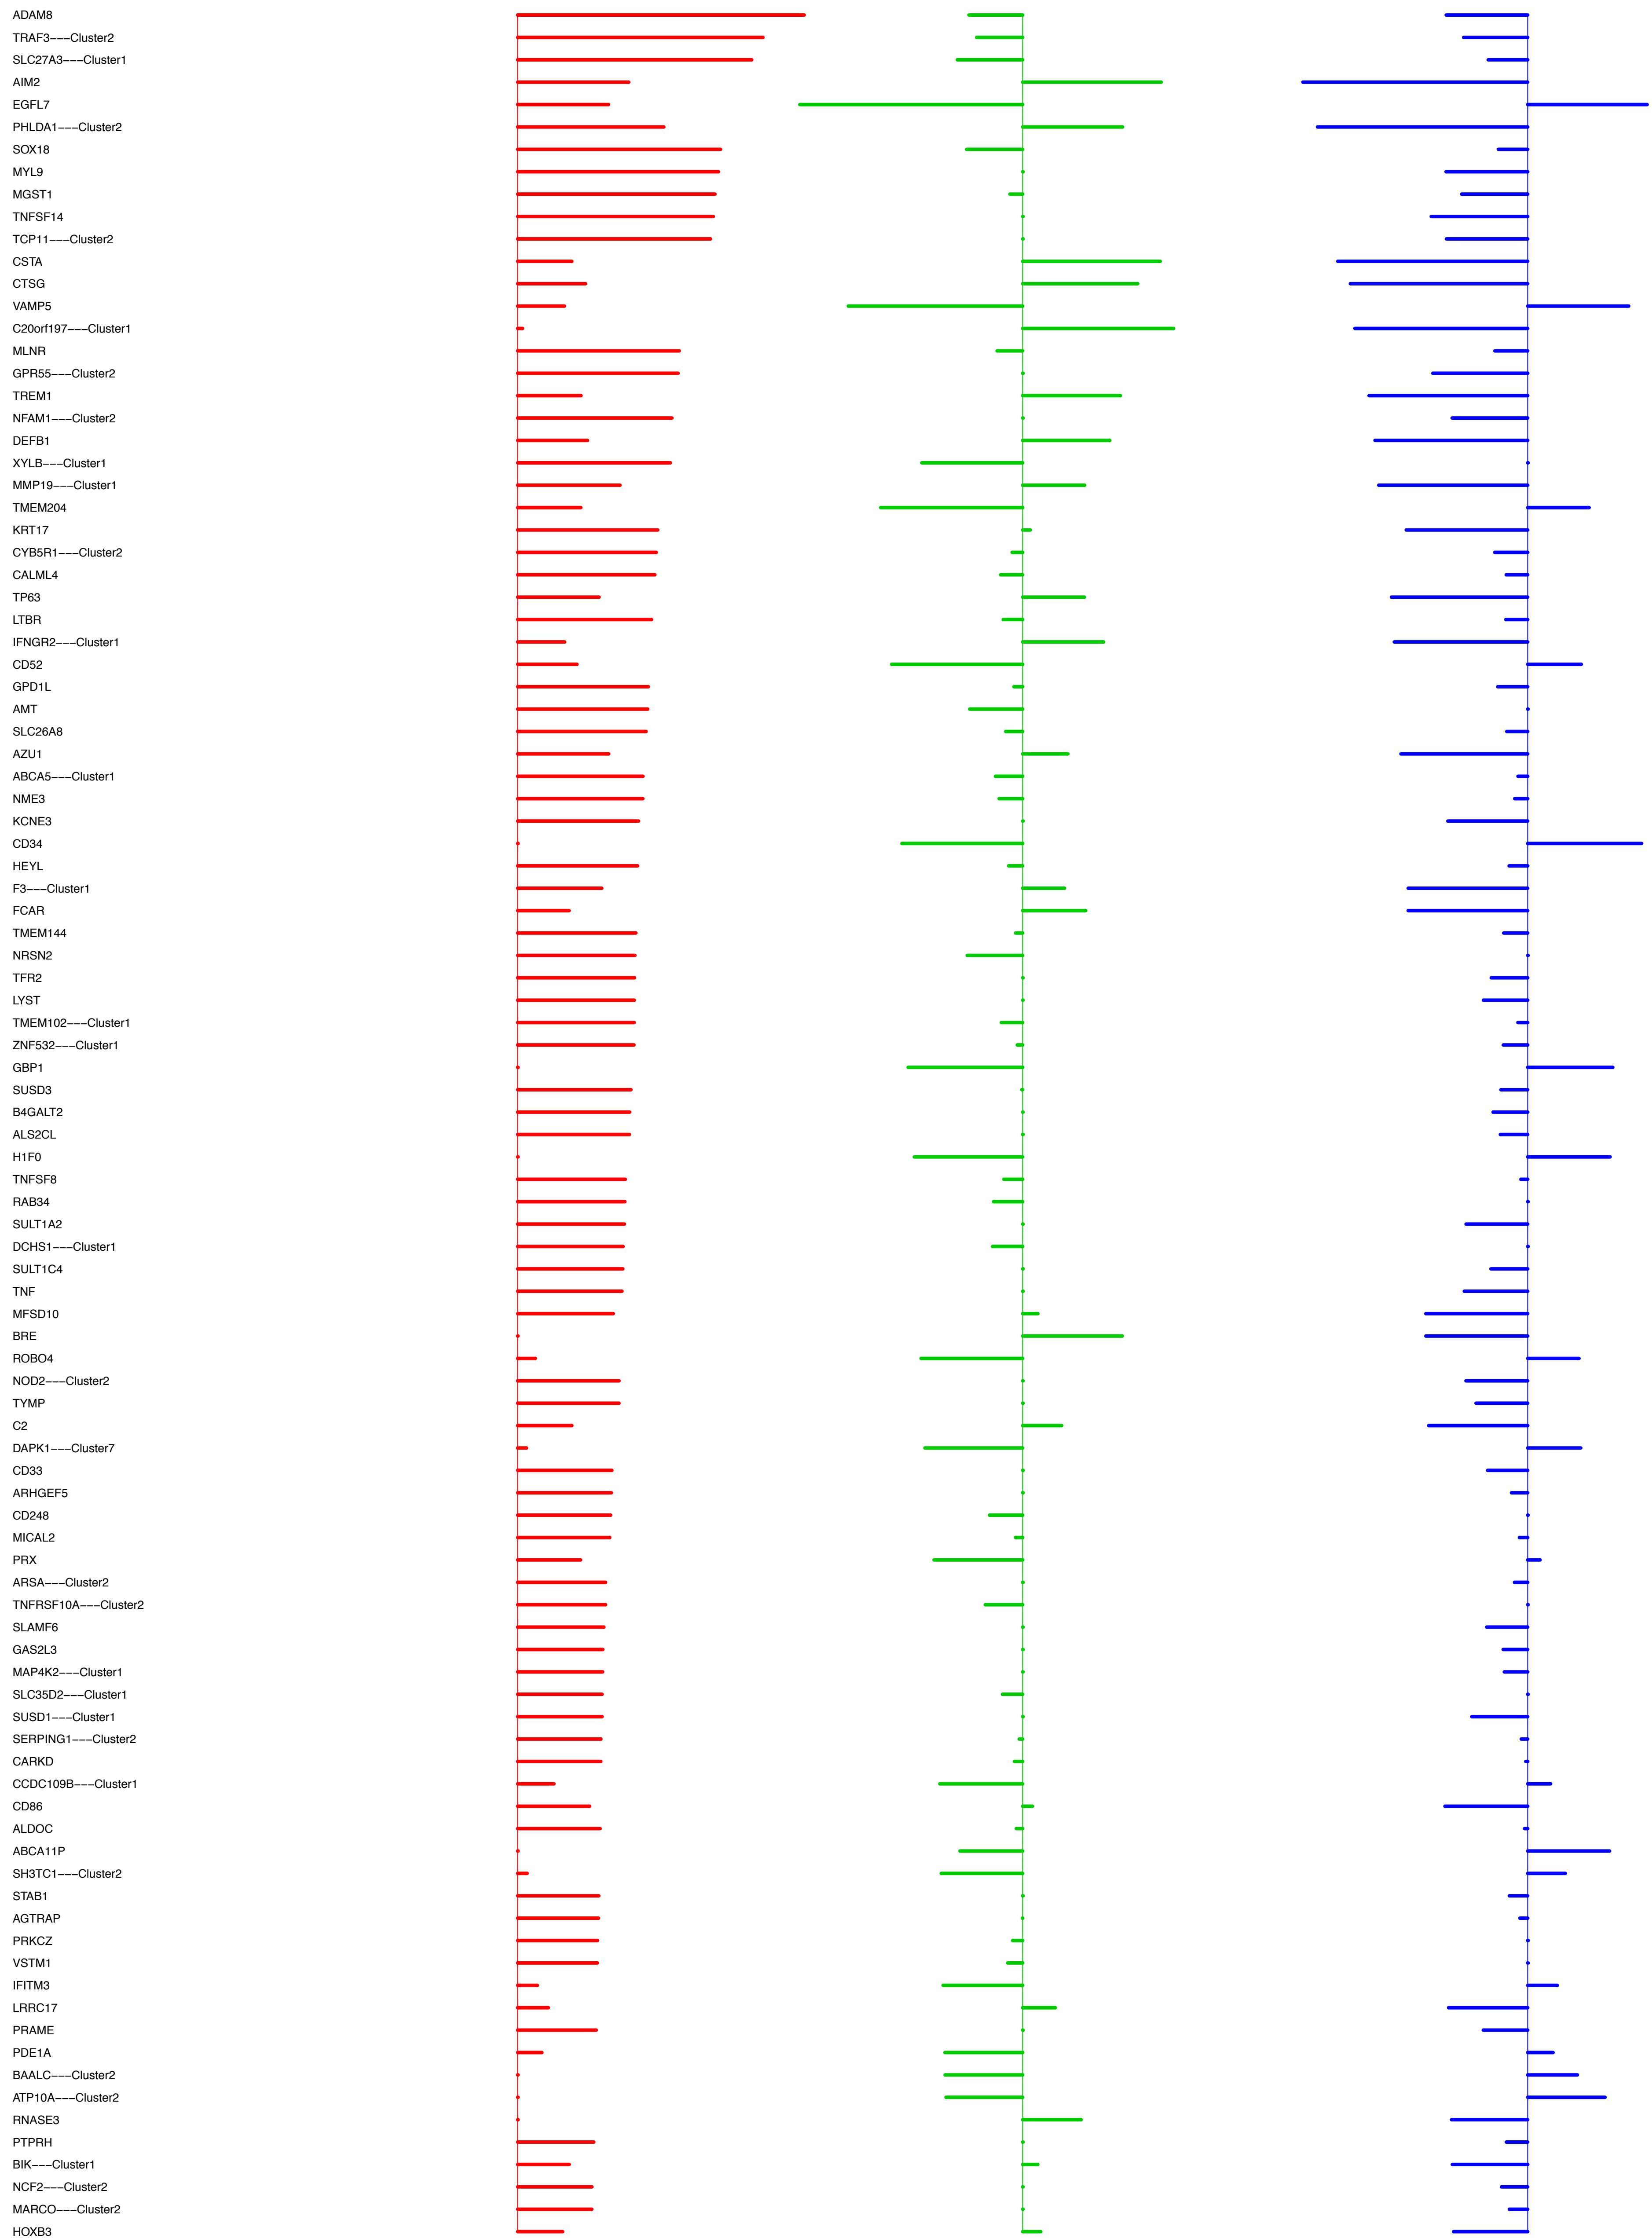

# Supplementary Figure 5

## BRCA HOPACH clustering

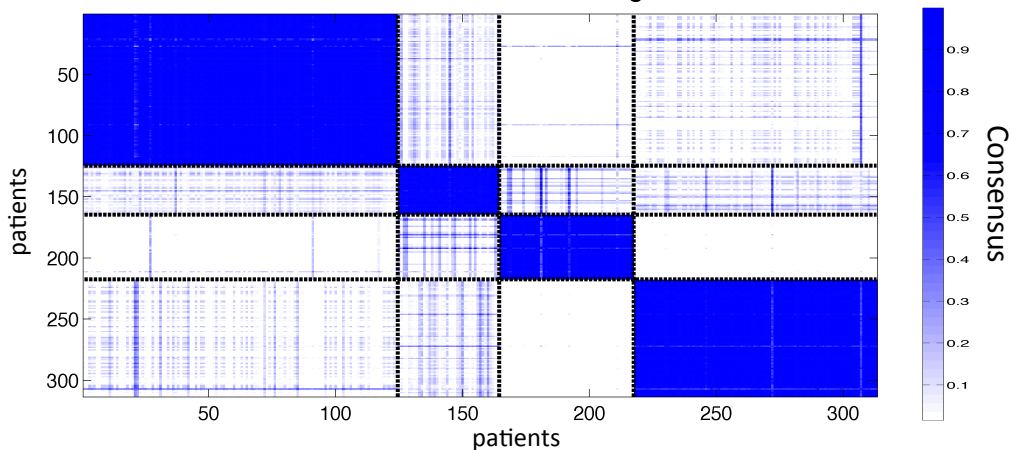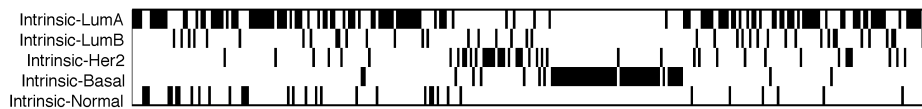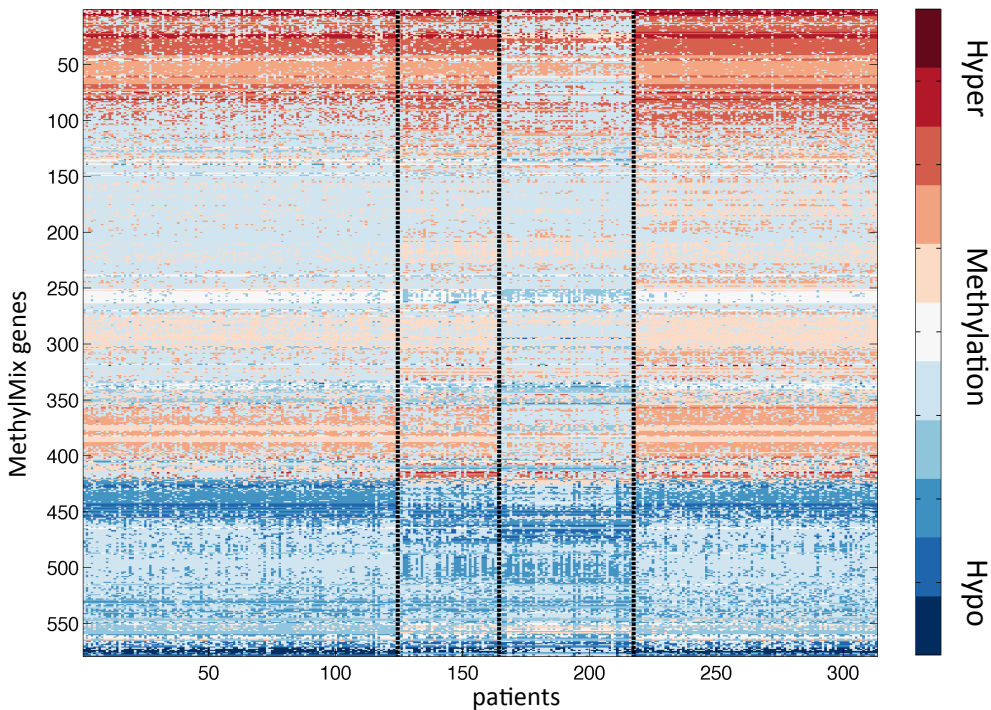





Supplementary Figure 7

### COAD clustering

C-CIMP

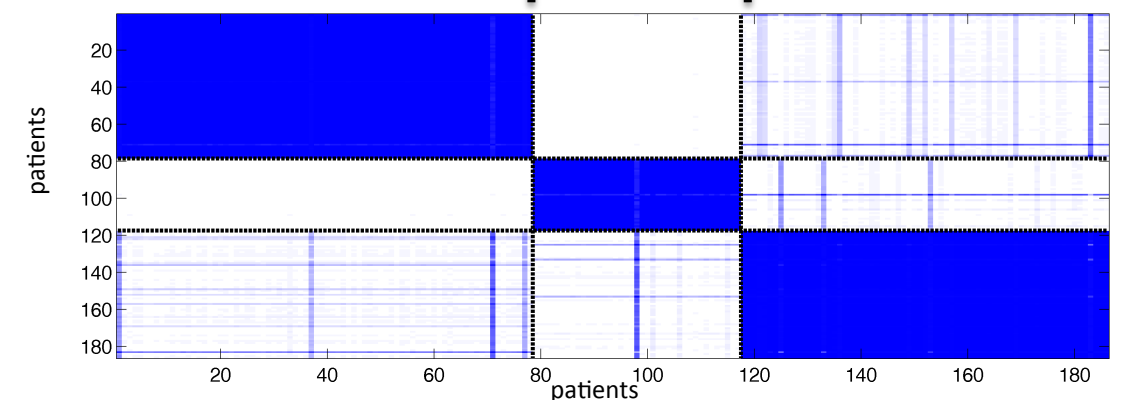

### GBM clustering

G-CIMP

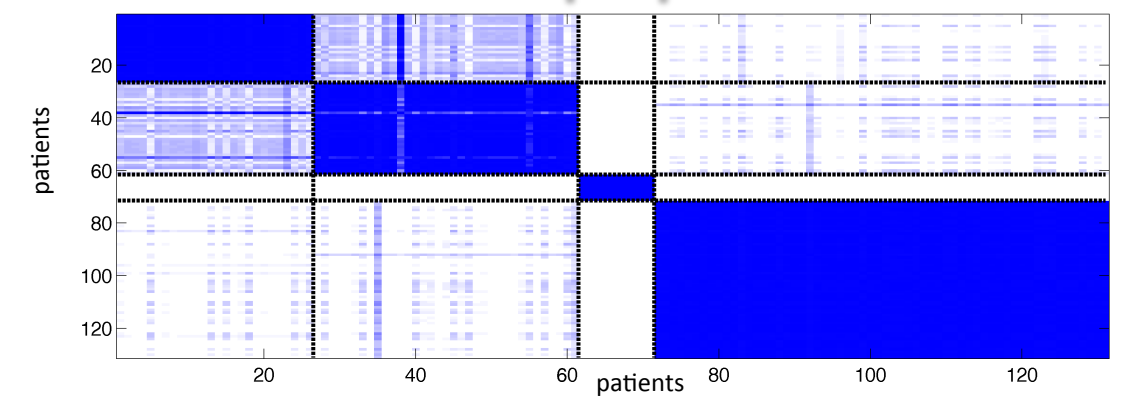

### LAML clustering

L-CIMP

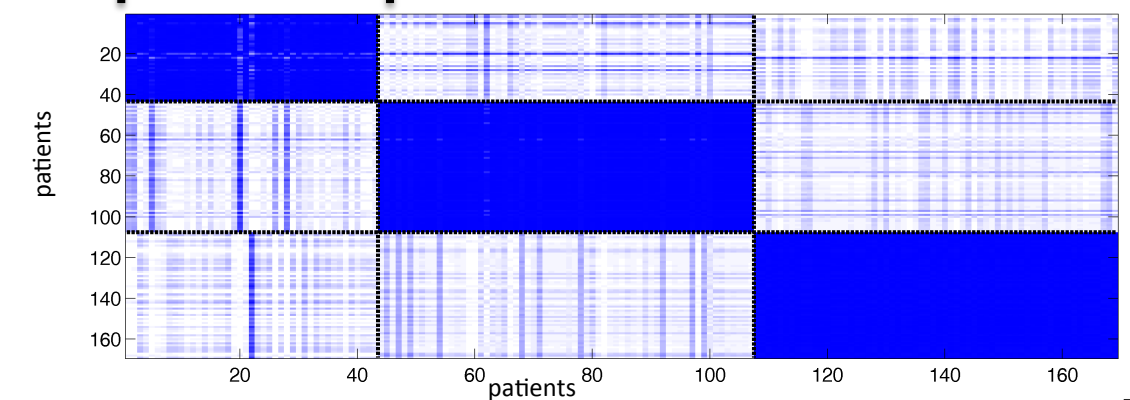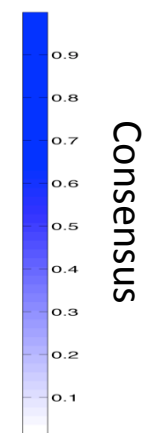

Gene expression clusters

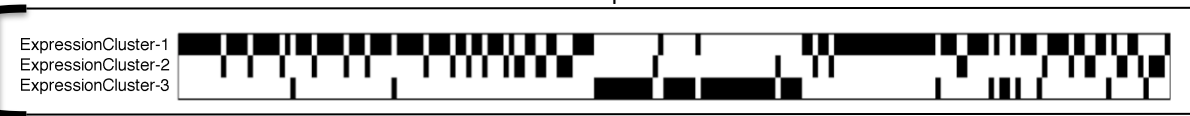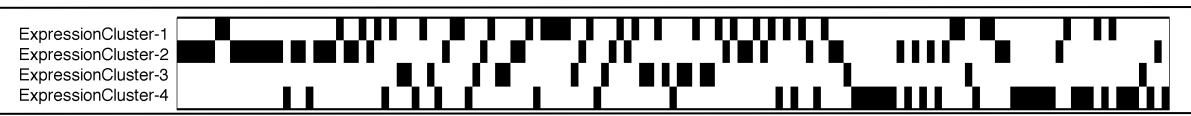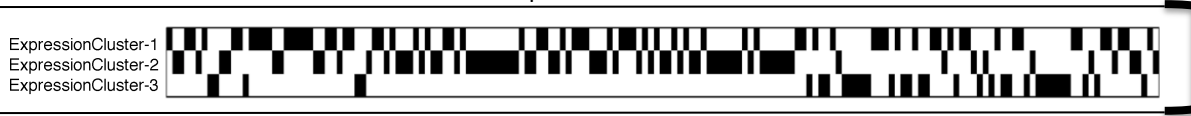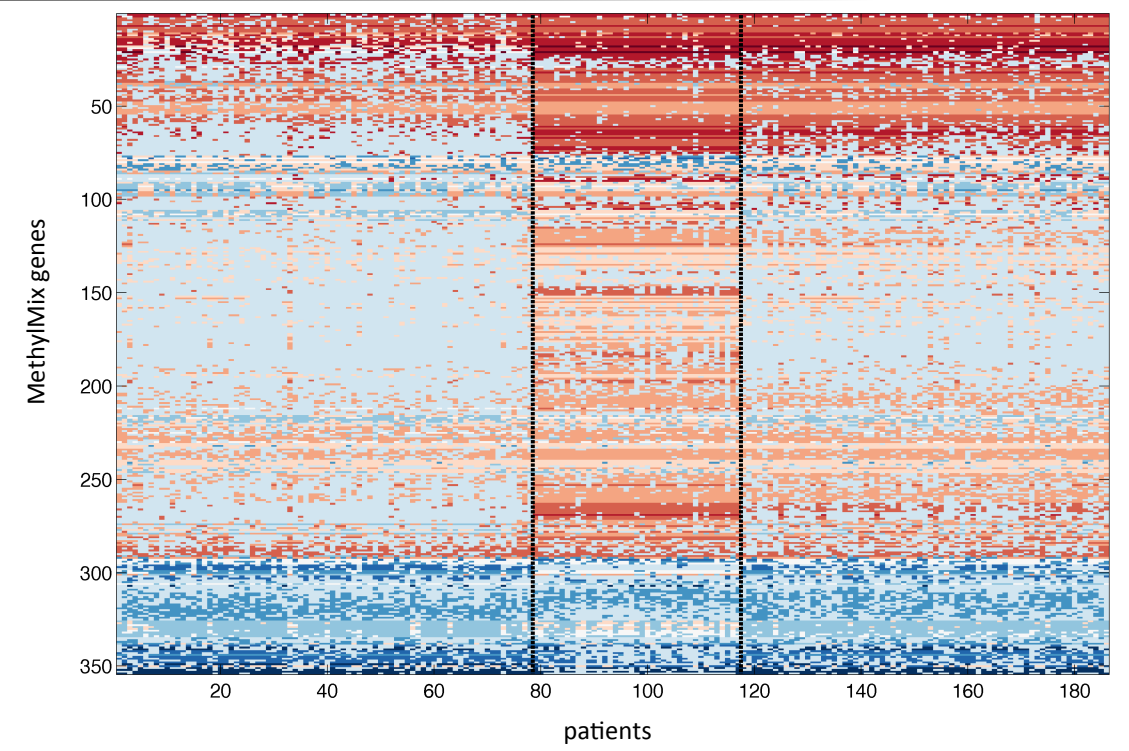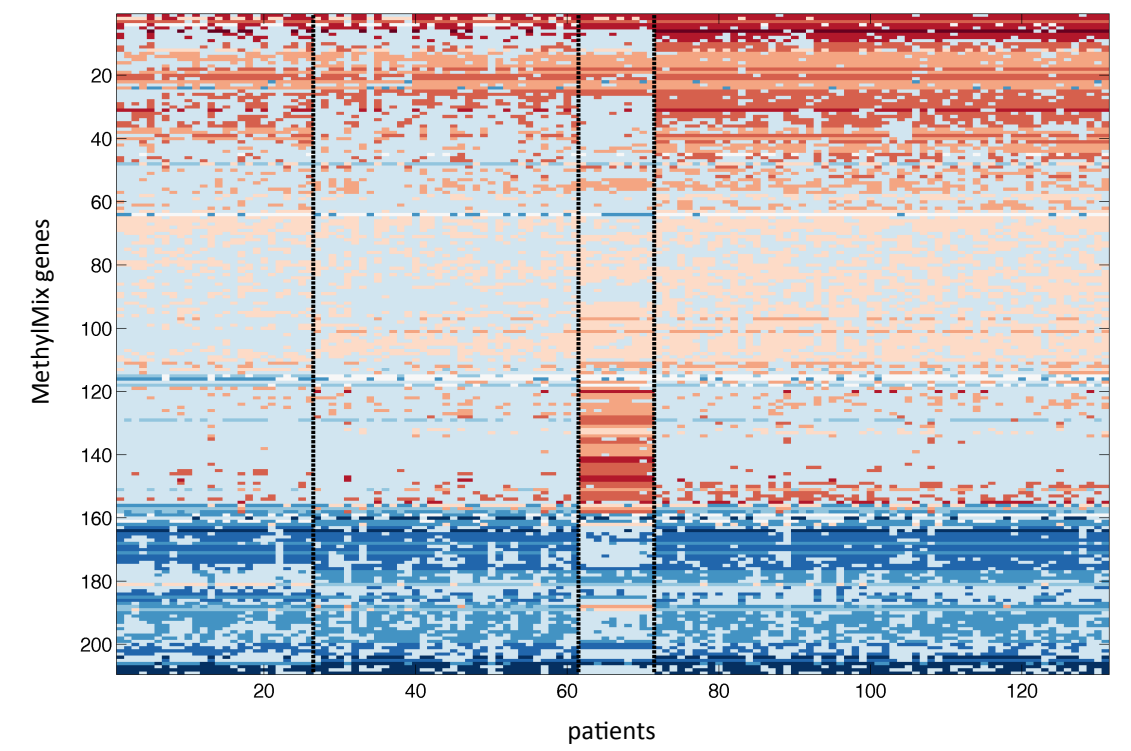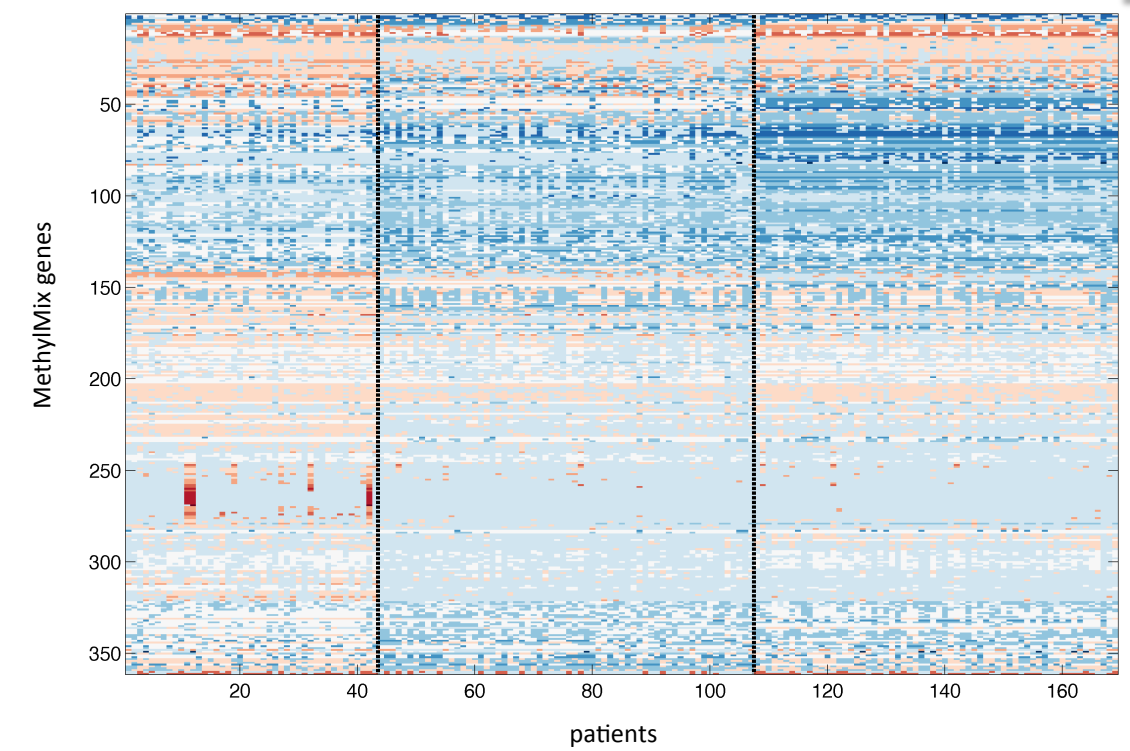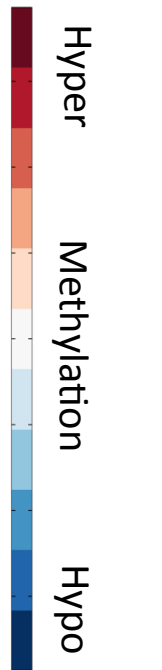

Supplementary Figure 8

UCEC

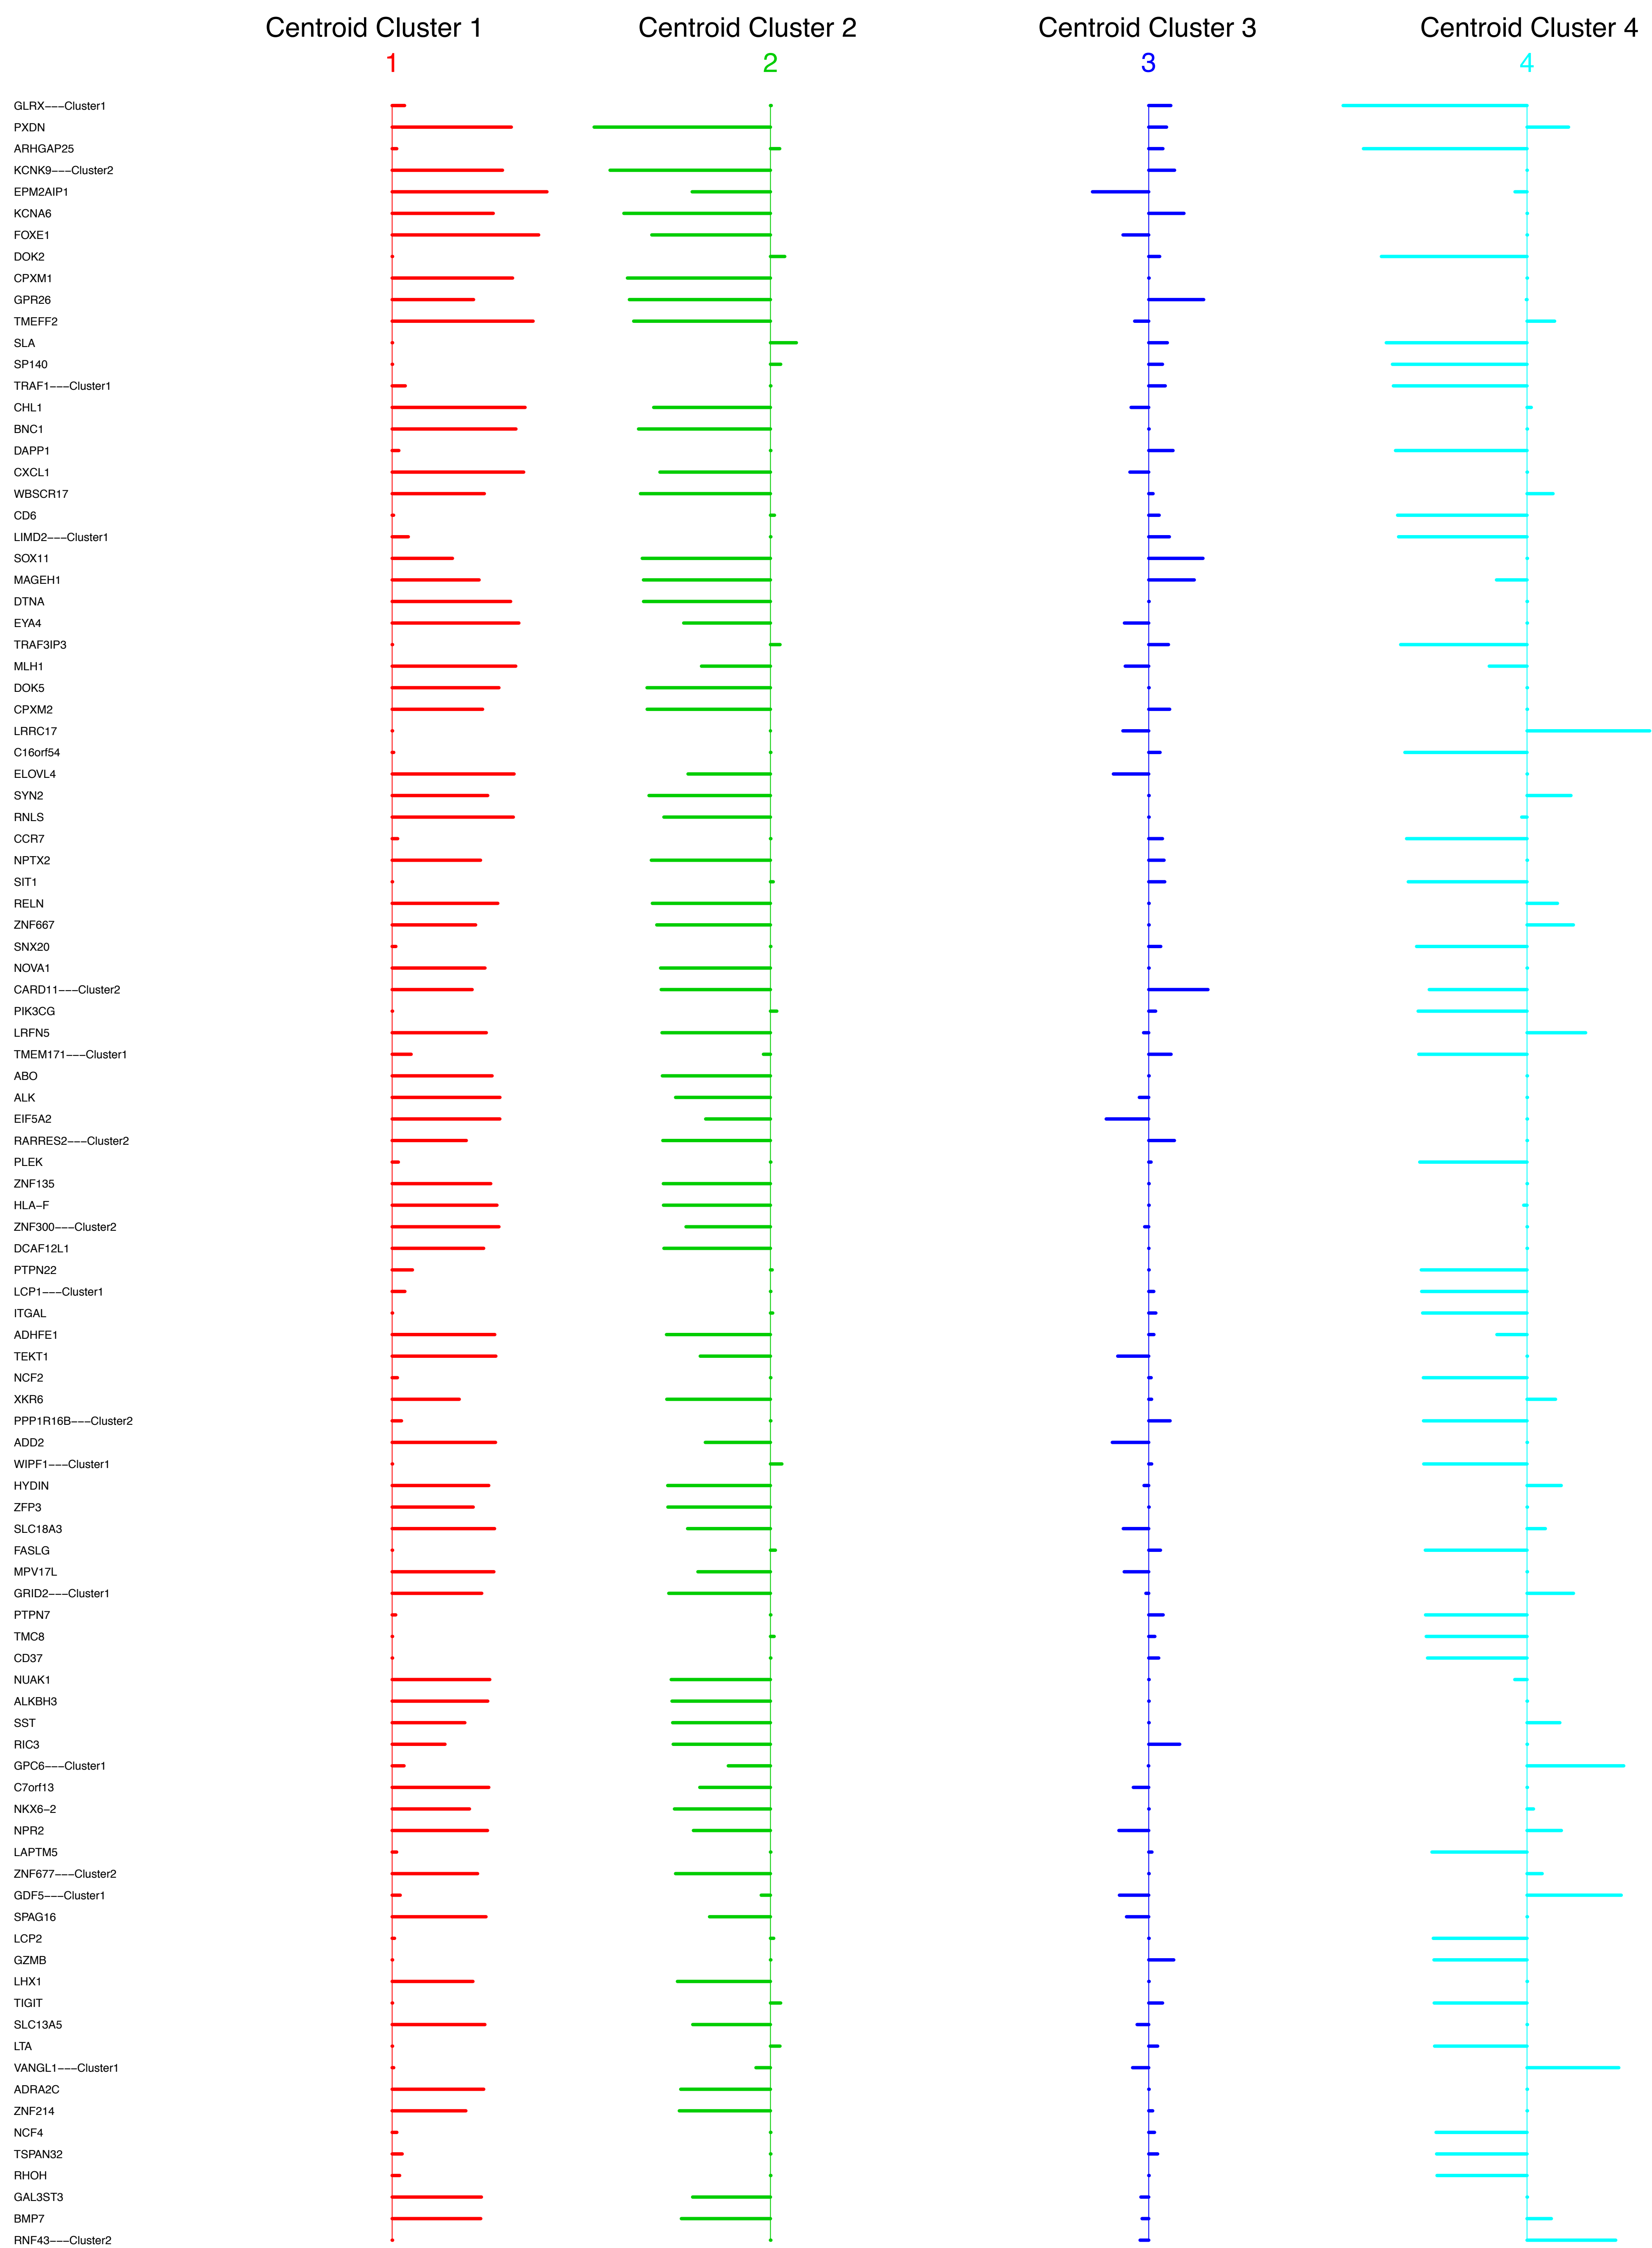

Supplementary Figure 9

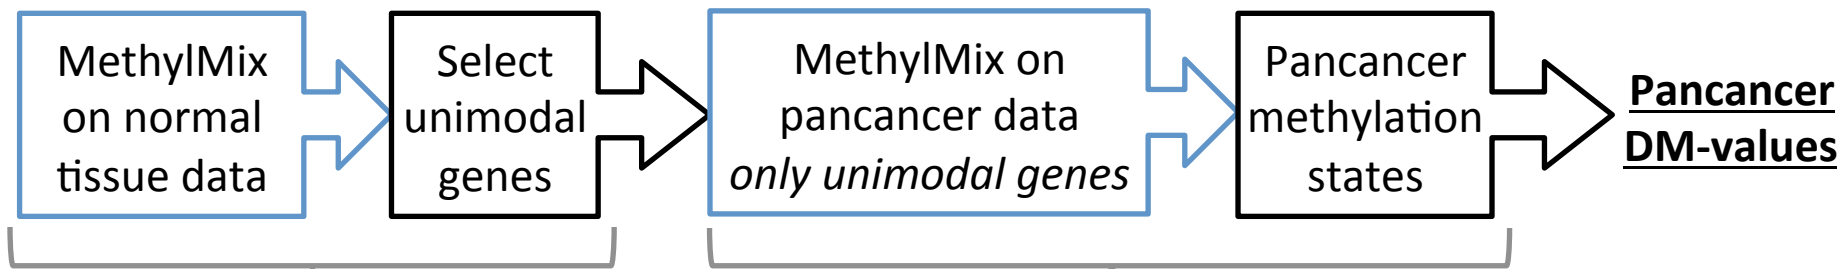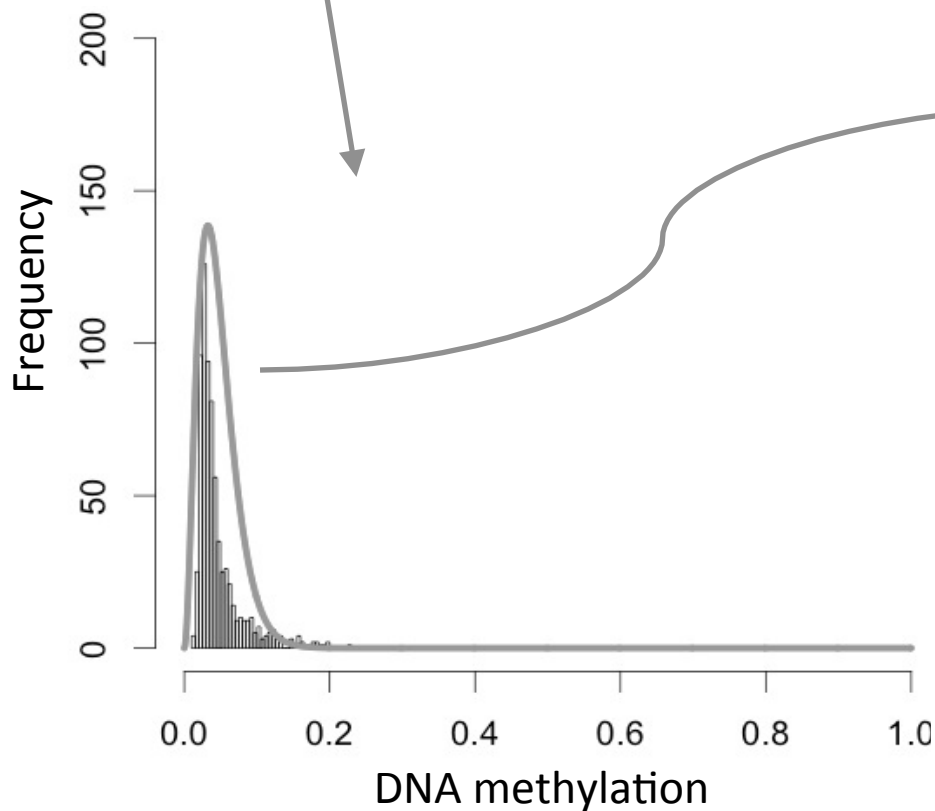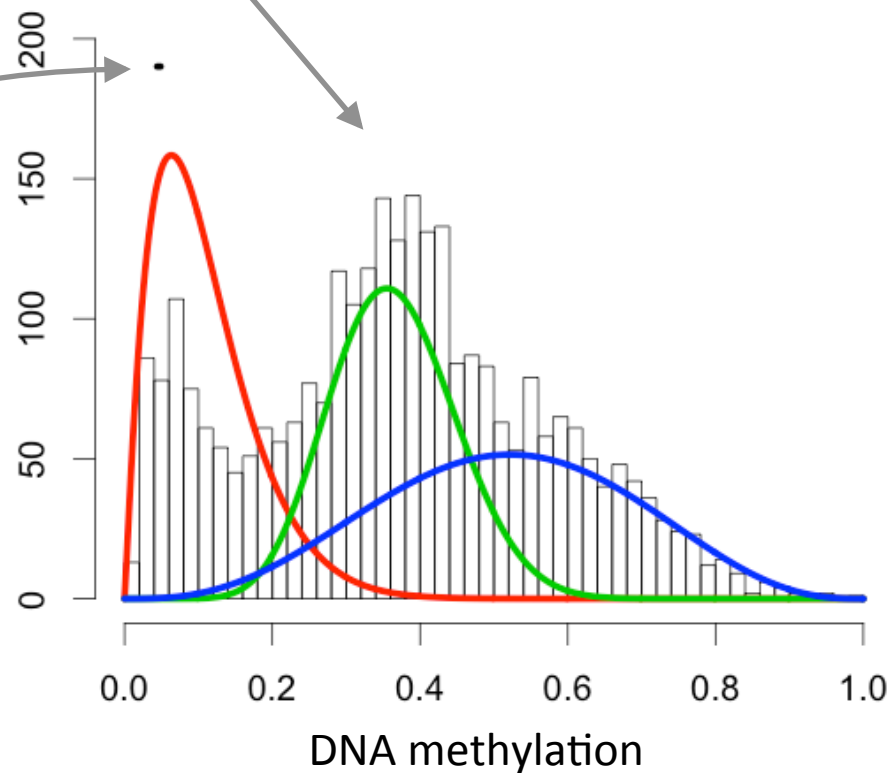

# Supplementary Figure 10

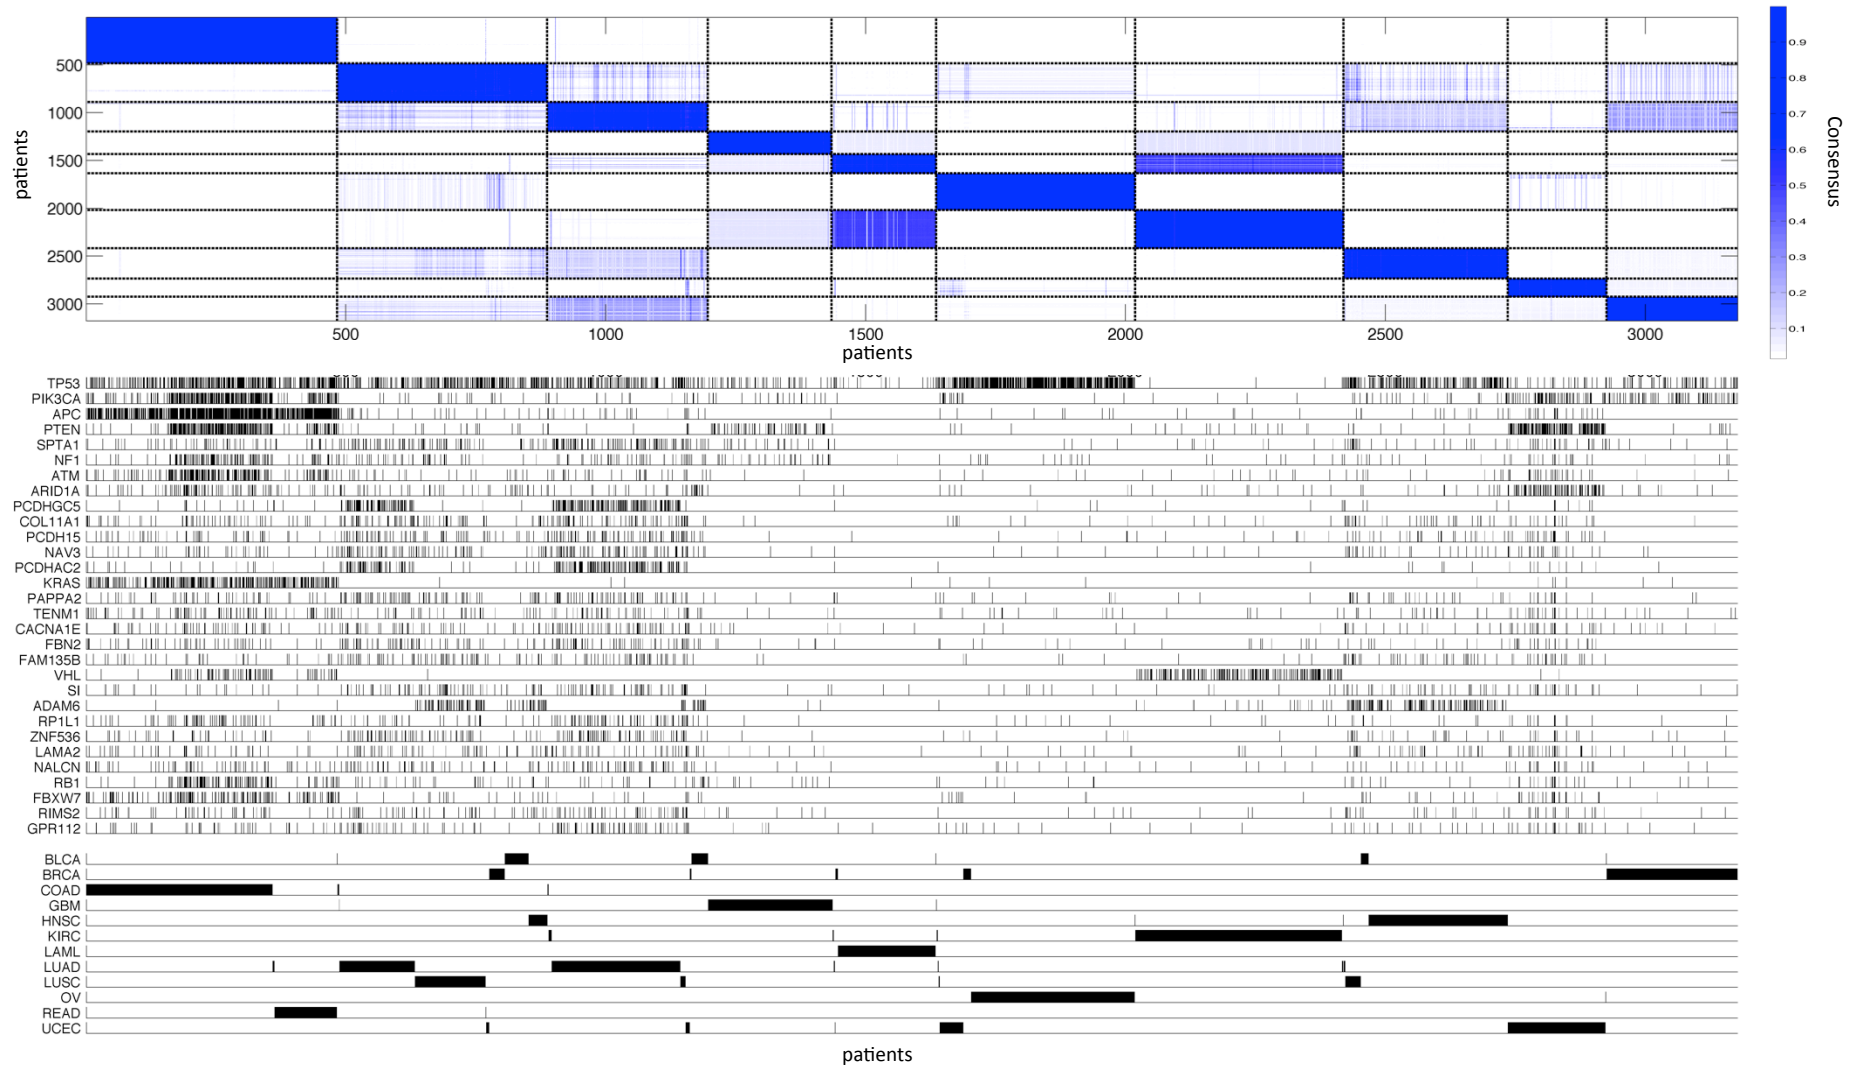

Supplementary Figure 11

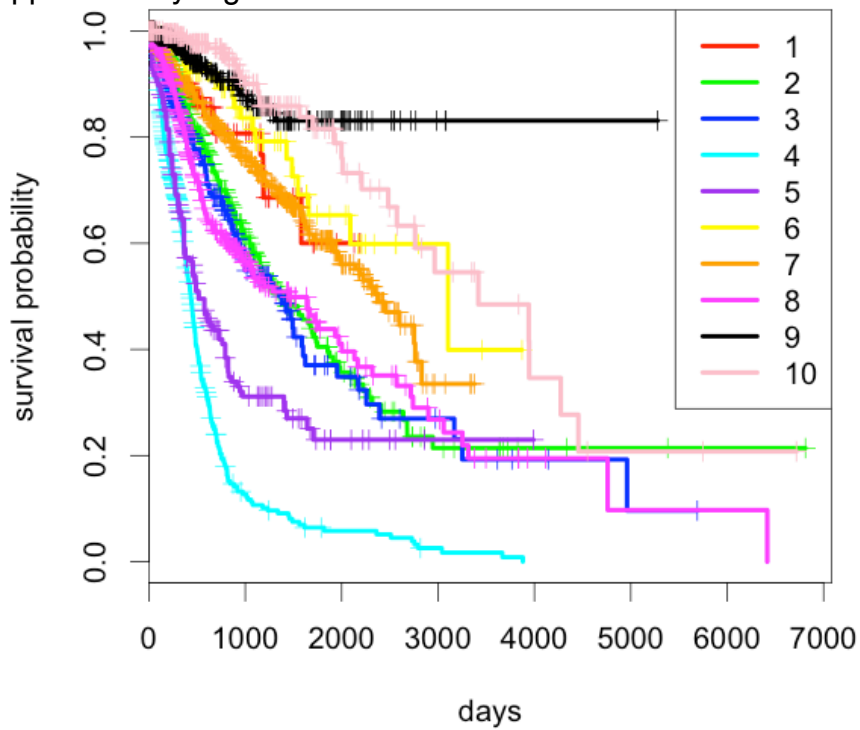

### DM-value clustering vs. TCGA mutation pancancer clustering

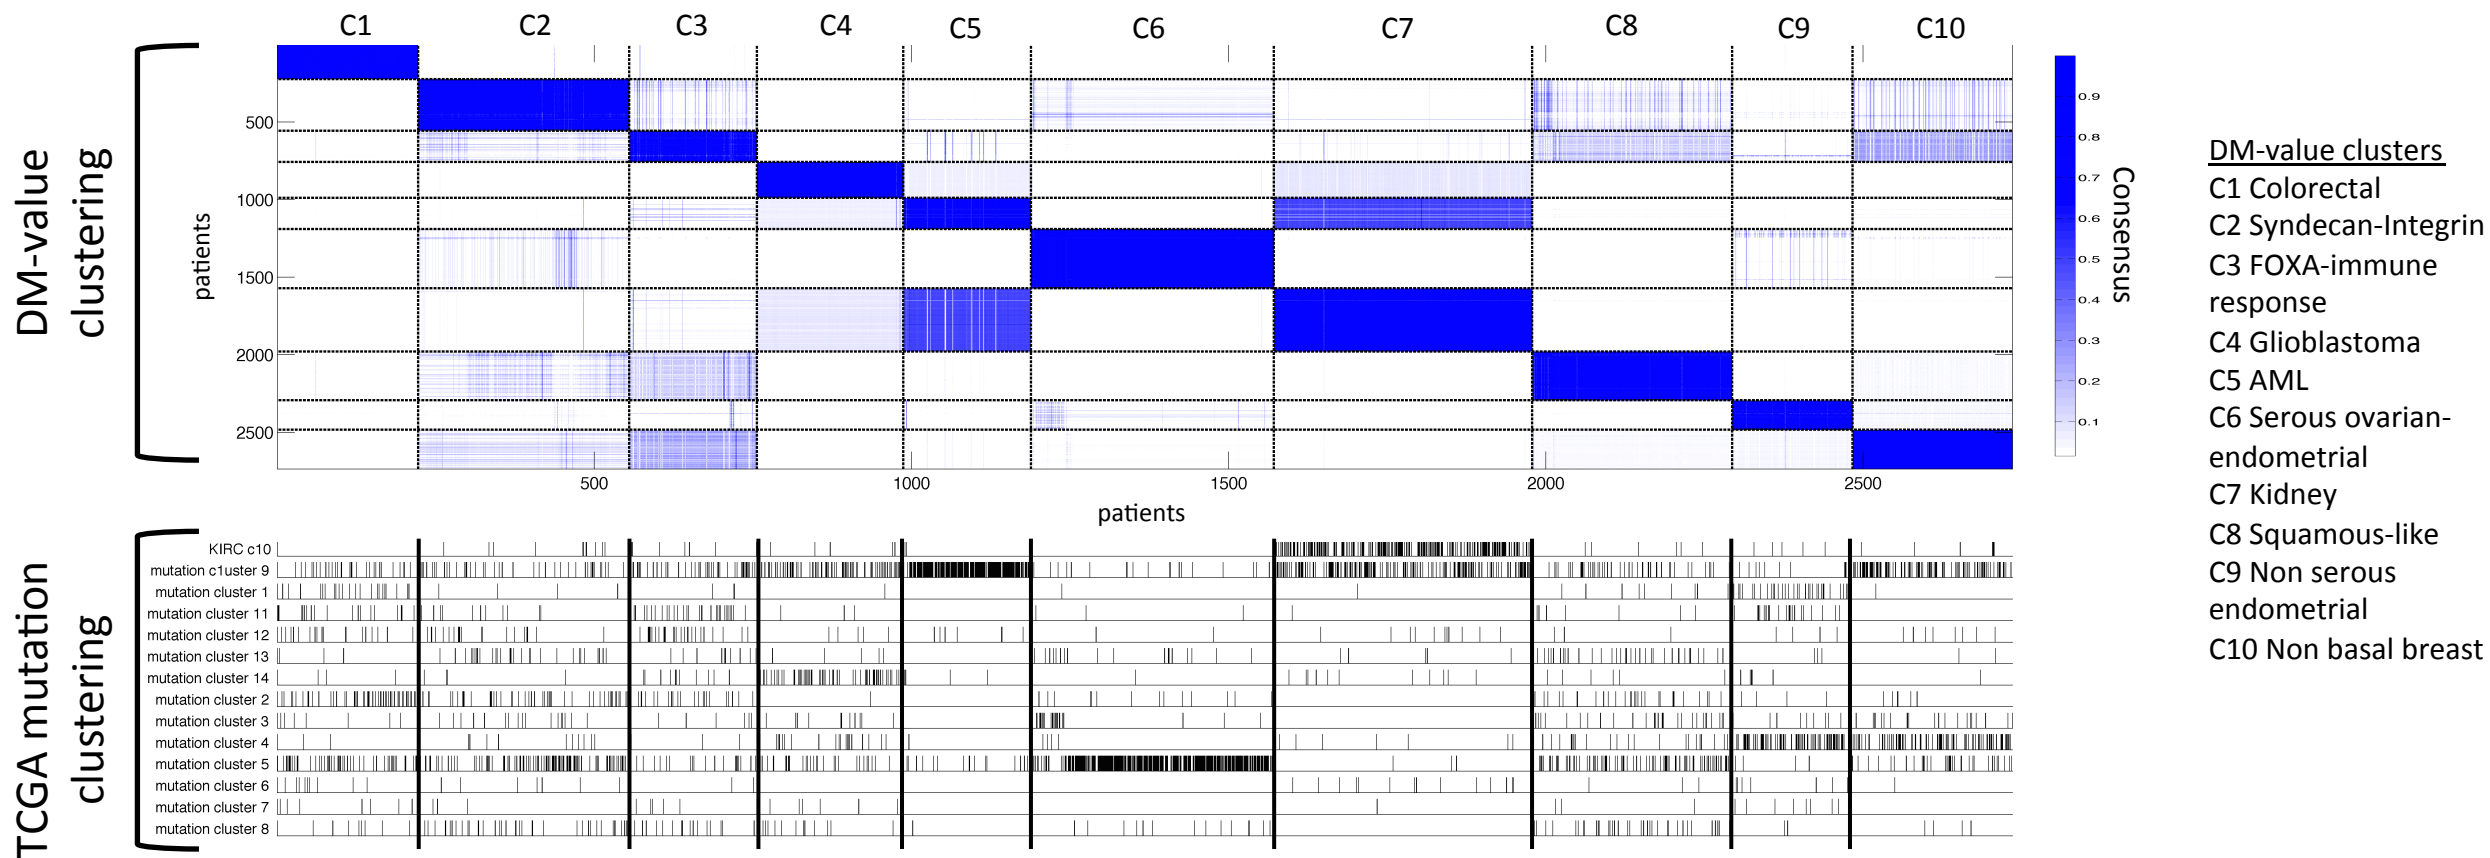

### DM-value clustering vs. TCGA copy number pancancer clustering

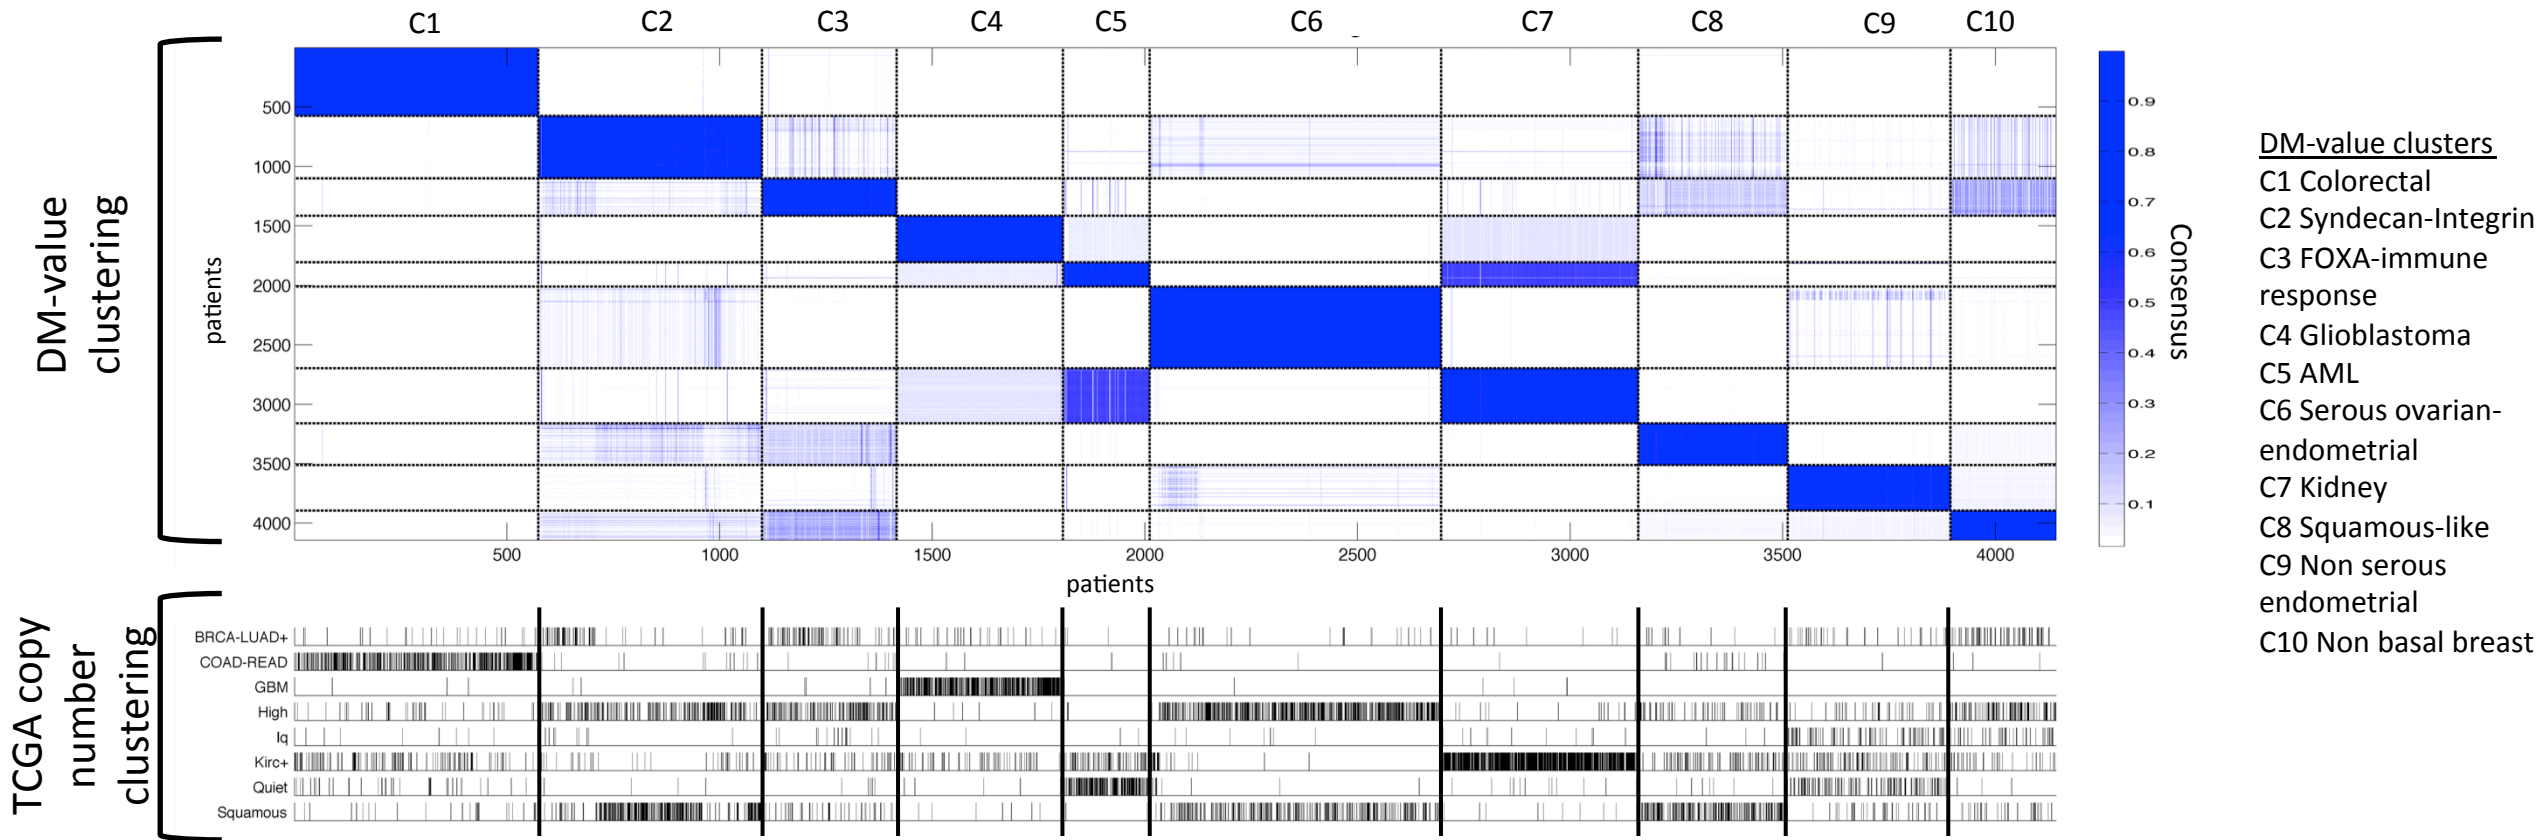

Supplementary Figure 14

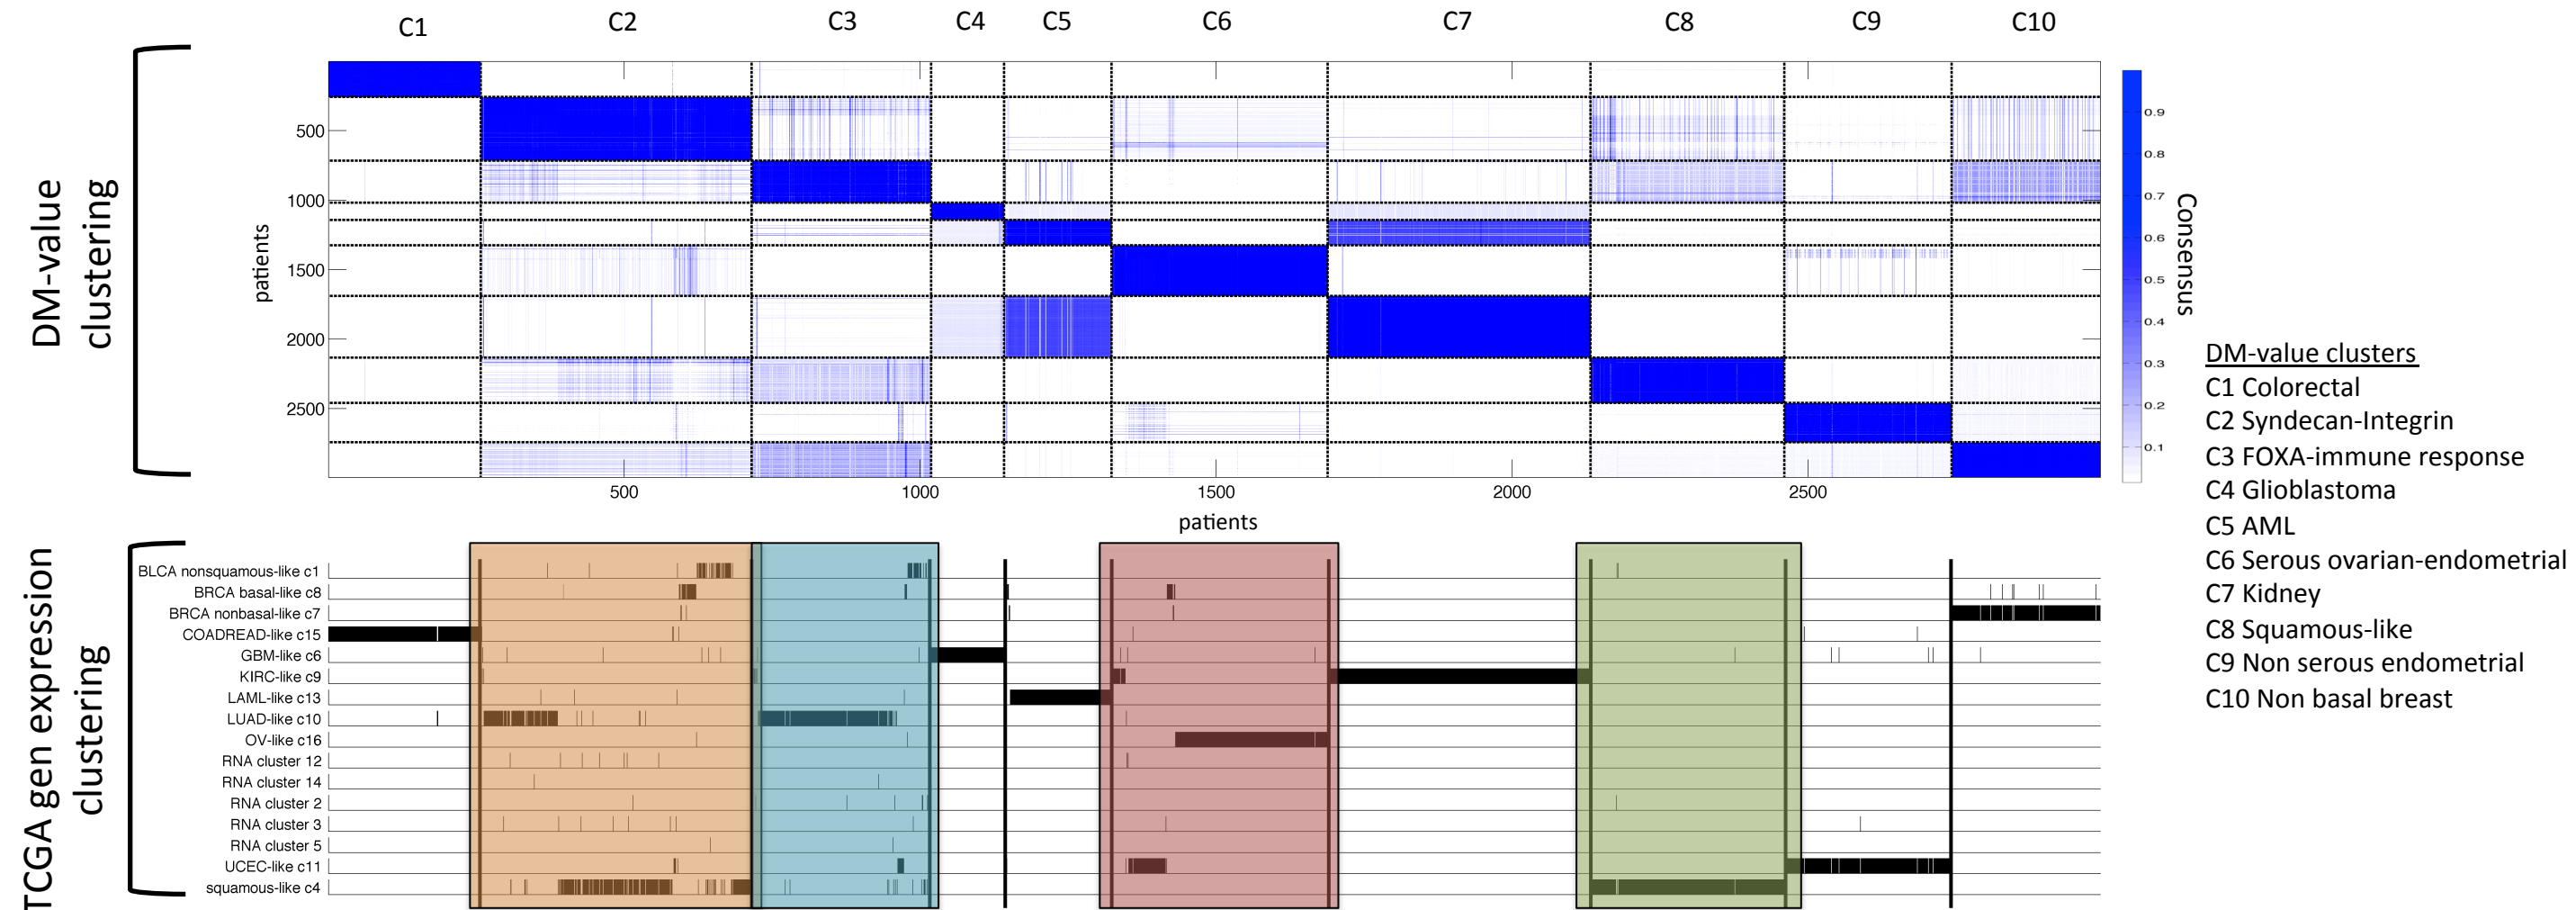



Supplementary Figure 15

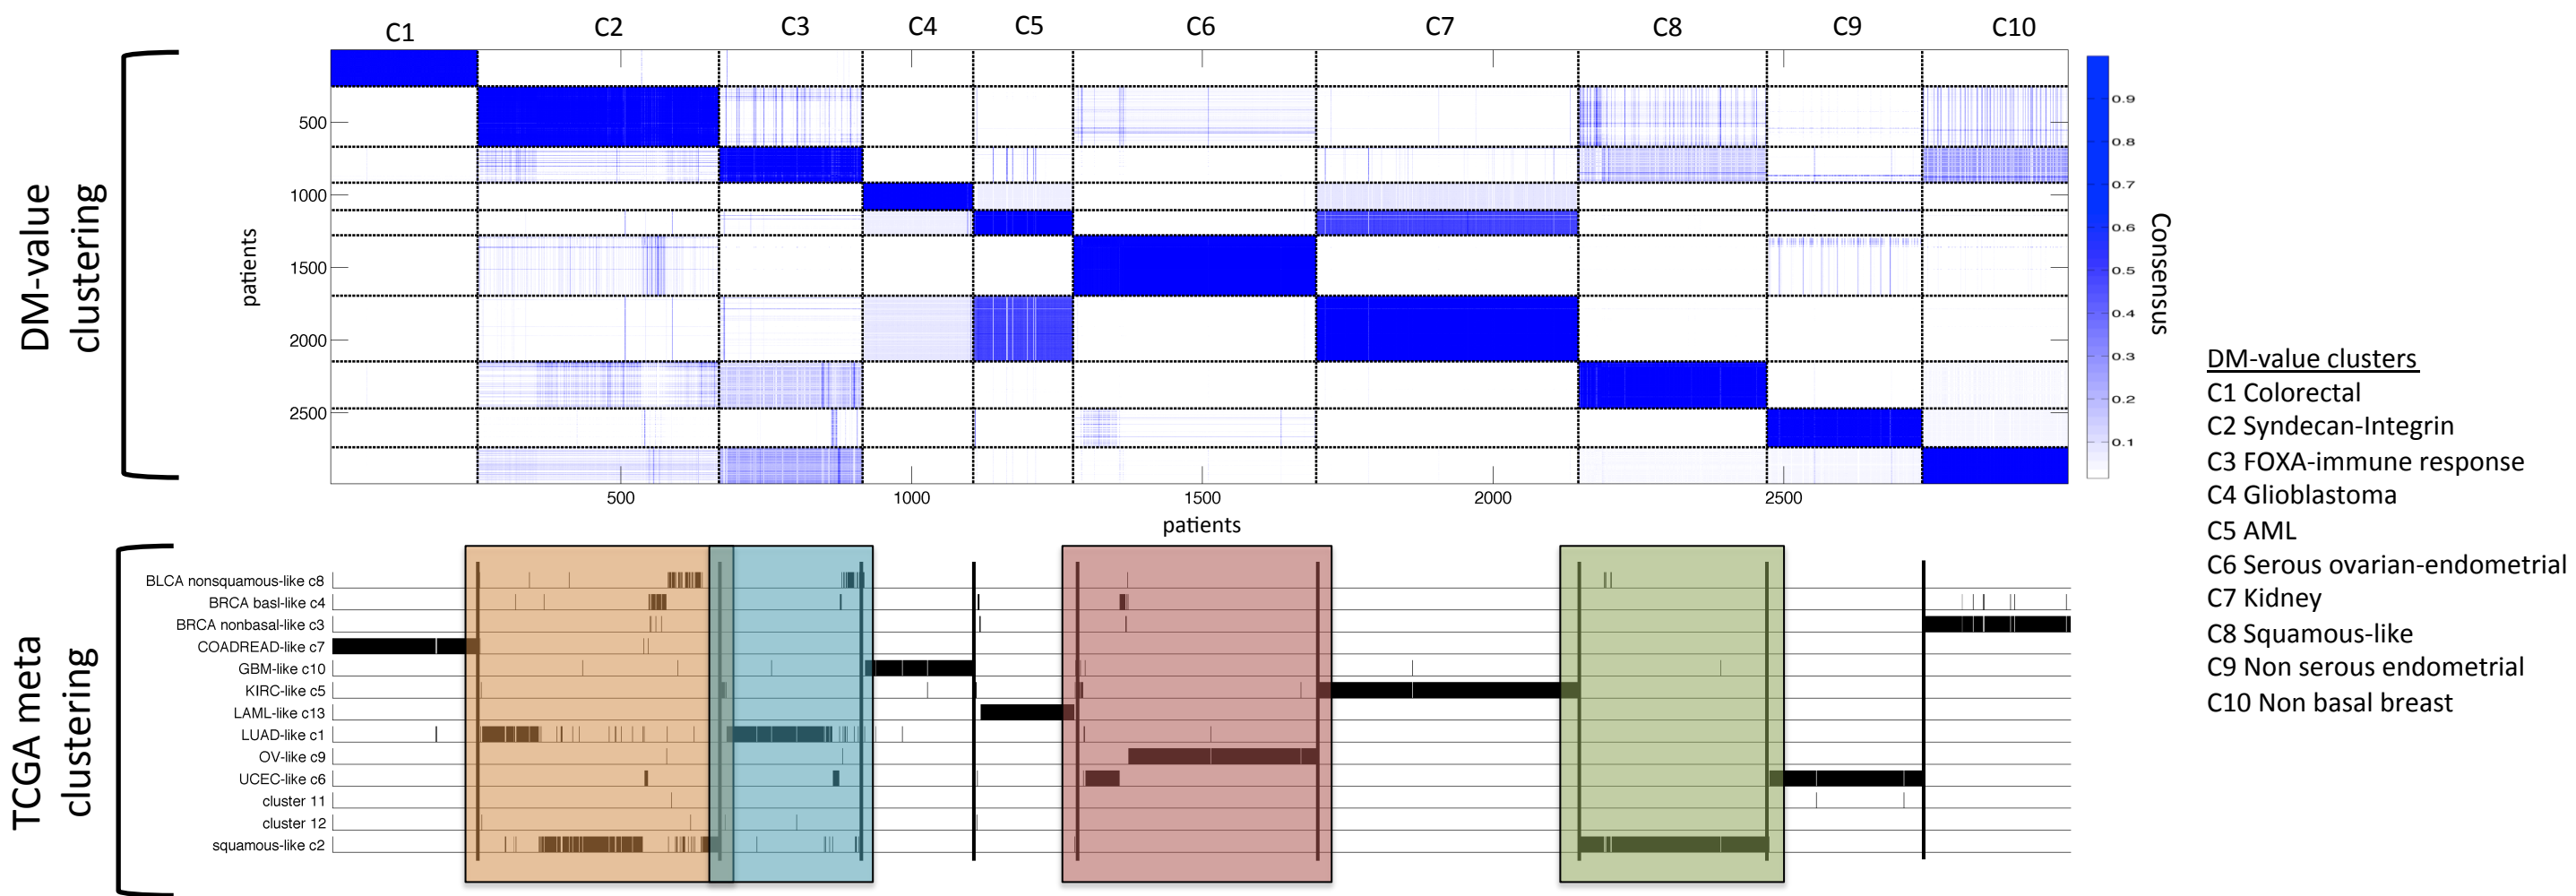

Supplement: 13059_2014_579_MOESM1_ESM.pdf [file 13059_2014_579_MOESM1_ESM.pdf]
