# Supplementary material for: Pancancer analysis of DNA methylation-driven genes using MethylMix
Source: PubMed Central journal article supplement (PMC4365533; doi:10.1186/s13059-014-0579-8), 2015-01-29
Supplement: 13059_2014_579_MOESM2_ESM.pdf [file 13059_2014_579_MOESM2_ESM.pdf]

## **Additional File 2**

### **Supplementary Table Legends**

Supplementary Table 1: Comparison of MethylMix with IMA by number of hyper and hypomethylated genes for each method.

Supplementary Table 2: Prevalence of hyper and hypomethylated genes exclusively identified by MethylMix when compared with IMA, and overlap of the genes exclusively identified by IMA with transcriptionally predictive genes when compared with MethylMix.

Supplementary Table 3: Identification of cancer driver genes based on correlation with pathological cancer stage and comparison of the MethylMix and IMA hyper and hypomethylated genes based on intersection with these cancer driver genes.

Supplementary Table 4: Prevalence of the top 100 hypermethylated genes across twelve cancer sites represented as the percentage of samples that have a hypermethylation for each gene.

Supplementary Table 5: Prevalence of the top 100 hypomethylated genes across twelve cancer sites represented as the percentage of samples that have a hypomethylation for each gene.

Supplementary Table 6: Gene expression fold change for the top 100 hypermethylated genes across twelve cancer sites.

Supplementary Table 7: Gene expression fold change for the top 100 hypomethylated genes across twelve cancer sites.

Supplementary Table 8: Enrichment of stem cell pathways across twelve cancer sites for hypermethylated genes.

Supplementary Table 9: Comparison between DM-value clustering and beta-value clustering based on the intra-cluster and inter-cluster consensus, and using the Jaccard coefficient for each cancer site.

Supplementary Table 10: Comparison of the known CIMP subtypes for COAD, LAML and GBM between the DM-value clustering and the beta-value clustering. Enrichment is shown for the gold standard clinical data that defines CIMP subgroups in these three cancer sites and compared for both the DM-value clustering and the beta-value clustering.

Supplementary Table 11: Comparison of the known CIMP subtypes for COAD, LAML and GBM between the DM-value clustering and RPMM clustering. Enrichment is shown for the gold standard clinical data that defines CIMP subgroups in these three cancer sites and compared for both the DM-value clustering and the beta-value clustering.

Supplementary Table 12: Comparison between DM-value clustering and gene expression clustering based on the intra-cluster and inter-cluster consensus, and using the Jaccard coefficient for each cancer site.

Supplementary Table 13: Pancancer cluster composition according to the twelve cancer sites.

Supplementary Table 14: Exclusive enrichment of gene sets for each of the ten pancancer clusters.

Supplementary Table 1

| Cancer site code | MethylMix |         |         | IMA      |         | Nr Hyper Overlap | Nr Hypo Overlap | Overlap with methylmix |     | Overlap with IMA |     |
|------------------|-----------|---------|---------|----------|---------|------------------|-----------------|------------------------|-----|------------------|-----|
|                  | Nr Hyper  | Nr Hypo | Nr Dual | Nr Hyper | Nr Hypo |                  |                 |                        |     |                  |     |
| BLCA             | 443       | 74      | 23      | 290      | 1739    | 34               | 10              | 8%                     | 14% | 12%              | 1%  |
| BRCA             | 798       | 203     | 132     | 2223     | 1395    | 369              | 71              | 46%                    | 35% | 17%              | 5%  |
| COAD             | 526       | 102     | 72      | 1768     | 1357    | 233              | 39              | 44%                    | 38% | 13%              | 3%  |
| GBM              | 246       | 140     | 22      | 958      | 1512    | 61               | 51              | 25%                    | 36% | 6%               | 3%  |
| HNSC             | 728       | 101     | 42      | 1278     | 1288    | 300              | 25              | 41%                    | 25% | 23%              | 2%  |
| KIRC             | 319       | 251     | 32      | 928      | 927     | 102              | 142             | 32%                    | 57% | 11%              | 15% |
| LAML             | 470       | 77      | 164     | 1887     | 330     | 119              | 17              | 25%                    | 22% | 6%               | 5%  |
| LUAD             | 576       | 182     | 39      | 1221     | 1057    | 198              | 58              | 34%                    | 32% | 16%              | 5%  |
| LUSC             | 605       | 133     | 38      | 881      | 1607    | 196              | 53              | 32%                    | 40% | 22%              | 3%  |
| OV               | 234       | 229     | 66      | 479      | 2015    | 51               | 109             | 22%                    | 48% | 11%              | 5%  |
| READ             | 321       | 75      | 37      | 1431     | 1617    | 134              | 35              | 42%                    | 47% | 9%               | 2%  |
| UCEC             | 618       | 238     | 77      | 1172     | 1862    | 234              | 113             | 38%                    | 47% | 20%              | 6%  |

| Cancer site code | COHCAP   |         | Nr Hyper Overlap | Nr Hypo Overlap | Overlap with methylmix |     | Overlap with COHCAP |     |
|------------------|----------|---------|------------------|-----------------|------------------------|-----|---------------------|-----|
|                  | Nr Hyper | Nr Hypo |                  |                 |                        |     |                     |     |
| BLCA             | 306      | 1939    | 45               | 18              | 10%                    | 24% | 15%                 | 1%  |
| BRCA             | 2199     | 1430    | 391              | 78              | 49%                    | 38% | 18%                 | 5%  |
| COAD             | 1687     | 1278    | 239              | 39              | 45%                    | 38% | 14%                 | 3%  |
| GBM              | 897      | 718     | 75               | 20              | 30%                    | 14% | 8%                  | 3%  |
| HNSC             | 1239     | 1261    | 302              | 25              | 41%                    | 25% | 24%                 | 2%  |
| KIRC             | 890      | 891     | 102              | 142             | 32%                    | 57% | 11%                 | 16% |
| LAML             | 1881     | 343     | 123              | 17              | 26%                    | 22% | 7%                  | 5%  |
| LUAD             | 1179     | 1051    | 200              | 58              | 35%                    | 32% | 17%                 | 6%  |
| LUSC             | 866      | 1589    | 198              | 53              | 33%                    | 40% | 23%                 | 3%  |
| OV               | 701      | 2362    | 66               | 130             | 28%                    | 57% | 9%                  | 6%  |
| READ             | 1433     | 1657    | 148              | 39              | 46%                    | 52% | 10%                 | 2%  |
| UCEC             | 1235     | 1813    | 266              | 114             | 43%                    | 48% | 22%                 | 6%  |

| Cancer site code | minfi    |         | Nr Hyper Overlap | Nr Hypo Overlap | Overlap with methylmix |  | Overlap with minfi |  |
|------------------|----------|---------|------------------|-----------------|------------------------|--|--------------------|--|
|                  | Nr Hyper | Nr Hypo |                  |                 |                        |  |                    |  |
| BLCA             | 1764     | 0       | 188              | 0               | 42%                    |  | 11%                |  |
| BRCA             | 3559     | 0       | 456              | 0               | 57%                    |  | 13%                |  |
| COAD             | 2933     | 0       | 282              | 0               | 54%                    |  | 10%                |  |
| GBM              | 2408     | 0       | 87               | 0               | 35%                    |  | 4%                 |  |
| HNSC             | 2473     | 0       | 345              | 0               | 47%                    |  | 14%                |  |
| KIRC             | 1765     | 0       | 164              | 0               | 51%                    |  | 9%                 |  |
| LAML             | 2233     | 0       | 131              | 0               | 28%                    |  | 6%                 |  |
| LUAD             | 2220     | 0       | 290              | 0               | 50%                    |  | 13%                |  |
| LUSC             | 2440     | 0       | 317              | 0               | 52%                    |  | 13%                |  |
| OV               | 2038     | 0       | 91               | 0               | 39%                    |  | 4%                 |  |
| READ             | 2779     | 0       | 199              | 0               | 62%                    |  | 7%                 |  |
| UCEC             | 3007     | 0       | 347              | 0               | 56%                    |  | 12%                |  |

# Supplementary Table 2

Supplementary Table 2A: Absolute number and proportion of transcriptionally predictive genes of all genes uniquely identified by IMA, COHCAP and minfi

| Cancer site    | IMA                                          |                                      |                                             |                                     | COHCAP                                       |                                      |                                             |                                     | Minfi                                        |                                      |
|----------------|----------------------------------------------|--------------------------------------|---------------------------------------------|-------------------------------------|----------------------------------------------|--------------------------------------|---------------------------------------------|-------------------------------------|----------------------------------------------|--------------------------------------|
|                | Number of Transcriptionally predictive Hyper | % Transcriptionally predictive Hyper | Number of Transcriptionally predictive Hypo | % Transcriptionally predictive Hypo | Number of Transcriptionally predictive Hyper | % Transcriptionally predictive Hyper | Number of Transcriptionally predictive Hypo | % Transcriptionally predictive Hypo | Number of Transcriptionally predictive Hyper | % Transcriptionally predictive Hyper |
| BLCA           | 6                                            | 2%                                   | 196                                         | 12%                                 | 33                                           | 13%                                  | 221                                         | 12%                                 | 37                                           | 2%                                   |
| BRCA           | 56                                           | 3%                                   | 110                                         | 9%                                  | 64                                           | 4%                                   | 116                                         | 9%                                  | 174                                          | 6%                                   |
| COAD           | 25                                           | 2%                                   | 57                                          | 5%                                  | 25                                           | 2%                                   | 57                                          | 5%                                  | 72                                           | 3%                                   |
| GBM            | 20                                           | 2%                                   | 34                                          | 2%                                  | 50                                           | 6%                                   | 23                                          | 3%                                  | 81                                           | 3%                                   |
| HNSC           | 9                                            | 1%                                   | 62                                          | 5%                                  | 10                                           | 1%                                   | 62                                          | 5%                                  | 47                                           | 2%                                   |
| KIRC           | 12                                           | 2%                                   | 74                                          | 10%                                 | 12                                           | 2%                                   | 74                                          | 10%                                 | 160                                          | 10%                                  |
| LAML           | 37                                           | 2%                                   | 19                                          | 6%                                  | 54                                           | 3%                                   | 24                                          | 7%                                  | 85                                           | 4%                                   |
| LUAD           | 8                                            | 1%                                   | 100                                         | 10%                                 | 8                                            | 1%                                   | 101                                         | 10%                                 | 76                                           | 4%                                   |
| LUSC           | 18                                           | 3%                                   | 141                                         | 9%                                  | 18                                           | 3%                                   | 141                                         | 9%                                  | 90                                           | 4%                                   |
| OV             | 14                                           | 3%                                   | 91                                          | 5%                                  | 33                                           | 5%                                   | 107                                         | 5%                                  | 129                                          | 7%                                   |
| READ           | 21                                           | 2%                                   | 108                                         | 7%                                  | 33                                           | 3%                                   | 116                                         | 7%                                  | 91                                           | 4%                                   |
| UCEC           | 17                                           | 2%                                   | 98                                          | 6%                                  | 26                                           | 3%                                   | 98                                          | 6%                                  | 153                                          | 6%                                   |
| <i>Average</i> | <i>20</i>                                    | <i>2%</i>                            | <i>91</i>                                   | <i>7%</i>                           | <i>31</i>                                    | <i>4%</i>                            | <i>95</i>                                   | <i>7%</i>                           | <i>100</i>                                   | <i>5%</i>                            |

Supplementary Table 2B: For all transcriptionally predictive genes: prevalence of hyper and hypomethylated genes identified by MethylMix, IMA, COHCAP and minfi

| Cancer site    | Hyper                     |                     |                        |                       | Hypo                      |                     |                        |                       |
|----------------|---------------------------|---------------------|------------------------|-----------------------|---------------------------|---------------------|------------------------|-----------------------|
|                | MethylMix <15% prevalence | IMA <15% prevalence | COHCAP <15% prevalence | minfi <15% prevalence | MethylMix <15% prevalence | IMA <15% prevalence | COHCAP <15% prevalence | minfi <15% prevalence |
| BLCA           | 73                        | 0                   | 1                      | 1                     | 1                         | 0                   | 0                      | n/a                   |
| BRCA           | 153                       | 11                  | 11                     | 15                    | 28                        | 1                   | 1                      | n/a                   |
| COAD           | 92                        | 2                   | 3                      | 4                     | 12                        | 0                   | 0                      | n/a                   |
| GBM            | 33                        | 2                   | 2                      | 2                     | 2                         | 0                   | 1                      | n/a                   |
| HNSC           | 133                       | 5                   | 5                      | 6                     | 12                        | 1                   | 1                      | n/a                   |
| KIRC           | 57                        | 2                   | 2                      | 3                     | 26                        | 4                   | 4                      | n/a                   |
| LAML           | 181                       | 6                   | 6                      | 8                     | 24                        | 0                   | 0                      | n/a                   |
| LUAD           | 101                       | 3                   | 3                      | 7                     | 11                        | 0                   | 0                      | n/a                   |
| LUSC           | 137                       | 2                   | 2                      | 2                     | 15                        | 0                   | 0                      | n/a                   |
| OV             | 25                        | 0                   | 0                      | 0                     | 18                        | 1                   | 1                      | n/a                   |
| READ           | 48                        | 1                   | 2                      | 1                     | 3                         | 3                   | 3                      | n/a                   |
| UCEC           | 98                        | 5                   | 5                      | 8                     | 25                        | 2                   | 2                      | n/a                   |
| <i>Average</i> | <i>94</i>                 | <i>3</i>            | <i>4</i>               | <i>5</i>              | <i>15</i>                 | <i>1</i>            | <i>1</i>               | <i>n/a</i>            |

## Supplementary Table 3

Supplementary Table 3A Number of cancer stage driver genes identified per cancer site

| Tissue code | Nr Samples | Nr cancer stage drivers       | Nr cancer stage drivers-<br>oncogenes | Nr cancer stage drivers-<br>suppressor genes |
|-------------|------------|-------------------------------|---------------------------------------|----------------------------------------------|
| BLCA        | 92         | 0                             | 0                                     | 0                                            |
| <b>BRCA</b> | <b>775</b> | <b>1128</b>                   | <b>249</b>                            | <b>879</b>                                   |
| COAD        | 190        | 49                            | 8                                     | 41                                           |
| GBM         |            | GBM is only advanced stage    |                                       |                                              |
| HNSC        | 257        | 43                            | 25                                    | 18                                           |
| <b>KIRC</b> | <b>470</b> | <b>6320</b>                   | <b>3969</b>                           | <b>2351</b>                                  |
| LAML        |            | No stage information for LAML |                                       |                                              |
| <b>LUAD</b> | <b>344</b> | <b>2353</b>                   | <b>509</b>                            | <b>1844</b>                                  |
| LUSC        | 219        | 1                             | 0                                     | 1                                            |
| OV          |            | Ovary is only advanced stage  |                                       |                                              |
| READ        | 71         | 0                             | 0                                     | 0                                            |
| <b>UCEC</b> | <b>331</b> | <b>4093</b>                   | <b>2349</b>                           | <b>1744</b>                                  |

Supplementary Table 3B Overlap of cancer stage driver genes with MethylMix and IMA

| Tissue code | MethylMix overlap with<br>cancer stage drivers | <b>MethylMix overlap with<br/>cancer stage drivers (%)</b> | IMA overlap with cancer<br>stage drivers | <b>IMA overlap with cancer<br/>stage drivers (%)</b> |
|-------------|------------------------------------------------|------------------------------------------------------------|------------------------------------------|------------------------------------------------------|
| <b>BRCA</b> | 108                                            | <b>8.5%</b>                                                | 194                                      | <b>5.6%</b>                                          |
| <b>KIRC</b> | 305                                            | <b>48.1%</b>                                               | 562                                      | <b>31.6%</b>                                         |
| <b>LUAD</b> | 130                                            | <b>15.6%</b>                                               | 241                                      | <b>10.9%</b>                                         |
| <b>UCEC</b> | 152                                            | <b>15.1%</b>                                               | 335                                      | <b>11.3%</b>                                         |

Text

  

| Tissue code | COHCAP overlap with<br>cancer stage drivers | <b>COHCAP overlap with cancer<br/>stage drivers (%)</b> |
|-------------|---------------------------------------------|---------------------------------------------------------|
| <b>BRCA</b> | 202                                         | <b>5.6%</b>                                             |
| <b>KIRC</b> | 562                                         | <b>31.6%</b>                                            |
| <b>LUAD</b> | 234                                         | <b>10.5%</b>                                            |
| <b>UCEC</b> | 342                                         | <b>11.2%</b>                                            |

  

| Tissue code | minfi overlap with cancer<br>stage drivers | <b>minfi overlap with cancer<br/>stage drivers (%)</b> |
|-------------|--------------------------------------------|--------------------------------------------------------|
| <b>BRCA</b> | 256                                        | <b>7.2%</b>                                            |
| <b>KIRC</b> | 311                                        | <b>17.6%</b>                                           |
| <b>LUAD</b> | 320                                        | <b>14.4%</b>                                           |
| <b>UCEC</b> | 372                                        | <b>12.4%</b>                                           |

Supplementary Table 4

| Gene      | BLCA     | BRCA     | COAD    | GBM     | HNSC     | KIRC  | LAML     | LUAD    | LUSC     | OV       | READ     | UCEC  | SumNonZero |
|-----------|----------|----------|---------|---------|----------|-------|----------|---------|----------|----------|----------|-------|------------|
| TMEM25    | 0.2439   | 0.060703 | 1       | 0       | 0.39032  | 0.32  | 0        | 0.20698 | 0.1676   | 0.19007  | 1        | 0.094 | 10         |
| ZNF135    | 0        | 0.34185  | 0.96867 | 0.33582 | 0.94194  | 0.436 | 0        | 0.54651 | 1        | 0.066781 | 0.97531  | 0.532 | 10         |
| ZNF354C   | 0.43902  | 0.46645  | 0.86988 | 0       | 0.62581  | 1     | 0.65464  | 0.48837 | 0.26816  | 0        | 0.7284   | 1     | 10         |
| ZNF415    | 0        | 0.13099  | 0.8     | 0.13184 | 1        | 0.328 | 0.27835  | 0.44651 | 0.47486  | 0        | 0.70988  | 0.138 | 10         |
| ZNF542    | 0.39024  | 0.20128  | 1       | 0       | 0.84194  | 0.33  | 0.10825  | 0.39535 | 0.51955  | 0        | 1        | 0.218 | 10         |
| ZNF671    | 1        | 0.38978  | 0.91807 | 0       | 0.79355  | 0.262 | 0        | 0.36512 | 0.56145  | 0.29795  | 0.9321   | 0.478 | 10         |
| ZSCAN18   | 0.38211  | 0.26837  | 1       | 0.1592  | 0.60323  | 0.148 | 0        | 0.29302 | 0.34637  | 0        | 0.64198  | 0.042 | 10         |
| ALDOC     | 0.31707  | 0.58147  | 0       | 0       | 0.30323  | 0.206 | 0.41753  | 0.27907 | 0.10056  | 0.38014  | 0        | 0.508 | 9          |
| CD40      | 0        | 0.82428  | 0.78313 | 0       | 0.2129   | 0.214 | 0.48454  | 0.34651 | 0.29888  | 0        | 1        | 0.4   | 9          |
| HIST1H3G  | 0.30081  | 0.5623   | 0.2     | 0       | 0.10645  | 0     | 0.34021  | 0.66977 | 0.2905   | 0        | 0.1358   | 0.444 | 9          |
| HOXB4     | 0.10569  | 1        | 0.19036 | 0       | 0.69355  | 0     | 0.26804  | 0.8     | 0.71229  | 0        | 0.24691  | 0.106 | 9          |
| PKIA      | 0.23577  | 0.6262   | 0.66747 | 0       | 0.51613  | 0     | 0.18557  | 0.52558 | 0.35475  | 0.42466  | 1        | 0     | 9          |
| SMO       | 0.47154  | 0.4377   | 0.39518 | 0       | 0.33226  | 0     | 0        | 0.51395 | 0.27933  | 0.29281  | 0.46914  | 0.086 | 9          |
| ZNF471    | 0        | 1        | 0.86506 | 0       | 1        | 1     | 0.17526  | 1       | 1        | 0        | 0.87037  | 0.352 | 9          |
| ZNF501    | 0.17886  | 1        | 0.17349 | 0       | 0.18065  | 0.358 | 0.07732  | 0.15581 | 0.083799 | 0        | 0        | 0.65  | 9          |
| ZNF502    | 0        | 1        | 0.28916 | 0       | 0.2871   | 0.214 | 0        | 0.43721 | 0.24022  | 0.18836  | 0.08642  | 0.638 | 9          |
| ZNF655    | 0.12195  | 0.15335  | 0.55904 | 0       | 0.074194 | 0     | 0        | 0.12791 | 0.2067   | 0.15753  | 1        | 0.14  | 9          |
| AKR1B1    | 0        | 0.63259  | 0.7494  | 0       | 0.032258 | 0     | 0.12371  | 0.40233 | 0.10615  | 0        | 0.74074  | 0.264 | 8          |
| CAPS      | 1        | 0        | 0.50843 | 0       | 0.65806  | 0.828 | 0        | 0.2907  | 0.37989  | 1        | 0.45062  | 0     | 8          |
| CDO1      | 1        | 0.80831  | 1       | 0       | 1        | 0     | 0        | 1       | 1        | 1        | 0        | 1     | 8          |
| FUZ       | 0.14634  | 0.2492   | 1       | 0       | 0.34516  | 0     | 0        | 0.15349 | 0.10615  | 0        | 0.58642  | 0.14  | 8          |
| HIST1H2BH | 0.30081  | 0.28115  | 0.2988  | 0       | 0.058065 | 0     | 0.097938 | 0.92326 | 0.2095   | 0        | 0        | 0.312 | 8          |
| HOXA9     | 0.56911  | 0.75719  | 0.25542 | 0       | 0.92258  | 0.22  | 0.19588  | 0       | 0        | 0        | 0.48765  | 0.716 | 8          |
| KLHL3     | 0        | 0.47604  | 0.51807 | 0       | 1        | 0.584 | 0        | 0.62093 | 0.32961  | 0        | 1        | 0.156 | 8          |
| LTBP3     | 0        | 0.16613  | 0.53253 | 0       | 0.5      | 1     | 0.45876  | 0       | 0        | 0.2226   | 1        | 0.39  | 8          |
| MGMT      | 0.15447  | 0.054313 | 0.35422 | 0       | 0.30968  | 0     | 0.1701   | 0.11628 | 0.13687  | 0        | 0.40741  | 0     | 8          |
| MPV17L    | 0.22764  | 0.13738  | 0.38795 | 0       | 0.46452  | 0     | 0        | 0.44186 | 0.18436  | 0        | 0.40741  | 0.362 | 8          |
| MT1E      | 0        | 0.377    | 0       | 0       | 0.48065  | 0.546 | 0        | 0.32093 | 0.50838  | 0.13699  | 0.098765 | 0.538 | 8          |
| NUPR1     | 0        | 0.38019  | 1       | 0       | 1        | 0     | 0        | 1       | 1        | 0.51541  | 1        | 1     | 8          |
| PTPN20B   | 0        | 1        | 1       | 0       | 1        | 0     | 0.30412  | 1       | 1        | 0        | 1        | 1     | 8          |
| RBP1      | 0.26016  | 0.11182  | 0.65783 | 0.11194 | 0.070968 | 0     | 0        | 0       | 0.053073 | 0.39041  | 1        | 0     | 8          |
| SPAG16    | 0        | 0.42173  | 0.39518 | 0       | 0.23871  | 0     | 0.14433  | 0.07907 | 0.027933 | 0        | 0.098765 | 0.254 | 8          |
| TSPYL5    | 0        | 1        | 1       | 0.9801  | 1        | 0.478 | 1        | 0       | 0        | 0        | 1        | 0.982 | 8          |
| WASF3     | 0.089431 | 0.23003  | 1       | 0       | 0.46129  | 0.316 | 0        | 0.34651 | 0        | 0        | 0.52469  | 0.136 | 8          |
| XKR6      | 0        | 1        | 0.6241  | 0       | 0.2      | 0.306 | 0.81443  | 0.57209 | 0.2486   | 0        | 0        | 0.496 | 8          |
| ZFP28     | 0        | 0.22684  | 0.68193 | 0       | 0.5      | 1     | 0        | 0.37442 | 0.19274  | 0        | 0.6358   | 0.096 | 8          |
| ZNF134    | 0        | 1        | 0.93012 | 0       | 0.72581  | 0.35  | 0        | 0.45116 | 0.3324   | 0        | 0.46914  | 0.228 | 8          |
| ZNF256    | 0.14634  | 0.063898 | 0.72771 | 0       | 0.45161  | 0     | 0        | 0.33953 | 0.20112  | 0        | 0.5679   | 0.094 | 8          |
| ZNF300    | 0        | 1        | 0.82169 | 0       | 0        | 1     | 0        | 1       | 0.18156  | 0.21747  | 0.71605  | 0.488 | 8          |
| ZNF350    | 0.097561 | 0        | 0.44337 | 0       | 0.46774  | 0.126 | 0        | 0.12558 | 0.22626  | 0        | 0.17901  | 0.066 | 8          |
| ZNF570    | 0.20325  | 0.054313 | 0.51325 | 0       | 0.50968  | 0.146 | 0        | 0.22791 | 0.18994  | 0        | 0.41975  | 0     | 8          |

|          |         |          |          |         |         |       |          |          |          |          |         |       |   |
|----------|---------|----------|----------|---------|---------|-------|----------|----------|----------|----------|---------|-------|---|
| ZNF577   | 0       | 1        | 0.50843  | 0.45771 | 0       | 0.602 | 0.28866  | 0.63721  | 0        | 0.25685  | 0       | 0.316 | 8 |
| ZNF625   | 0       | 0.063898 | 1        | 0       | 0.69355 | 0.106 | 0.16495  | 0.26512  | 0.42737  | 0        | 0.88889 | 0     | 8 |
| ALKBH3   | 0.11382 | 0.20447  | 0.12771  | 0       | 0       | 0     | 0        | 0.13488  | 0.072626 | 0        | 0.10494 | 0.444 | 7 |
| C1orf51  | 0       | 0.19489  | 0.72048  | 0       | 1       | 0.232 | 0        | 0        | 0.29609  | 0        | 0.78395 | 0.168 | 7 |
| C3orf14  | 0       | 0.12141  | 0.66506  | 0       | 0.24516 | 0.156 | 0        | 1        | 0.12291  | 0        | 0       | 0.494 | 7 |
| C7orf13  | 0.35772 | 0.13099  | 0.033735 | 0.88806 | 0.29355 | 0     | 0        | 0        | 0.10335  | 0        | 0       | 0.308 | 7 |
| CMBL     | 0       | 0.092652 | 0.2241   | 0       | 0       | 0     | 0        | 0.42558  | 0.036313 | 0.45548  | 0.21605 | 0.24  | 7 |
| CRISPLD1 | 0.39837 | 1        | 0        | 0       | 0.50645 | 0     | 0        | 0.1907   | 0.13408  | 0.2089   | 0       | 0.094 | 7 |
| CWH43    | 0.17886 | 0.17572  | 0.33976  | 0       | 1       | 0.126 | 0        | 0        | 1        | 0        | 0       | 0.148 | 7 |
| DMC1     | 0       | 1        | 0        | 0       | 0.29677 | 0     | 0.31443  | 0.35814  | 0.4581   | 0.20719  | 0       | 0.494 | 7 |
| DNALI1   | 0       | 0.42173  | 0        | 0       | 1       | 1     | 0        | 0.22791  | 1        | 0.47603  | 0       | 0.422 | 7 |
| GPX7     | 0       | 0.36102  | 0.53253  | 0       | 0.46452 | 0.314 | 0        | 0.36977  | 0.31285  | 0        | 0       | 0.084 | 7 |
| HPDL     | 0.39024 | 0.23642  | 0.11566  | 0.31343 | 0.2     | 0     | 0        | 0        | 0.15642  | 0        | 0       | 0.288 | 7 |
| HSPA2    | 1       | 0        | 0        | 1       | 0.3     | 0     | 0        | 1        | 1        | 0        | 1       | 1     | 7 |
| IFFO1    | 1       | 1        | 1        | 0       | 0       | 0     | 0        | 1        | 1        | 0        | 1       | 1     | 7 |
| L3MBTL4  | 0       | 1        | 0.61205  | 0       | 0.33548 | 0     | 0.26289  | 0.18372  | 0        | 0        | 0.5     | 0.156 | 7 |
| MAP9     | 0.38211 | 0.21725  | 0        | 0       | 0.59677 | 0.324 | 0        | 0.13488  | 0.20112  | 0        | 0       | 0.046 | 7 |
| MFSD7    | 0       | 0.42812  | 0.83614  | 0       | 0       | 0.604 | 0.39175  | 0.28605  | 0.60335  | 0        | 0.82099 | 0     | 7 |
| MRPS21   | 0.23577 | 0.34505  | 0        | 0       | 0.19355 | 0     | 0        | 0.15581  | 0.19553  | 0.57877  | 0       | 0.404 | 7 |
| MYEF2    | 0.35772 | 0        | 0.3494   | 0       | 0.75806 | 0     | 0.24742  | 0.062791 | 0.19274  | 0        | 0.24074 | 0     | 7 |
| NPTX2    | 0       | 1        | 0.80482  | 0       | 1       | 0     | 0        | 0.81628  | 1        | 0        | 0.77778 | 1     | 7 |
| NRSN2    | 0.34146 | 0.044728 | 0.28916  | 0       | 0.1129  | 0     | 0        | 0.053488 | 0        | 0        | 0.32716 | 0.09  | 7 |
| NSUN7    | 0       | 0.095847 | 0.15422  | 0.28358 | 0.26129 | 0.144 | 0        | 0        | 0.072626 | 0        | 0       | 0.052 | 7 |
| PCDHB2   | 0       | 0.61022  | 0        | 0       | 1       | 1     | 0        | 0        | 1        | 0.47432  | 0.64815 | 1     | 7 |
| PCDHB5   | 0       | 0.58786  | 0        | 0.26866 | 0.65806 | 1     | 0        | 1        | 1        | 0.55822  | 0       | 0     | 7 |
| RARRES3  | 0.4065  | 0.11182  | 0        | 0       | 0.26129 | 0     | 0        | 0.15116  | 0.28212  | 0.094178 | 0       | 0.252 | 7 |
| RPL39L   | 1       | 0.33546  | 0.63133  | 1       | 0.46129 | 0.238 | 0        | 0        | 0        | 0        | 1       | 0     | 7 |
| SLC16A5  | 0.33333 | 0.36741  | 0.096386 | 0       | 0.11935 | 0     | 0        | 0.20465  | 0.29609  | 0        | 0       | 0.4   | 7 |
| TMEM98   | 0       | 0.21406  | 0.096386 | 0       | 0.22581 | 0.076 | 0        | 0.13721  | 0.075419 | 0        | 0       | 0.108 | 7 |
| TRMT12   | 0.18699 | 0        | 0.33494  | 0       | 0.22258 | 0     | 0.07732  | 0        | 0.064246 | 0        | 0.3642  | 0.186 | 7 |
| UBXN10   | 0       | 0.095847 | 0.27952  | 0.83333 | 0.6     | 0.168 | 0        | 0.29535  | 0        | 0        | 0       | 0.08  | 7 |
| VAMP5    | 0.70732 | 1        | 0        | 0       | 0.69032 | 0     | 0.59794  | 0.77209  | 0.74581  | 0        | 0       | 1     | 7 |
| ZFP3     | 0       | 0        | 0.32289  | 0       | 0.3129  | 0     | 0.25258  | 0.28605  | 0.29888  | 0        | 0.08642 | 0.594 | 7 |
| ZFP82    | 0       | 0        | 0.85301  | 0.25622 | 0.84194 | 0     | 0        | 0.3093   | 0.43855  | 0        | 0.82099 | 0.28  | 7 |
| ZNF132   | 0.34959 | 1        | 0        | 0       | 1       | 0     | 0        | 0.53488  | 1        | 0.22774  | 0       | 1     | 7 |
| ZNF175   | 0.11382 | 0.14377  | 0        | 0       | 0.12581 | 0     | 0        | 0.21163  | 0.18994  | 0        | 0.16049 | 0.194 | 7 |
| ZNF214   | 0.1626  | 0.28435  | 0        | 0       | 0.58387 | 0     | 0.5567   | 0.28372  | 0.18436  | 0        | 0       | 0.41  | 7 |
| ZNF329   | 0.25203 | 0        | 0.30602  | 0       | 0.44839 | 0.112 | 0        | 0.5      | 0.35196  | 0        | 0.22222 | 0     | 7 |
| ZNF597   | 1       | 1        | 0        | 0       | 0       | 0     | 1        | 1        | 1        | 0        | 0.93827 | 1     | 7 |
| ZNF660   | 0.55285 | 0        | 0.83373  | 0       | 0.82581 | 0     | 0        | 0.49302  | 0.31564  | 0        | 0.7963  | 0.314 | 7 |
| ZNF667   | 0       | 1        | 0        | 0       | 0.95484 | 1     | 0.41237  | 0.65116  | 0.63687  | 0        | 0       | 0.44  | 7 |
| ZNF702P  | 0       | 0.12141  | 0.3253   | 0       | 0.81935 | 0.09  | 0.072165 | 0.25814  | 0.45251  | 0        | 0       | 0     | 7 |

|           |         |         |         |         |          |       |          |          |          |         |         |       |   |
|-----------|---------|---------|---------|---------|----------|-------|----------|----------|----------|---------|---------|-------|---|
| ZSCAN12   | 1       | 0       | 0       | 0       | 0.70323  | 0.466 | 0        | 1        | 0.45251  | 0       | 1       | 1     | 7 |
| ABO       | 0.21138 | 0.52396 | 0       | 0       | 0.46774  | 0     | 0        | 0.15116  | 0.28212  | 0       | 0       | 1     | 6 |
| ACAA2     | 0       | 0.36102 | 0.06988 | 0.28358 | 0        | 0     | 0        | 0        | 0.5419   | 0.18836 | 0       | 0.41  | 6 |
| ACOX2     | 0       | 1       | 0.20482 | 0       | 0        | 1     | 0.69072  | 0        | 0        | 1       | 0       | 1     | 6 |
| ACSS3     | 0       | 0.25559 | 0       | 0       | 0        | 0.08  | 0        | 0.34651  | 0.48603  | 0.14041 | 0       | 0.386 | 6 |
| ADHFE1    | 0.58537 | 0.22045 | 0       | 0       | 0.43548  | 0     | 0        | 0.31395  | 0.35754  | 0       | 0       | 0.574 | 6 |
| AMT       | 0       | 0.89776 | 1       | 0       | 0        | 1     | 0.43814  | 0        | 0        | 0.86473 | 0       | 1     | 6 |
| BASP1     | 0.18699 | 0       | 0       | 0.4801  | 0.25806  | 0     | 0.10825  | 0.33953  | 0        | 0       | 0       | 0.116 | 6 |
| BNIP3     | 0.30894 | 0       | 0.58554 | 0       | 0.18065  | 0.27  | 0        | 0.067442 | 0        | 0       | 0.41358 | 0     | 6 |
| C20orf151 | 1       | 1       | 0       | 0       | 0        | 0.942 | 0        | 1        | 1        | 0       | 0       | 1     | 6 |
| C2orf43   | 0.12195 | 0.13099 | 0       | 0       | 0.14839  | 0     | 0        | 0        | 0.1648   | 0.23116 | 0       | 0.55  | 6 |
| CARD11    | 0       | 0       | 0.66506 | 0       | 0.54516  | 0     | 0        | 0.27209  | 0.29609  | 0       | 0.67284 | 1     | 6 |
| CBLC      | 1       | 1       | 0       | 0       | 0        | 0     | 0        | 1        | 1        | 1       | 0       | 1     | 6 |
| CBR1      | 0.10569 | 0.48882 | 0       | 0       | 0.077419 | 0     | 0.37113  | 0        | 0.097765 | 0       | 0       | 0.106 | 6 |
| CCDC106   | 0       | 0       | 1       | 0       | 1        | 0.16  | 0        | 1        | 0        | 0       | 1       | 0.078 | 6 |
| CHFR      | 0       | 0       | 1       | 0       | 0.31935  | 0     | 0.056701 | 0        | 0.25698  | 0       | 1       | 0.134 | 6 |
| CHST10    | 0.33333 | 0       | 0       | 0       | 0.3129   | 0.134 | 0        | 0.13953  | 0.092179 | 0       | 0.75309 | 0     | 6 |



Supplementary Table 5

| Gene     | BLCA    | BRCA     | COAD     | GBM     | HNSC     | KIRC  | LAML     | LUAD    | LUSC    | OV      | READ     | UCEC  | SumNonZero |
|----------|---------|----------|----------|---------|----------|-------|----------|---------|---------|---------|----------|-------|------------|
| MAGEA4   | 0.42276 | 0.18211  | 0.36627  | 0       | 0.54839  | 0     | 0        | 0.29302 | 0.59218 | 0.60274 | 0.40123  | 0.35  | 9          |
| BATF     | 0.84553 | 0.90096  | 0.50843  | 0.24378 | 0        | 0.334 | 0        | 0.56512 | 0       | 0.42979 | 0        | 1     | 8          |
| DAPP1    | 0       | 0.77955  | 0.45542  | 0       | 0        | 0.268 | 0        | 0.69767 | 1       | 1       | 0.41358  | 0.372 | 8          |
| FOXRED2  | 0.39837 | 0.41214  | 0.45542  | 0       | 0.37419  | 0     | 0        | 0.3     | 0.52514 | 0.3476  | 0        | 0.466 | 8          |
| ACY1     | 0.36585 | 0        | 0.6241   | 0       | 0.19032  | 0     | 0        | 0.23023 | 0.31844 | 0.46233 | 0.60494  | 0     | 7          |
| BST2     | 0       | 0        | 0.31807  | 1       | 0.75806  | 0.92  | 0        | 0.47442 | 0       | 0       | 0.30247  | 0.534 | 7          |
| CALML4   | 0       | 0.18211  | 0        | 0       | 0.19677  | 0.584 | 0        | 0.43953 | 0.43296 | 0.26884 | 0        | 0.402 | 7          |
| MAGEA10  | 0.64228 | 0.26198  | 0        | 0       | 0.6871   | 0     | 0        | 0.32093 | 0.38827 | 0       | 0.42593  | 0.464 | 7          |
| C2       | 0       | 0        | 1        | 0       | 0        | 0.384 | 0.25773  | 0       | 0       | 0.56164 | 1        | 0.186 | 6          |
| CALML5   | 0.17073 | 0.32268  | 0        | 0       | 0.35161  | 0     | 0        | 0.15116 | 0.32123 | 0.32021 | 0        | 0     | 6          |
| CES3     | 0       | 0.28435  | 0        | 0       | 0.1871   | 0.26  | 0        | 0.36279 | 0.28212 | 0       | 0        | 1     | 6          |
| GPR171   | 0       | 0.12141  | 0        | 0       | 0.33871  | 0.19  | 0        | 0.2186  | 0.34358 | 0.11473 | 0        | 0     | 6          |
| HAL      | 0.25203 | 0        | 0        | 0       | 0        | 0     | 0        | 0.49767 | 0.3324  | 0.44521 | 0.18519  | 0.444 | 6          |
| IL20RB   | 0.36585 | 0.057508 | 0.21446  | 0       | 0        | 0.33  | 0        | 0.3     | 0       | 0       | 0        | 0.114 | 6          |
| NAIF1    | 0       | 0.57188  | 0        | 0       | 0.4871   | 0     | 0.056701 | 0.35814 | 0.53911 | 0.29452 | 0        | 0     | 6          |
| OAS2     | 0       | 0        | 1        | 0       | 0        | 0.316 | 0        | 0.77442 | 0.98324 | 0.6387  | 0        | 0.436 | 6          |
| PADI3    | 0       | 0.19808  | 0.21205  | 0       | 0.29032  | 0     | 0        | 0       | 0       | 0.5976  | 0.41975  | 0.434 | 6          |
| PNLDC1   | 0.33333 | 0.1246   | 0        | 0       | 0.39355  | 0     | 0        | 0.11628 | 0.34637 | 0.25685 | 0        | 0     | 6          |
| C16orf54 | 0       | 0.23003  | 0.048193 | 0       | 0        | 0.202 | 0        | 0       | 0       | 0       | 0.061728 | 0.216 | 5          |
| C6orf15  | 0       | 0.17572  | 0.3012   | 0       | 0        | 0     | 0        | 0       | 0       | 0.21404 | 0.32716  | 0.124 | 5          |
| CD3D     | 0       | 0.13099  | 0.096386 | 0       | 0        | 0.37  | 0        | 0       | 0       | 0.21575 | 0        | 0.162 | 5          |
| CEL      | 0.6748  | 0.23003  | 0.5253   | 0       | 0        | 0     | 0        | 0.2093  | 0       | 0       | 0        | 0.284 | 5          |
| CFB      | 0       | 0        | 0.61446  | 0       | 0        | 0.406 | 0        | 0       | 0       | 0.79966 | 1        | 0.56  | 5          |
| CNTD1    | 0       | 0        | 0.11084  | 0       | 0.18387  | 0     | 0        | 0.2     | 0.29888 | 0.375   | 0        | 0     | 5          |
| ELF5     | 0       | 0.69329  | 0.35422  | 0       | 0.25484  | 0     | 0        | 0       | 0       | 0.21233 | 0.43827  | 0     | 5          |
| EPHX4    | 0       | 0.34185  | 0        | 0       | 0        | 0     | 0        | 0.67442 | 0.47207 | 0.59589 | 0.67284  | 0     | 5          |
| F2       | 0.21138 | 0        | 0.6747   | 0       | 0.2      | 0     | 0        | 0.28372 | 0.15922 | 0       | 0        | 0     | 5          |
| FKBP10   | 0       | 0        | 0.22892  | 0       | 0        | 0.31  | 0        | 0.27209 | 0.49721 | 0       | 0.33333  | 0     | 5          |
| GBP4     | 0       | 0.5016   | 0        | 0       | 0.72581  | 1     | 0        | 0.52558 | 0       | 0       | 0.69753  | 0     | 5          |
| GPX2     | 0.69919 | 0        | 0.58072  | 0       | 0        | 0     | 0        | 0.55814 | 0.80726 | 0       | 0        | 0.296 | 5          |
| IL2RB    | 0.21951 | 0.15016  | 0        | 0       | 0        | 0.2   | 0        | 0.43953 | 0       | 0       | 0        | 0.286 | 5          |
| LAT      | 0.22764 | 0        | 0.1494   | 0       | 0        | 1     | 0        | 0       | 0       | 0       | 0.2284   | 0.116 | 5          |
| MAGEC2   | 0       | 0.28754  | 0        | 0       | 0.10968  | 0     | 0        | 0       | 0       | 0.71918 | 0.10494  | 0.156 | 5          |
| MSLN     | 0       | 0.2524   | 0.85301  | 0       | 0.32258  | 0     | 0        | 0.58605 | 0.12849 | 0       | 0        | 0     | 5          |
| PAGE2    | 0.4878  | 0        | 0        | 0       | 0.23548  | 0     | 0        | 0.47209 | 0.31285 | 0       | 0        | 0.31  | 5          |
| PER3     | 0.20325 | 0        | 0        | 0       | 0        | 0     | 0        | 0.52791 | 0.3743  | 0.42295 | 0        | 0.198 | 5          |
| S100P    | 0       | 0.71885  | 0        | 0       | 0.22903  | 0     | 0        | 0       | 0.39944 | 0.54623 | 0        | 0.206 | 5          |
| SYCP2    | 0.19512 | 1        | 0        | 0       | 0.30323  | 0     | 0        | 0.15814 | 0.2067  | 0       | 0        | 0     | 5          |
| TBC1D10C | 0       | 0.28115  | 0        | 0.41542 | 0.12903  | 0     | 0        | 0       | 0       | 0.25856 | 0        | 0.11  | 5          |
| TDRD1    | 0       | 0        | 0        | 0       | 0.067742 | 0     | 0        | 0.15814 | 0.10615 | 0.25856 | 0.08642  | 0     | 5          |
| ZNF556   | 0       | 0        | 0.28916  | 0       | 0        | 0     | 0.072165 | 0.15814 | 0.70112 | 0       | 0.21605  | 0     | 5          |

|          |         |          |         |         |         |       |          |         |          |          |         |       |   |
|----------|---------|----------|---------|---------|---------|-------|----------|---------|----------|----------|---------|-------|---|
| ZNF572   | 0.45528 | 0.377    | 0       | 0       | 0.7129  | 0     | 0        | 0.54651 | 0.82961  | 0        | 0       | 0     | 5 |
| ABCC2    | 0       | 0        | 0.58072 | 0       | 0       | 0.772 | 0        | 0.52791 | 0.35196  | 0        | 0       | 0     | 4 |
| ACSL5    | 0.19512 | 0        | 0.39036 | 0       | 0       | 0     | 0        | 0.59767 | 0        | 0        | 0.55556 | 0     | 4 |
| AGMAT    | 0       | 0        | 0       | 0       | 0.74516 | 0     | 0.2732   | 0       | 0        | 0.80137  | 0       | 0.612 | 4 |
| BIN2     | 0       | 0.1853   | 0       | 0.37562 | 0       | 0.29  | 0        | 0       | 0        | 0        | 0       | 0.248 | 4 |
| BRDT     | 0.21138 | 0        | 0       | 0       | 1       | 0     | 0        | 0.73256 | 0.22905  | 0        | 0       | 0     | 4 |
| C11orf16 | 0       | 0        | 0       | 0       | 0.31613 | 0     | 0        | 0.49302 | 0.20391  | 0.36986  | 0       | 0     | 4 |
| C11orf9  | 0       | 0        | 0.34217 | 0       | 0       | 0     | 0        | 0.26977 | 0        | 0.38356  | 0.24691 | 0     | 4 |
| C1orf64  | 0       | 0.70927  | 0       | 0       | 0       | 0     | 0        | 0.33256 | 0        | 0.35788  | 0       | 0.466 | 4 |
| CCND1    | 0       | 0.22045  | 0       | 0.10945 | 0       | 0     | 0.30928  | 0       | 0        | 0        | 0       | 0.312 | 4 |
| CCR7     | 0       | 0.29393  | 0       | 0       | 0       | 0.484 | 0        | 0       | 0        | 0.15411  | 0       | 0.168 | 4 |
| CP       | 0.26016 | 0.3099   | 0       | 0       | 0       | 0     | 0        | 0.68605 | 0        | 0.88356  | 0       | 0     | 4 |
| CSTA     | 0       | 0        | 0       | 0       | 0       | 0.06  | 0        | 0       | 1        | 0.58733  | 0       | 0.364 | 4 |
| CTSE     | 0       | 0        | 0       | 0       | 0.24516 | 0.588 | 0        | 0       | 0        | 0.21575  | 0       | 0.286 | 4 |
| DENND2D  | 0       | 0.8722   | 0       | 0.54975 | 0       | 0.968 | 0        | 0.50233 | 0        | 0        | 0       | 0     | 4 |
| DOK2     | 0       | 0.36102  | 0       | 0       | 0       | 0.538 | 0        | 0       | 0        | 0.37671  | 0       | 0.144 | 4 |
| EPS8L3   | 0       | 0        | 0       | 0       | 0       | 0.81  | 0        | 0.36977 | 0.15642  | 0        | 0       | 0.36  | 4 |
| FUT6     | 0       | 0.3131   | 0.7253  | 0       | 0       | 0     | 0        | 0.37674 | 0        | 0        | 0       | 0.456 | 4 |
| FXVD4    | 0       | 0.29073  | 0       | 0       | 0       | 0     | 0        | 0.85116 | 0        | 0.46062  | 0       | 0.602 | 4 |
| GPT      | 0.37398 | 0        | 0       | 0       | 0       | 0     | 0.015464 | 0.34186 | 0        | 0        | 0       | 0.452 | 4 |
| IFITM1   | 0       | 0        | 0       | 0       | 0.86774 | 0.64  | 0        | 0       | 0        | 0        | 0.7716  | 0.756 | 4 |
| INSL6    | 0       | 0.36422  | 0       | 0       | 0.13548 | 0     | 0        | 0.17209 | 0        | 0.25514  | 0       | 0     | 4 |
| KAZALD1  | 0       | 0        | 0       | 0.43781 | 0.26129 | 0     | 0        | 0       | 0        | 0.80651  | 0       | 0.818 | 4 |
| KCNJ11   | 0       | 0        | 0       | 0       | 0       | 0.268 | 0        | 0.32326 | 0.49162  | 0        | 0       | 0.52  | 4 |
| KRT80    | 0       | 0.28754  | 0       | 0       | 0       | 0.388 | 0        | 0.39302 | 0        | 0.31164  | 0       | 0     | 4 |
| LGALS4   | 0       | 0        | 0       | 0       | 0.18387 | 0.834 | 0        | 0.30698 | 0.12291  | 0        | 0       | 0     | 4 |
| LPIN2    | 0       | 0.26837  | 0       | 0       | 0       | 0     | 0        | 0.53721 | 0        | 0        | 0.23457 | 0.206 | 4 |
| LY75     | 0.69919 | 0        | 0       | 0.22139 | 0       | 0     | 0        | 0       | 0        | 1        | 0       | 0.38  | 4 |
| MIA      | 0       | 0        | 0       | 0       | 0       | 0     | 0        | 0.26744 | 0.38268  | 0.81336  | 0       | 0.3   | 4 |
| MKRN3    | 0       | 0        | 0.46024 | 0       | 0       | 0     | 0        | 0.3907  | 0        | 0        | 0.2284  | 0.54  | 4 |
| NCF2     | 0       | 0        | 0.53012 | 0       | 0       | 0.34  | 0        | 0       | 0        | 0.37842  | 0       | 0.072 | 4 |
| NCF4     | 0       | 0.15974  | 0       | 0.16418 | 0       | 0     | 0        | 0       | 0        | 0.083904 | 0       | 0.206 | 4 |
| NLRP2    | 0       | 0        | 0       | 0       | 0.31935 | 0     | 0        | 0.46977 | 0.63687  | 0.62158  | 0       | 0     | 4 |
| PPP1R14D | 0       | 0        | 0       | 0       | 0       | 0.598 | 0        | 0.49767 | 0.14246  | 0.28425  | 0       | 0     | 4 |
| PTPN22   | 0       | 0        | 0       | 0.37313 | 0       | 0.386 | 0        | 0       | 0        | 0.38527  | 0       | 0.274 | 4 |
| PTPN7    | 0       | 0.095847 | 0       | 0       | 0       | 0.298 | 0        | 0       | 0        | 0.2089   | 0       | 0.274 | 4 |
| RAPSN    | 0       | 0.17891  | 0       | 0       | 0       | 0     | 0        | 0       | 0.54749  | 0.44521  | 0       | 0.208 | 4 |
| RDH5     | 0       | 0        | 0       | 0.47015 | 0       | 0.826 | 0        | 0.55349 | 0.39106  | 0        | 0       | 0     | 4 |
| RLBP1    | 0       | 0        | 0       | 0.65672 | 0.56452 | 0     | 0        | 0.45814 | 0.59777  | 0        | 0       | 0     | 4 |
| S100A5   | 0       | 0        | 0       | 0       | 0       | 0     | 0        | 0.1186  | 0.041899 | 0.41438  | 0       | 0.078 | 4 |
| SERPINF1 | 0       | 0        | 0       | 0       | 0.15806 | 0.072 | 0        | 0.18605 | 0.30168  | 0        | 0       | 0     | 4 |
| SLC28A2  | 0       | 0        | 0.2747  | 0       | 0       | 0     | 0        | 0.36744 | 0        | 0.15925  | 0       | 0.258 | 4 |

|          |         |         |         |         |         |       |   |         |         |          |         |       |   |
|----------|---------|---------|---------|---------|---------|-------|---|---------|---------|----------|---------|-------|---|
| SNX20    | 0       | 0.23003 | 0.30843 | 0       | 0       | 0     | 0 | 0       | 0       | 0.20205  | 0       | 0.148 | 4 |
| TFF1     | 0       | 0.7476  | 0.37349 | 0       | 0       | 0     | 0 | 0       | 0       | 0        | 0.2037  | 0.334 | 4 |
| TMEM45B  | 0.46341 | 0       | 0.4241  | 0       | 0       | 0     | 0 | 0.3     | 0.12849 | 0        | 0       | 0     | 4 |
| TRAF1    | 0.25203 | 0       | 0.21687 | 0       | 0       | 0     | 0 | 0       | 0       | 0.48801  | 0       | 0.204 | 4 |
| UGT1A10  | 0       | 0       | 0       | 0       | 0.3871  | 0.154 | 0 | 0.24651 | 0.35475 | 0        | 0       | 0     | 4 |
| AGT      | 0       | 0       | 0.30843 | 0       | 0       | 0.792 | 0 | 0       | 0       | 0        | 0.34568 | 0     | 3 |
| ALOX12   | 0       | 0       | 0       | 0       | 0.23871 | 0     | 0 | 0       | 0.32682 | 0.27911  | 0       | 0     | 3 |
| ALPPL2   | 0       | 0       | 0.17349 | 0       | 0       | 0     | 0 | 0.35814 | 0       | 0.52226  | 0       | 0     | 3 |
| ARL14    | 0       | 0.26837 | 0       | 0       | 0       | 0     | 0 | 0.53953 | 0.67598 | 0        | 0       | 0     | 3 |
| BEST3    | 0       | 0.68051 | 0       | 0.63184 | 0       | 0     | 0 | 0       | 0       | 0        | 0       | 0.426 | 3 |
| C12orf40 | 0       | 0.10863 | 0       | 0       | 0.17419 | 0     | 0 | 0       | 0.20112 | 0        | 0       | 0     | 3 |
| CAPN9    | 0       | 0       | 0.22169 | 0       | 0       | 0     | 0 | 0       | 0       | 0.32534  | 0.32099 | 0     | 3 |
| CARD14   | 0       | 0       | 0.90602 | 0       | 0       | 0.472 | 0 | 0.41163 | 0       | 0        | 0       | 0     | 3 |
| CASP8    | 0       | 0       | 0       | 0       | 0       | 0.962 | 0 | 0.84419 | 0       | 0        | 0       | 1     | 3 |
| CCDC109B | 0       | 0.7508  | 0       | 0.60199 | 0       | 0.704 | 0 | 0       | 0       | 0        | 0       | 0     | 3 |
| CCL5     | 0       | 0.20128 | 0       | 0       | 0       | 0     | 0 | 0       | 0       | 0.082192 | 0       | 0.166 | 3 |
| CD5      | 0       | 0       | 0       | 0       | 0       | 0.346 | 0 | 0       | 0       | 0.40925  | 0       | 0.236 | 3 |

Supplementary Table 6

| Gene      | BLCA    | BRCA    | COAD    | GBM     | HNSC    | KIRC   | LAML    | LUAD    | LUSC    | OV     | READ    | UCEC    | SumNonZero |
|-----------|---------|---------|---------|---------|---------|--------|---------|---------|---------|--------|---------|---------|------------|
| TMEM25    | 4.9629  | 2.3214  |         | 0       | 2.5619  | 2.554  | 0       | 2.0315  | 1.9755  | 1.712  |         | 2.1877  | 10         |
| ZNF135    | 0       | 3.08    | 4.6306  | 4.8473  | 3.8038  | 2.0882 | 0       | 3.4496  |         | 2.5269 | 10.1204 | 6.2999  | 10         |
| ZNF354C   | 8.8522  | 2.034   | 5.7491  | 0       | 4.0254  |        | 5.4091  | 1.9059  | 2.7876  | 0      | 4.188   |         | 10         |
| ZNF415    | 0       | 2.3543  | 5.2411  | 2.5323  |         | 2.0386 | 3.791   | 2.6187  | 3.0018  | 0      | 3.9336  | 1.896   | 10         |
| ZNF542    | 5.1227  | 3.8443  |         | 0       | 3.6423  | 2.131  | 2.4358  | 2.745   | 3.2964  | 0      |         | 2.3793  | 10         |
| ZNF671    |         | 3.5232  | 1.4972  | 0       | 2.1518  | 2.0315 | 0       | 2.1517  | 1.93    | 2.3283 | 1.8826  | 4.3041  | 10         |
| ZSCAN18   | 3.9264  | 2.925   |         |         | 2.9995  | 2.4256 | 0       | 2.7589  | 2.726   | 0      | 3.1546  | 2.5483  | 10         |
| ALDOC     | 2.2257  | 3.666   | 0       | 0       | 3.4461  | 3.9404 | 2.1322  | 1.7433  | 2.9785  | 3.583  | 0       | 2.7927  | 9          |
| CD40      | 0       | 1.642   | 1.988   | 0       | 1.8215  | 1.5798 | 2.1599  | 1.9194  | 2.1344  | 0      |         | 1.8948  | 9          |
| HIST1H3G  | 9.0048  | 19.0385 | 11.6388 | 0       | 5.5245  | 0      | 14.3751 | 11.1234 | 25.2158 | 0      | 10.1933 | 9.9414  | 9          |
| HOXB4     | 2.4565  |         | 3.2552  | 0       | 9.8028  | 0      | 31.8709 | 2.7194  | 2.4948  | 0      | 2.9554  | 6.7129  | 9          |
| SMO       | 3.0344  | 2.6971  | 2.0091  | 0       | 2.4891  | 0      | 0       | 2.246   | 2.7464  | 1.8628 | 2.0633  | 2.7471  | 9          |
| ZNF471    | 0       |         | 5.9848  | 0       |         |        | 2.9968  |         |         | 0      | 7.5064  | 2.771   | 9          |
| ZNF501    | 2.1432  |         | 2.2014  | 0       | 3.0129  | 1.4343 | 4.0526  | 2.8573  | 4.0161  | 0      | 0       | 4.2386  | 9          |
| ZNF502    | 0       |         | 2.9616  | 0       | 2.6217  | 1.4899 | 0       | 2.5908  | 5.1255  | 3.3838 | 2.2123  | 6.0021  | 9          |
| ZNF655    | 4.8696  | 2.8059  | 2.3455  | 0       | 1.5122  | 0      | 0       | 1.4747  | 1.5837  | 2.2547 |         | 2.4927  | 9          |
| AKR1B1    | 0       | 1.5971  | 1.7356  | 0       | 3.3458  | 0      | 5.0755  | 1.9818  | 2.4404  | 0      | 2.4531  | 3.1501  | 8          |
| CAPS      |         | 0       | 3.2399  | 0       | 2.4731  | 2.5122 | 0       | 4.4824  | 2.6832  |        | 2.5607  | 0       | 8          |
| CDO1      |         | 3.3158  |         | 0       |         | 0      | 0       |         |         |        | 0       |         | 8          |
| FUZ       | 2.1737  | 1.548   |         | 0       | 2.8626  | 0      | 0       | 1.8934  | 2.7837  | 0      | 2.6815  | 3.0091  | 8          |
| HIST1H2BH | 12.7464 | 9.443   | 4.1287  | 0       | 5.5142  | 0      | 50.0786 | 5.3012  | 8.8422  | 0      | 0       | 6.5244  | 8          |
| HOXA9     | 17.0205 | 2.5771  | 3.0735  | 0       | 17.2267 | 2.427  | 49.4786 | 0       | 0       | 0      | 4.6334  | 9.3592  | 8          |
| KLHL3     | 0       | 1.4373  | 3.1775  | 0       |         | 1.6214 | 0       | 1.5259  | 1.4925  | 0      |         | 3.7792  | 8          |
| LTBP3     | 0       | 1.8914  | 1.5275  | 0       | 2.0994  |        | 3.5892  | 0       | 0       | 1.4539 |         | 2.0718  | 8          |
| MGMT      | 4.8826  | 3.1205  | 3.5908  | 0       | 3.3857  | 0      | 8.258   | 1.7839  | 3.1644  | 0      | 3.5994  | 0       | 8          |
| MPV17L    | 3.7945  | 7.4395  | 5.215   | 0       | 6.6867  | 0      | 0       | 3.4483  | 5.3426  | 0      | 6.0448  | 7.9446  | 8          |
| MT1E      | 0       | 3.4485  | 0       | 0       | 3.2224  | 2.5976 | 0       | 2.3995  | 3.3405  | 4.1687 | 4.3195  | 4.5042  | 8          |
| NUPR1     | 0       | 1.5026  |         | 0       |         | 0      | 0       |         |         | 2.2043 |         |         | 8          |
| PKIA      | 2.3969  | 2.2391  | 5.2298  | 0       | 2.313   | 0      | 0       | 2.2372  | 2.3483  | 2.14   |         | 0       | 8          |
| PTPN20B   | 0       |         |         | 0       |         | 0      | 57.9802 |         |         | 0      |         |         | 8          |
| RBP1      | 2.1801  | 3.2273  | 3.4707  | 17.0159 | 3.419   | 0      | 0       | 0       | 5.11    | 1.7748 |         | 0       | 8          |
| SPAG16    | 0       | 3.0094  | 5.1616  | 0       | 3.2156  | 0      | 14.4883 | 2.6784  | 9.8953  | 0      | 2.9413  | 10.0731 | 8          |
| TSPYL5    | 0       |         |         | 9.9698  |         | 1.7302 |         | 0       | 0       | 0      |         | 1.7332  | 8          |
| WASF3     | 3.5186  | 3.4534  |         | 0       | 1.9944  | 1.5247 | 0       | 1.9996  | 0       | 0      | 4.2528  | 3.0359  | 8          |
| XKR6      | 0       |         | 15.6493 | 0       | 4.4505  | 2.3633 | 20.6124 | 3.326   | 4.2689  | 0      | 0       | 7.6174  | 8          |
| ZFP28     | 0       | 1.6503  | 4.2715  | 0       | 2.6362  |        | 0       | 1.8288  | 2.9398  | 0      | 3.5112  | 4.71    | 8          |
| ZNF134    | 0       |         | 2.7276  | 0       | 1.5788  | 1.3756 | 0       | 1.332   | 1.4581  | 0      | 3.2632  | 1.4327  | 8          |
| ZNF256    | 3.886   | 2.2112  | 6.1406  | 0       | 2.9848  | 0      | 0       | 2.8029  | 3.3827  | 0      | 4.7559  | 3.2415  | 8          |
| ZNF300    | 0       |         | 5.8085  | 0       | 0       |        | 0       |         | 4.6007  | 3.668  | 4.6397  | 11.0533 | 8          |
| ZNF350    | 2.1049  | 0       | 3.2113  | 0       | 2.7641  | 1.6719 | 0       | 1.6127  | 2.1557  | 0      | 1.704   | 1.6267  | 8          |
| ZNF570    | 4.3263  | 1.5363  | 5.8058  | 0       | 3.3898  | 1.7341 | 0       | 1.9343  | 3.4958  | 0      | 2.4234  | 0       | 8          |

|          |          |         |        |        |         |         |         |        |        |        |         |         |   |
|----------|----------|---------|--------|--------|---------|---------|---------|--------|--------|--------|---------|---------|---|
| ZNF577   | 0        |         | 2.9024 | 1.8252 | 0       | 1.9835  | 1.5593  | 1.7022 | 0      | 1.5655 | 0       | 1.6656  | 8 |
| ZNF625   | 0        | 2.5242  |        | 0      | 3.7309  | 1.768   | 2.6711  | 3.1594 | 2.8082 | 0      | 11.5292 | 0       | 8 |
| ALKBH3   | 1.82     | 2.7251  | 2.118  | 0      | 0       | 0       | 0       | 2.2687 | 2.9717 | 0      | 3.8863  | 4.9867  | 7 |
| C1orf51  | 0        | 2.6297  | 2.8115 | 0      |         | 1.8866  | 0       | 0      | 3.2193 | 0      | 2.6719  | 2.2292  | 7 |
| C3orf14  | 0        | 3.2888  | 5.0399 | 0      | 3.0688  | 2.4196  | 0       |        | 5.4927 | 0      | 0       | 2.9028  | 7 |
| C7orf13  | 4.1191   | 3.6386  | 2.9218 | 4.6517 | 3.7193  | 0       | 0       | 0      | 2.5444 | 0      | 0       | 5.587   | 7 |
| CRIBL    | 0        | 8.0516  | 2.1478 | 0      | 0       | 0       | 0       | 3.4994 | 4.1604 | 3.1573 | 3.8687  | 2.8975  | 7 |
| CRISPLD1 | 3.1782   |         | 0      | 0      | 3.3963  | 0       | 0       | 4.3067 | 2.805  | 3.5034 | 0       | 7.1833  | 7 |
| CWH43    | 103.7874 | 84.0701 | 30.767 | 0      |         | 33.5786 | 0       | 0      |        | 0      | 0       | 13.5473 | 7 |
| DMC1     | 0        |         | 0      | 0      | 2.429   | 0       | 3.0052  | 2.4719 | 3.4096 | 5.0873 | 0       | 3.2679  | 7 |
| DNALI1   | 0        | 10.5954 | 0      | 0      |         |         | 0       | 5.1224 |        | 4.8782 | 0       | 4.2038  | 7 |
| GPX7     | 0        | 1.8058  | 2.1679 | 0      | 1.8593  | 1.7313  | 0       | 2.1932 | 2.8696 | 0      | 0       | 2.4863  | 7 |
| HPDL     | 9.9452   | 3.7085  | 3.5893 | 2.5644 | 6.4528  | 0       | 0       | 0      | 4.4748 | 0      | 0       | 4.5193  | 7 |
| HSPA2    |          | 0       | 0      |        | 3.0938  | 0       | 0       |        |        | 0      |         |         | 7 |
| IFFO1    |          |         |        | 0      | 0       | 0       | 0       |        |        | 0      |         |         | 7 |
| L3MBTL4  | 0        |         | 2.3812 | 0      | 3.1686  | 0       | 8.8576  | 1.9013 | 0      | 0      | 6.0358  | 3.3668  | 7 |
| MAP9     | 4.5812   | 3.253   | 0      | 0      | 4.0262  | 2.4787  | 0       | 1.8754 | 1.9976 | 0      | 0       | 5.6257  | 7 |
| MFSD7    | 0        | 4.0222  | 2.1309 | 0      | 0       | 2.2388  | 2.1834  | 2.2014 | 1.7742 | 0      | 1.699   | 0       | 7 |
| MRPS21   | 2.42     | 1.7729  | 0      | 0      | 1.5458  | 0       | 0       | 1.3818 | 1.3231 | 1.2406 | 0       | 2.1498  | 7 |
| MYEF2    | 4.6376   | 0       | 7.2273 | 0      | 3.653   | 0       | 10.699  | 6.0717 | 3.6829 | 0      | 8.2468  | 0       | 7 |
| NPTX2    | 0        |         | 5.521  | 0      |         | 0       | 0       | 3.2108 |        | 0      | 12.7081 |         | 7 |
| NRSN2    | 2.6982   | 1.788   | 2.0456 | 0      | 1.8939  | 0       | 0       | 2.4846 | 0      | 0      | 1.6171  | 1.5447  | 7 |
| NSUN7    | 0        | 7.4734  | 3.3461 | 6.9397 | 6.0018  | 5.2114  | 0       | 0      | 4.313  | 0      | 0       | 10.6486 | 7 |
| PCDHB2   | 0        | 3.3054  | 0      | 0      |         |         | 0       | 0      |        | 3.5111 | 2.0332  |         | 7 |
| PCDHB5   | 0        | 2.2158  | 0      | 8.0894 | 4.0946  |         | 0       |        |        | 4.2873 | 0       | 0       | 7 |
| RARRES3  | 3.3052   | 4.953   | 0      | 0      | 3.2983  | 0       | 0       | 2.8392 | 1.8676 | 4.305  | 0       | 2.9231  | 7 |
| RPL39L   |          | 2.9489  | 7.1243 |        | 5.3457  | 1.8523  | 0       | 0      | 0      | 0      |         | 0       | 7 |
| SLC16A5  | 3.4256   | 3.1643  | 2.4808 | 0      | 2.2027  | 0       | 0       | 1.9923 | 2.0844 | 0      | 0       | 4.279   | 7 |
| TMEM98   | 0        | 2.3928  | 1.5762 | 0      | 1.8577  | 2.7841  | 0       | 2.364  | 3.4339 | 0      | 0       | 3.3787  | 7 |
| TRMT12   | 1.3348   | 0       | 2.5553 | 0      | 1.9083  | 0       | 1.4015  | 0      | 1.734  | 0      | 2.259   | 3.1485  | 7 |
| UBXN10   | 0        | 5.5727  | 2.9411 | 8.7534 | 3.0688  | 2.1574  | 0       | 2.5846 | 0      | 0      | 0       | 3.0549  | 7 |
| VAMP5    | 2.2211   |         | 0      | 0      | 1.3952  | 0       | 3.3247  | 1.6445 | 1.9622 | 0      | 0       |         | 7 |
| ZFP3     | 0        | 0       | 2.79   | 0      | 3.0497  | 0       | 2.4865  | 2.0099 | 2.8483 | 0      | 1.8358  | 4.5334  | 7 |
| ZFP82    | 0        | 0       | 3.3156 | 2.1374 | 3.5594  | 0       | 0       | 2.6207 | 3.9837 | 0      | 2.7154  | 4.2694  | 7 |
| ZNF132   | 2.121    |         | 0      | 0      |         | 0       | 0       | 1.9473 |        | 1.9468 | 0       |         | 7 |
| ZNF175   | 3.5821   | 2.5014  | 0      | 0      | 2.0408  | 0       | 0       | 1.7456 | 2.2993 | 0      | 3.4849  | 3.4854  | 7 |
| ZNF214   | 17.4639  | 3.7334  | 0      | 0      | 6.4405  | 0       | 14.4736 | 2.8248 | 2.4616 | 0      | 0       | 10.0023 | 7 |
| ZNF329   | 2.482    | 0       | 2.4074 | 0      | 2.771   | 1.7537  | 0       | 1.5433 | 1.751  | 0      | 2.1119  | 0       | 7 |
| ZNF597   |          |         | 0      | 0      | 0       | 0       |         |        |        | 0      | 1.3123  |         | 7 |
| ZNF660   | 3.2005   | 0       | 7.3516 | 0      | 3.1097  | 0       | 0       | 2.3256 | 3.7359 | 0      | 5.4377  | 5.3546  | 7 |
| ZNF667   | 0        |         | 0      | 0      | 17.5866 |         | 17.5626 | 5.6431 | 8.2995 | 0      | 0       | 12.3974 | 7 |
| ZNF702P  | 0        | 2.4731  | 3.3745 | 0      | 4.4316  | 2.711   | 7.7618  | 3.17   | 2.7959 | 0      | 0       | 0       | 7 |

|           |         |        |        |        |        |          |         |        |        |        |        |        |   |
|-----------|---------|--------|--------|--------|--------|----------|---------|--------|--------|--------|--------|--------|---|
| ZSCAN12   |         | 0      | 0      | 0      | 2.1622 | 1.4094   | 0       |        | 1.5866 | 0      |        |        | 7 |
| ABO       | 12.1759 | 3.229  | 0      | 0      | 9.2766 | 0        | 0       | 8.2995 | 6.1454 | 0      | 0      |        | 6 |
| ACAA2     | 0       | 1.5262 | 2.4382 | 2.0172 | 0      | 0        | 0       | 0      | 2.4457 | 1.6916 | 0      | 3.0734 | 6 |
| ACOX2     | 0       |        | 4.5663 | 0      | 0      |          | 10.0859 | 0      | 0      |        | 0      |        | 6 |
| ACSS3     | 0       | 3.527  | 0      | 0      | 0      | 3.346    | 0       | 2.0194 | 2.0866 | 3.6942 | 0      | 3.6573 | 6 |
| ADHFE1    | 3.9769  | 2.8567 | 0      | 0      | 2.9222 | 0        | 0       | 3.0876 | 2.1009 | 0      | 0      | 5.5478 | 6 |
| AMT       | 0       | 3.078  |        | 0      | 0      |          | 1.2875  | 0      | 0      | 5.1651 | 0      |        | 6 |
| BASP1     | 4.8365  | 0      | 0      | 1.7319 | 2.4465 | 0        | 8.0411  | 2.8075 | 0      | 0      | 0      | 2.8478 | 6 |
| BNIP3     | 1.81    | 0      | 4.0181 | 0      | 2.0849 | 1.6144   | 0       | 2.6301 | 0      | 0      | 2.9392 | 0      | 6 |
| C20orf151 |         |        | 0      | 0      | 0      | 112.1344 | 0       |        |        | 0      | 0      |        | 6 |
| C2orf43   | 1.8723  | 2.523  | 0      | 0      | 1.9005 | 0        | 0       | 0      | 1.6643 | 1.6905 | 0      | 4.7652 | 6 |
| CARD11    | 0       | 0      | 5.528  | 0      | 2.2819 | 0        | 0       | 2.4956 | 2.5445 | 0      | 5.9666 |        | 6 |
| CBLC      |         |        | 0      | 0      | 0      | 0        | 0       |        |        |        | 0      |        | 6 |
| CBR1      | 3.0295  | 2.7788 | 0      | 0      | 1.7875 | 0        | 2.4402  | 0      | 2.8963 | 0      | 0      | 3.5091 | 6 |
| CCDC106   | 0       | 0      |        | 0      |        | 1.5429   | 0       |        | 0      | 0      |        | 1.4992 | 6 |
| CHFR      | 0       | 0      |        | 0      | 2.5724 | 0        | 3.3795  | 0      | 2.1457 | 0      |        | 1.8213 | 6 |
| CHST10    | 2.5499  | 0      | 0      | 0      | 3.4671 | 1.7699   | 0       | 3.6609 | 3.3833 | 0      | 2.6009 | 0      | 6 |

Supplementary Table 7

| Gene     | BLCA     | BRCA    | COAD     | GBM    | HNSC      | KIRC    | LAML    | LUAD     | LUSC     | OV      | READ     | UCEC    | SumNonZero |
|----------|----------|---------|----------|--------|-----------|---------|---------|----------|----------|---------|----------|---------|------------|
| MAGEA4   | 339.2904 | 28.2628 | 16.1365  | 0      | 53.7881   | 0       | 0       | 293.1677 | 194.8752 | 58.2436 | 31.0221  | 72.6299 | 9          |
| BATF     | 8.6382   | 2.8322  | 3.4132   | 3.0101 | 0         | 2.5442  | 0       | 2.0325   | 0        | 2.2871  | 0        | 0       | 8          |
| DAPP1    | 0        | 2.8294  | 3.9399   | 0      | 0         | 1.9963  | 0       | 2.4607   | 0        | 0       | 4.4443   | 2.909   | 8          |
| FOXRED2  | 1.6466   | 1.4717  | 1.4284   | 0      | 2.4758    | 0       | 0       | 1.8947   | 1.6972   | 1.461   | 0        | 1.4329  | 8          |
| ACY1     | 2.5349   | 0       | 1.832    | 0      | 1.6599    | 0       | 0       | 1.6597   | 1.5257   | 1.5605  | 1.8405   | 0       | 7          |
| BST2     | 0        | 0       | 5.3227   | 0      | 5.095     | 3.31    | 0       | 2.3388   | 0        | 0       | 4.5068   | 7.028   | 7          |
| CALML4   | 0        | 1.5116  | 0        | 0      | 1.4362    | 1.4174  | 0       | 1.801    | 1.7793   | 1.5809  | 0        | 1.7114  | 7          |
| MAGEA10  | 111.8364 | 13.9385 | 0        | 0      | 11.8939   | 0       | 0       | 33.9489  | 600.8541 | 0       | 2.5734   | 8.891   | 7          |
| C2       | 0        | 0       | 0        | 0      | 0         | 2.0901  | 20.0038 | 0        | 0        | 2.8805  | 0        | 3.0957  | 6          |
| CALML5   | 91.2396  | 94.581  | 0        | 0      | 8.8473    | 0       | 0       | 24.2645  | 34.3671  | 16.6145 | 0        | 0       | 6          |
| CES3     | 0        | 11.6694 | 0        | 0      | 3.4693    | 3.7614  | 0       | 2.892    | 4.8953   | 0       | 0        | 0       | 6          |
| GPR171   | 0        | 5.168   | 0        | 0      | 2.1218    | 2.3332  | 0       | 3.5354   | 2.1077   | 3.3475  | 0        | 0       | 6          |
| HAL      | 4.2208   | 0       | 0        | 0      | 0         | 0       | 0       | 14.2004  | 8.3382   | 19.8681 | 4.1314   | 6.9815  | 6          |
| IL20RB   | 13.5905  | 3.0877  | 2.5678   | 0      | 0         | 31.9998 | 0       | 14.3686  | 0        | 0       | 0        | 1.9477  | 6          |
| NAIF1    | 0        | 1.3336  | 0        | 0      | 1.3123    | 0       | 1.4276  | 1.3548   | 1.2371   | 1.1376  | 0        | 0       | 6          |
| OAS2     | 0        | 0       | 0        | 0      | 0         | 1.4824  | 0       | 1.8292   | 0        | 2.5717  | 0        | 3.5823  | 6          |
| PADI3    | 0        | 23.4719 | 6.0035   | 0      | 5.344     | 0       | 0       | 0        | 0        | 4.9973  | 4.8961   | 5.3786  | 6          |
| PNLDC1   | 13.409   | 39.8992 | 0        | 0      | 38.8756   | 0       | 0       | 11.3196  | 58.4574  | 6.5522  | 0        | 0       | 6          |
| C16orf54 | 0        | 3.741   | 2.9809   | 0      | 0         | 2.1097  | 0       | 0        | 0        | 0       | 7.5785   | 3.5741  | 5          |
| C6orf15  | 0        | 16.5124 | 14.1669  | 0      | 0         | 0       | 0       | 0        | 0        | 31.2748 | 10.0249  | 40.27   | 5          |
| CD3D     | 0        | 4.8019  | 1.6006   | 0      | 0         | 3.12    | 0       | 0        | 0        | 4.429   | 0        | 4.9116  | 5          |
| CEL      | 7.7653   | 5.8187  | 26.2127  | 0      | 0         | 0       | 0       | 4.2113   | 0        | 0       | 0        | 3.4829  | 5          |
| CFB      | 0        | 0       | 1.8368   | 0      | 0         | 2.3713  | 0       | 0        | 0        | 3.5866  | 0        | 3.8466  | 5          |
| CNTD1    | 0        | 0       | 2.37     | 0      | 2.8929    | 0       | 0       | 1.7222   | 1.5625   | 1.7657  | 0        | 0       | 5          |
| ELF5     | 0        | 29.7985 | 332.7208 | 0      | 12.1468   | 0       | 0       | 0        | 0        | 35.4709 | 247.9404 | 0       | 5          |
| EPHX4    | 0        | 5.7735  | 0        | 0      | 0         | 0       | 0       | 3.383    | 3.0819   | 2.3007  | 2.3979   | 0       | 5          |
| F2       | 10.1353  | 0       | 12.8001  | 0      | 13.1122   | 0       | 0       | 68.4565  | 11.3931  | 0       | 0        | 0       | 5          |
| FKBP10   | 0        | 0       | 2.3885   | 0      | 0         | 2.3362  | 0       | 3.2861   | 2.2074   | 0       | 3.1016   | 0       | 5          |
| GBP4     | 0        | 2.1297  | 0        | 0      | 2.5704    | 0       | 0       | 2.1247   | 0        | 0       | 2.2759   | 0       | 5          |
| GPX2     | 368.7755 | 0       | 2.1843   | 0      | 0         | 0       | 0       | 101.1866 | 50.8495  | 0       | 0        | 27.7266 | 5          |
| IL2RB    | 3.8483   | 4.9557  | 0        | 0      | 0         | 2.4404  | 0       | 2.5261   | 0        | 0       | 0        | 2.7921  | 5          |
| LAT      | 2.0912   | 0       | 1.9168   | 0      | 0         | 0       | 0       | 0        | 0        | 0       | 1.5514   | 2.3848  | 5          |
| MAGEC2   | 0        | 95.0366 | 0        | 0      | 1570.1837 | 0       | 0       | 0        | 0        | 20.0509 | 6.2029   | 440.696 | 5          |
| MSLN     | 0        | 23.3751 | 4.1611   | 0      | 31.1843   | 0       | 0       | 23.6879  | 6.6195   | 0       | 0        | 0       | 5          |
| PAGE2    | 10.6896  | 0       | 0        | 0      | 13.6748   | 0       | 0       | 10.6141  | 89.5748  | 0       | 0        | 11.3319 | 5          |
| PER3     | 2.6034   | 0       | 0        | 0      | 0         | 0       | 0       | 2.4344   | 2.7386   | 1.7568  | 0        | 2.3907  | 5          |
| S100P    | 0        | 18.8587 | 0        | 0      | 2.5991    | 0       | 0       | 0        | 7.8271   | 2.5586  | 0        | 4.0842  | 5          |
| SYCP2    | 3.0637   | 0       | 0        | 0      | 8.2886    | 0       | 0       | 8.9836   | 5.2581   | 0       | 0        | 0       | 5          |
| TBC1D10C | 0        | 3.5335  | 0        | 1.9652 | 1.8357    | 0       | 0       | 0        | 0        | 2.5131  | 0        | 3.49    | 5          |
| TDRD1    | 0        | 0       | 0        | 0      | 226.8747  | 0       | 0       | 94.6054  | 14.2354  | 2.5512  | 295.9944 | 0       | 5          |
| ZNF556   | 0        | 0       | 14.4978  | 0      | 0         | 0       | 95.5104 | 38.9975  | 182.123  | 0       | 134.753  | 0       | 5          |

|          |         |          |        |        |         |         |         |          |           |         |        |          |   |
|----------|---------|----------|--------|--------|---------|---------|---------|----------|-----------|---------|--------|----------|---|
| ABCC2    | 0       | 0        | 7.1562 | 0      | 0       | 4.6148  | 0       | 7.0383   | 3.4819    | 0       | 0      | 0        | 4 |
| ACSL5    | 2.1436  | 0        | 1.5707 | 0      | 0       | 0       | 0       | 1.7611   | 0         | 0       | 1.4974 | 0        | 4 |
| BIN2     | 0       | 3.3275   | 0      | 1.7456 | 0       | 1.9978  | 0       | 0        | 0         | 0       | 0      | 3.0252   | 4 |
| BRDT     | 5.4434  | 0        | 0      | 0      | 0       | 0       | 0       | 11.0146  | 1496.7892 | 0       | 0      | 0        | 4 |
| C11orf16 | 0       | 0        | 0      | 0      | 34.208  | 0       | 0       | 5.5419   | 12.7614   | 10.9643 | 0      | 0        | 4 |
| C11orf9  | 0       | 0        | 3.2685 | 0      | 0       | 0       | 0       | 1.9969   | 0         | 3.5397  | 2.1006 | 0        | 4 |
| C1orf64  | 0       | 250.3954 | 0      | 0      | 0       | 0       | 0       | 19.3649  | 0         | 2.5766  | 0      | 173.4098 | 4 |
| CCR7     | 0       | 4.1064   | 0      | 0      | 0       | 2.1107  | 0       | 0        | 0         | 1.8598  | 0      | 2.8817   | 4 |
| CP       | 36.7606 | 18.6177  | 0      | 0      | 0       | 0       | 0       | 7.2536   | 0         | 12.6125 | 0      | 0        | 4 |
| CSTA     | 0       | 0        | 0      | 0      | 0       | 1.7225  | 0       | 0        | 0         | 2.9429  | 0      | 1.9527   | 4 |
| CTSE     | 0       | 0        | 0      | 0      | 8.8218  | 11.3723 | 0       | 0        | 0         | 7.2579  | 0      | 9.0322   | 4 |
| DENND2D  | 0       | 1.9745   | 0      | 1.4693 | 0       | 1.4254  | 0       | 1.3892   | 0         | 0       | 0      | 0        | 4 |
| DOK2     | 0       | 2.247    | 0      | 0      | 0       | 1.7935  | 0       | 0        | 0         | 2.4488  | 0      | 2.773    | 4 |
| EPS8L3   | 0       | 0        | 0      | 0      | 0       | 69.3278 | 0       | 150.466  | 28.8184   | 0       | 0      | 59.4416  | 4 |
| FUT6     | 0       | 10.1949  | 2.407  | 0      | 0       | 0       | 0       | 4.3842   | 0         | 0       | 0      | 4.4478   | 4 |
| FXVD4    | 0       | 3.9111   | 0      | 0      | 0       | 0       | 0       | 20.9326  | 0         | 46.7958 | 0      | 9.1557   | 4 |
| GPT      | 3.835   | 0        | 0      | 0      | 0       | 0       | 59.9112 | 4.2995   | 0         | 0       | 0      | 3.4581   | 4 |
| IFITM1   | 0       | 0        | 0      | 0      | 1.8534  | 1.6718  | 0       | 0        | 0         | 0       | 2.063  | 2.686    | 4 |
| INSL6    | 0       | 3.6669   | 0      | 0      | 3.3451  | 0       | 0       | 11.3403  | 0         | 9.0925  | 0      | 0        | 4 |
| KAZALD1  | 0       | 0        | 0      | 3.1457 | 2.0584  | 0       | 0       | 0        | 0         | 5.4544  | 0      | 4.4643   | 4 |
| KCNJ11   | 0       | 0        | 0      | 0      | 0       | 1.6247  | 0       | 2.7419   | 2.1873    | 0       | 0      | 1.5588   | 4 |
| KRT80    | 0       | 2.2625   | 0      | 0      | 0       | 2.4138  | 0       | 2.0644   | 0         | 2.7437  | 0      | 0        | 4 |
| LGALS4   | 0       | 0        | 0      | 0      | 8.2793  | 9.2205  | 0       | 120.2012 | 4.7111    | 0       | 0      | 0        | 4 |
| LPIN2    | 0       | 1.472    | 0      | 0      | 0       | 0       | 0       | 2.1658   | 0         | 0       | 1.7583 | 1.6878   | 4 |
| MIA      | 0       | 0        | 0      | 0      | 0       | 0       | 0       | 15.7445  | 7.632     | 2.3467  | 0      | 6.3813   | 4 |
| MKRN3    | 0       | 0        | 4.4771 | 0      | 0       | 0       | 0       | 20.7977  | 0         | 0       | 8.2138 | 13.4692  | 4 |
| NCF2     | 0       | 0        | 1.8975 | 0      | 0       | 1.7056  | 0       | 0        | 0         | 2.262   | 0      | 2.4617   | 4 |
| NCF4     | 0       | 1.6266   | 0      | 1.8304 | 0       | 0       | 0       | 0        | 0         | 1.633   | 0      | 1.7371   | 4 |
| NLRP2    | 0       | 0        | 0      | 0      | 11.0737 | 0       | 0       | 9.3935   | 6.5057    | 76.981  | 0      | 0        | 4 |
| PPP1R14D | 0       | 0        | 0      | 0      | 0       | 5.4107  | 0       | 16.275   | 24.9266   | 14.3425 | 0      | 0        | 4 |
| PTPN22   | 0       | 0        | 0      | 2.1103 | 0       | 1.8762  | 0       | 0        | 0         | 2       | 0      | 2.3324   | 4 |
| PTPN7    | 0       | 3.6539   | 0      | 0      | 0       | 2.9274  | 0       | 0        | 0         | 2.7115  | 0      | 2.5398   | 4 |
| RAPSN    | 0       | 6.9619   | 0      | 0      | 0       | 0       | 0       | 0        | 2.9307    | 10.1582 | 0      | 4.0258   | 4 |
| RDH5     | 0       | 0        | 0      | 1.7611 | 0       | 2.3545  | 0       | 2.1848   | 1.3237    | 0       | 0      | 0        | 4 |
| RLBP1    | 0       | 0        | 0      | 3.9062 | 8.5163  | 0       | 0       | 3.9653   | 6.8596    | 0       | 0      | 0        | 4 |
| S100A5   | 0       | 0        | 0      | 0      | 0       | 0       | 0       | 22.188   | 8.2585    | 2.5264  | 0      | 8.2772   | 4 |
| SERPINF1 | 0       | 0        | 0      | 0      | 2.4862  | 3.4746  | 0       | 2.3506   | 2.0499    | 0       | 0      | 0        | 4 |
| SLC28A2  | 0       | 0        | 8.356  | 0      | 0       | 0       | 0       | 42.1183  | 0         | 13.7516 | 0      | 3.2214   | 4 |
| SNX20    | 0       | 2.0826   | 2.68   | 0      | 0       | 0       | 0       | 0        | 0         | 2.3362  | 0      | 2.5418   | 4 |
| TFF1     | 0       | 104.9901 | 5.3629 | 0      | 0       | 0       | 0       | 0        | 0         | 0       | 5.704  | 31.1738  | 4 |
| TMEM45B  | 4.1201  | 0        | 1.451  | 0      | 0       | 0       | 0       | 2.0149   | 3.5822    | 0       | 0      | 0        | 4 |
| TRAF1    | 3.1898  | 0        | 1.3836 | 0      | 0       | 0       | 0       | 0        | 0         | 1.4272  | 0      | 1.832    | 4 |



|          |   |         |        |        |         |          |        |         |          |         |        |        |   |
|----------|---|---------|--------|--------|---------|----------|--------|---------|----------|---------|--------|--------|---|
| UGT1A10  | 0 | 0       | 0      | 0      | 57.6587 | 142.3124 | 0      | 42.3302 | 198.1796 | 0       | 0      | 0      | 4 |
| AGMAT    | 0 | 0       | 0      | 0      | 1.5989  | 0        | 2.0819 | 0       | 0        | 1.5507  | 0      | 0      | 3 |
| ALPPL2   | 0 | 0       | 14.434 | 0      | 0       | 0        | 0      | 20.2424 | 0        | 15.0429 | 0      | 0      | 3 |
| ARL14    | 0 | 12.0545 | 0      | 0      | 0       | 0        | 0      | 10.7269 | 8.0143   | 0       | 0      | 0      | 3 |
| BEST3    | 0 | 18.9104 | 0      | 2.5133 | 0       | 0        | 0      | 0       | 0        | 0       | 0      | 9.3527 | 3 |
| C12orf40 | 0 | 6.0689  | 0      | 0      | 4.1554  | 0        | 0      | 0       | 6.0725   | 0       | 0      | 0      | 3 |
| CAPN9    | 0 | 0       | 8.9107 | 0      | 0       | 0        | 0      | 0       | 0        | 3.3255  | 4.5585 | 0      | 3 |
| CARD14   | 0 | 0       | 2.2606 | 0      | 0       | 4.368    | 0      | 4.5761  | 0        | 0       | 0      | 0      | 3 |
| CASP8    | 0 | 0       | 0      | 0      | 0       | 1.5513   | 0      | 1.4092  | 0        | 0       | 0      | 0      | 3 |
| CCDC109B | 0 | 1.5034  | 0      | 1.8846 | 0       | 1.5709   | 0      | 0       | 0        | 0       | 0      | 0      | 3 |
| CCL5     | 0 | 4.0381  | 0      | 0      | 0       | 0        | 0      | 0       | 0        | 4.0877  | 0      | 2.3578 | 3 |
| CCND1    | 0 | 0       | 0      | 3.0421 | 0       | 0        | 2.6178 | 0       | 0        | 0       | 0      | 1.8962 | 3 |
| CD5      | 0 | 0       | 0      | 0      | 0       | 2.7754   | 0      | 0       | 0        | 2.1563  | 0      | 2.6085 | 3 |
| CD6      | 0 | 0       | 0      | 1.8126 | 0       | 2.6068   | 0      | 0       | 0        | 0       | 0      | 3.1256 | 3 |
| CDSN     | 0 | 0       | 0      | 0      | 0       | 2.2283   | 0      | 0       | 0        | 2.4806  | 2.5858 | 0      | 3 |
| CHRNA9   | 0 | 29.1054 | 0      | 0      | 0       | 0        | 0      | 118.834 | 16.6261  | 0       | 0      | 0      | 3 |
| CHST6    | 0 | 2.6204  | 0      | 0      | 0       | 0        | 0      | 2.5236  | 2.192    | 0       | 0      | 0      | 3 |

# Supplementary Table 8

| Stem cell gene set                             | BLCA    | BRCA    | COAD    | GBM     | HNSC    | KIRC    | LAML    | LUAD    | LUSC    | OV      | READ    | UCEC    | Fisher<br>Combo | ChiSquare<br>Pvalue | ChiSquare<br>Pvalue-FDR |
|------------------------------------------------|---------|---------|---------|---------|---------|---------|---------|---------|---------|---------|---------|---------|-----------------|---------------------|-------------------------|
| Boyer_Cobound_Oct4_Sox2_Nanog_unexpressed      | 0.00630 | 0.00009 | 0.00020 |         | 0.00000 |         | 0.00670 | 0.00040 | 0.00000 |         | 0.05459 |         | 45.494          | 0                   | 0                       |
| Ivanova_Tc1_shRNA                              | 0.00554 | 0.00000 | 0.00226 |         | 0.00363 |         | 0.00004 | 0.00083 | 0.00836 | 0.00030 | 0.03540 | 0.00000 | 75.3577         | 0                   | 0                       |
| Ivanova_Up_Pattern3                            | 0.00066 | 0.00001 |         | 0.00227 | 0.00683 | 0.00006 | 0.00073 | 0.00001 | 0.04300 | 0.00473 |         | 0.00006 | 60.4623         | 0                   | 0                       |
| Kim_Cell200_PrC_Human                          | 0.00000 | 0.00007 | 0.00007 | 0.00267 | 0.00000 | 0.03080 | 0.06200 | 0.00000 | 0.00000 |         |         | 0.00001 | 38.853          | 0                   | 0                       |
| Kim_Cell200_PrC_Module                         | 0.00001 | 0.00006 | 0.00002 | 0.00229 | 0.00000 | 0.02790 | 0.05530 | 0.00000 | 0.00000 |         | 0.04846 | 0.00004 | 32.398          | 0                   | 0                       |
| Kim_Cell200_Smad                               | 0.02900 | 0.00029 | 0.00001 |         | 0.00048 |         | 0.06882 | 0.00007 | 0.00002 | 0.00457 | 0.00328 | 0.04374 | 4.493           | 0                   | 0                       |
| Kim_Cell200_Zfp28                              | 0.00033 | 0.00061 | 0.00000 |         | 0.00587 |         | 0.00070 | 0.00008 | 0.00737 |         | 0.02500 | 0.00003 | 43.52           | 0                   | 0                       |
| Loh_Nanogbind_diffexp                          | 0.02759 | 0.00470 | 0.00000 | 0.00284 | 0.00530 |         | 0.00060 | 0.00060 |         | 0.04908 | 0.00053 |         | 34.564          | 0                   | 0                       |
| Morris_HFSC_dChipUp                            |         | 0.00003 | 0.00450 | 0.00048 |         | 0.00250 | 0.00092 | 0.00762 |         |         | 0.02379 | 0.00000 | 27.566          | 4.44E-06            | 2.08E-15                |
| Ivanova_Down_Nanog_shRNA_TC                    | 0.00976 | 0.00940 | 0.00044 |         | 0.00027 | 0.03744 | 0.00004 | 0.00945 | 0.02085 |         | 0.00045 | 0.03490 | 20.9804         | 6.44E-15            | 2.73E-14                |
| Kim_Zfp28_targets                              | 0.00839 | 0.00649 | 0.00001 |         | 0.00256 |         | 0.00022 | 0.00054 | 0.03351 |         | 0.02287 | 0.00725 | 6.5584          | 3.96E-14            | 5.34E-13                |
| Ivanova_Up_Pattern2                            | 0.03829 | 0.00007 | 0.00004 | 0.00298 | 0.03923 |         | 0.04000 | 0.04235 | 0.04703 | 0.04089 | 0.00943 | 0.00774 | 3.3672          | 4.49E-13            | 5.58E-13                |
| LauAllPrognosisGenes                           | 0.00009 | 0.00234 | 0.00009 |         | 0.00860 |         | 0.02623 | 0.00777 | 0.02645 | 0.00721 | 0.00286 |         | 3.485           | 4.89E-13            | 5.58E-13                |
| Ivanova_Down_Dppa4_shRNA                       | 0.00742 | 0.00001 | 0.03004 |         | 0.00048 |         |         | 0.00200 | 0.02749 | 0.00281 | 0.02830 | 0.00338 | 6.786           | 2.04E-12            | 7.00E-12                |
| Mathur_Oct4KO_Down                             | 0.04506 | 0.00005 | 0.00073 |         |         |         | 0.02981 | 0.00001 | 0.02491 | 0.02509 | 0.00410 | 0.04838 | 5.9066          | 2.90E-12            | 9.57E-12                |
| Garber_MolecularClassificationSignature        |         | 0.00001 | 0.00001 |         | 0.00004 | 0.03082 |         | 0.03649 |         | 0.09580 | 0.03935 |         | 98.5877         | 5.23E-11            | 6.60E-10                |
| Mikkelsen_Up_partial-iPS-ES                    | 0.00000 | 0.02900 | 0.08242 |         | 0.00285 | 0.02820 | 0.00003 |         | 0.08354 |         |         | 0.03809 | 97.9244         | 6.78E-11            | 2.08E-10                |
| Morris_HFSC_GenespringUp                       |         | 0.00001 | 0.03303 |         | 0.00427 |         |         | 0.00005 | 0.00565 |         | 0.02504 | 0.00008 | 97.7962         | 7.95E-11            | 2.20E-10                |
| Morris_HFSC_dChip_Down                         | 0.00031 | 0.00084 | 0.00367 |         |         |         | 0.00541 | 0.05549 | 0.00864 |         | 0.00006 | 0.04489 | 97.3689         | 8.41E-11            | 2.45E-10                |
| BreastVsBreast4                                | 0.00726 | 0.00389 | 0.00765 | 0.03685 | 0.00085 |         | 0.00041 | 0.02570 | 0.06699 |         | 0.00229 | 0.00229 | 92.4744         | 5.59E-10            | 4.64E-09                |
| Mathur_Nanog4KO_Down                           |         | 0.00680 | 0.00008 |         |         |         |         | 0.00001 | 0.00988 | 0.00024 |         | 0.00702 | 87.25           | 4.46E-09            | 2.49E-09                |
| Morris_HFSC_combined_Up                        |         | 0.00002 | 0.05525 |         | 0.05354 |         |         | 0.00306 | 0.00720 |         | 0.02740 | 0.00041 | 85.7677         | 7.49E-09            | 7.96E-08                |
| Karsten_Up_Differentiated                      | 0.00020 | 0.00270 |         |         | 0.00826 |         |         | 0.02977 | 0.03373 | 0.00321 |         | 0.00002 | 85.72           | 9.24E-09            | 2.37E-08                |
| Mathur_Nanogbound-bound                        | 0.02855 |         | 0.00440 | 0.02608 | 0.00070 |         | 0.03630 | 0.00009 | 0.04376 | 0.00678 |         |         | 82.7283         | 2.22E-08            | 5.07E-08                |
| Sato_HSC_enriched_Differentiated_absent_SOURCE | 0.05728 | 0.00270 |         |         | 0.00025 |         | 0.00257 | 0.00504 | 0.00084 |         |         | 0.03500 | 80.35           | 5.79E-08            | 2.57E-07                |
| Morris_HFSC_combined_Down                      | 0.03230 | 0.00849 | 0.00588 |         |         | 0.03963 | 0.03632 |         |         | 0.00690 | 0.00081 | 0.05847 | 80.094          | 6.04E-08            | 2.80E-07                |
| Roepman_LungCancerPrognosisSignature           |         | 0.07405 |         |         | 0.04334 | 0.02224 | 0.00223 |         | 0.02631 | 0.02900 | 0.00354 | 0.00020 | 78.7939         | 9.46E-08            | 9.33E-07                |
| Boyer_ExpressedBound_Oct4_Cell2005             |         | 0.00246 | 0.00745 |         | 0.00040 |         | 0.00304 | 0.00551 |         |         | 0.02937 | 0.00876 | 78.2658         | 4.67E-07            | 2.27E-07                |
| Ivanova_OverExpressionRegulators               | 0.00633 | 0.05396 | 0.00475 |         | 0.00344 |         | 0.00056 | 0.00751 |         | 0.02887 |         |         | 74.922          | 3.84E-07            | 7.42E-07                |
| Fortune1_NPC_3studies                          |         | 0.00007 |         | 0.08495 | 0.03027 | 0.03820 |         |         | 0.00492 | 0.06755 |         | 0.00544 | 72.0375         | 6.99E-07            | 2.03E-06                |
| Chen_Sox2_geneassociations                     |         | 0.03858 |         | 0.02330 | 0.04090 |         |         | 0.00270 |         | 0.00002 | 0.02426 | 0.03983 | 69.8554         | 2.30E-06            | 4.09E-06                |
| Kosinski_Up_ColonCrypts                        |         | 0.02828 | 0.00076 |         | 0.07435 |         | 0.04737 | 0.04741 |         | 0.00056 |         | 0.00256 | 68.723          | 3.42E-06            | 5.97E-06                |
| Lu_LungCancerSurvivalSignature                 | 0.00741 | 0.00034 | 0.05405 |         | 0.02008 |         |         | 0.00949 | 0.00266 |         |         |         | 66.2648         | 7.93E-06            | 3.57E-05                |
| Hu_Her2Genes_SuppTable                         | 0.00082 |         | 0.03780 |         |         | 0.03586 |         | 0.06392 |         | 0.00600 | 0.03638 | 0.09499 | 65.583          | 5.38E-05            | 9.38E-05                |
| Kim_Cell200_Core_Human                         |         |         | 0.00029 |         | 0.00780 |         |         | 0.00048 | 0.04700 | 0.09500 | 0.03770 |         | 64.8224         | 2.92E-05            | 2.30E-05                |
| Morris_HFSC_Genespring_Down                    | 0.04897 | 0.07959 | 0.00373 |         |         | 0.02304 |         |         |         | 0.07400 | 0.00046 | 0.02890 | 64.466          | 6.22E-05            | 2.63E-05                |
| Komor_UpMegakaryopoieticDiff                   |         | 0.00807 |         |         |         |         | 0.09240 | 0.00792 |         | 0.06073 | 0.00573 | 0.00047 | 64.0924         | 6.52E-05            | 2.63E-05                |
| Schebesta_Pax5_activated                       | 0.02966 | 0.00269 | 0.00044 |         | 0.00406 |         |         | 0.02304 |         |         | 0.00606 |         | 63.7069         | 8.80E-05            | 2.94E-05                |
| Kim_Cell200_Core_Module                        |         |         | 0.00081 |         | 0.00450 |         |         | 0.00026 | 0.02509 | 0.00068 |         |         | 63.532          | 9.93E-05            | 3.06E-05                |
| VeneziaHSC_Qsig                                |         | 0.00628 | 0.00443 |         |         | 0.00257 | 0.00022 |         | 0.02026 | 0.04338 |         |         | 63.295          | 2.60E-05            | 3.26E-05                |
| Ivanova_Down_Oct4_shRNA_TC                     |         | 0.00534 |         | 0.00701 | 0.04928 |         | 0.00274 | 0.00380 |         |         |         | 0.03693 | 6.56            | 3.90E-05            | 5.68E-05                |
| Ivanova_Up_Oct4_shRNA_TC                       |         | 0.00534 |         | 0.00701 | 0.04928 |         | 0.00274 | 0.00380 |         |         |         | 0.03693 | 6.56            | 3.90E-05            | 5.68E-05                |
| Chitale_EGFRsignature                          |         | 0.00650 |         |         |         | 0.00995 | 0.00634 | 0.06262 | 0.00827 | 0.04406 |         |         | 6.583           | 4.38E-05            | 6.28E-05                |
| Ben-Porath_Core9genes                          | 0.00067 | 0.00443 |         |         | 0.02682 |         |         | 0.00406 | 0.03904 |         |         | 0.00398 | 59.449          | 7.65E-05            | 0.000048                |
| Bracken_Polycomb-depleted_Up                   |         | 0.00238 | 0.04824 |         | 0.02088 |         | 0.03270 | 0.00200 | 0.00774 |         |         |         | 56.796          | 0.000266            | 0.0002835               |
| Ivanova_Down_Pattern2                          | 0.04295 | 0.00885 | 0.03629 |         | 0.00488 |         |         | 0.00094 |         |         | 0.03875 |         | 55.56           | 0.00026288          | 0.00033908              |
| p9nullvMYC_UNI_DN                              | 0.00939 | 0.03903 |         |         | 0.00540 |         |         | 0.07858 | 0.00289 |         | 0.03830 |         | 52.5883         | 0.00065532          | 0.0008332               |
| Kim_birA_targets                               |         | 0.00002 |         |         |         |         |         | 0.00020 | 0.00255 |         |         |         | 5.3287          | 0.00095632          | 0.00988                 |
| Chen_Smad_geneassociations                     |         |         | 0.00046 |         | 0.03300 |         |         | 0.04960 | 0.08073 | 0.00361 |         |         | 49.8582         | 0.00476             | 0.008204                |
| p9nullvMYC_UNI_TOT                             |         | 0.02238 |         |         | 0.00827 |         |         | 0.02395 | 0.00076 |         |         | 0.05930 | 49.887          | 0.00493             | 0.008204                |
| Komor_UpErythropoieticDiff                     |         |         |         |         | 0.00731 | 0.03440 | 0.02758 | 0.00386 | 0.04250 |         |         | 0.04368 | 49.3328         | 0.0072              | 0.0020688               |

|                             |         |         |         |         |         |         |         |         |         |         |           |           |         |
|-----------------------------|---------|---------|---------|---------|---------|---------|---------|---------|---------|---------|-----------|-----------|---------|
| Ben-Porath_ES-ExprSet       | 0.03400 | 0.00688 |         |         |         | 0.00352 | 0.02059 | 0.02075 |         | 48.62   | 0.0024    | 0.0028224 |         |
| NKX22_038_Array2            | 0.03448 | 0.03867 | 0.03934 | 0.00992 |         | 0.00359 | 0.02236 |         |         | 47.7989 | 0.0026729 | 0.0030894 |         |
| Fortunel_ESC_3studies       |         | 0.00489 |         | 0.02627 |         | 0.00273 | 0.02099 |         | 0.03775 | 46.4809 | 0.0038735 | 0.004498  |         |
| BeerAdenoPrognosisSignature | 0.02823 | 0.00847 | 0.00666 |         |         | 0.07400 |         |         | 0.03062 | 44.3668 | 0.006945  | 0.0077898 |         |
| Mikkelsen_Down_iPS-ES       |         |         | 0.03969 | 0.00535 | 0.09700 |         | 0.00349 |         |         | 0.04071 | 43.4947   | 0.0087292 | 0.00973 |

## Supplementary Table 9

|      | DM value clustering     |                         |      | Beta value clustering   |                         | Jaccard coefficient |
|------|-------------------------|-------------------------|------|-------------------------|-------------------------|---------------------|
|      | Intra-cluster consensus | Inter-Cluster consensus |      | Intra-cluster consensus | Inter-Cluster consensus |                     |
| BLCA | 80%                     | 8%                      | BLCA | 74%                     | 11%                     | 0.34                |
| BRCA | 89%                     | 4%                      | BRCA | 84%                     | 6%                      | 0.41                |
| COAD | 96%                     | 3%                      | COAD | 88%                     | 6%                      | 0.67                |
| GBM  | 89%                     | 5%                      | GBM  | 84%                     | 7%                      | 0.44                |
| HNSC | 86%                     | 5%                      | HNSC | 77%                     | 8%                      | 0.33                |
| KIRC | 91%                     | 4%                      | KIRC | 87%                     | 5%                      | 0.29                |
| LAML | 89%                     | 8%                      | LAML | 74%                     | 19%                     | 0.30                |
| LUAD | 77%                     | 8%                      | LUAD | 80%                     | 8%                      | 0.24                |
| LUSC | 75%                     | 9%                      | LUSC | 69%                     | 10%                     | 0.30                |
| OV   | 93%                     | 4%                      | OV   | 93%                     | 4%                      | 0.31                |
| READ | 65%                     | 12%                     | READ | 62%                     | 9%                      | 0.20                |
| UCEC | 91%                     | 3%                      | UCEC | 87%                     | 6%                      | 0.37                |

All green values correspond to clusterings where the DM value clustering is better than clustering the beta-values.

This means higher consensus within a each cluster (=intra cluster consensus) and lower consensus for samples clustered in different clusters (=inter cluster consensus)

For both clusterings exactly the same number of clusters where compared for each cancer

The jaccard coefficient is the comparison fo the DM-value clustering and the beta value clustering.

## Supplementary Table 10

### Colon cancer (COAD)

| DM value clustering            |                  |                      |                       | Beta value clustering          |                  |                      |                       |
|--------------------------------|------------------|----------------------|-----------------------|--------------------------------|------------------|----------------------|-----------------------|
| CIMP vs. BRAF                  | non-CIMP-cluster | BRAF mutation absent | BRAF mutation Present | CIMP vs. BRAF                  | non-CIMP-cluster | BRAF mutation absent | BRAF mutation Present |
|                                | CIMP-Cluster     | 126                  | 0                     |                                | CIMP-Cluster     | 132                  | 5                     |
| Pvalue                         |                  | 28                   | 7                     | Pvalue                         |                  | 22                   | 2                     |
|                                |                  | 0.00001              |                       |                                |                  | 0.2115               |                       |
| CIMP-cluster vs. CIMP-High     | non-CIMP-cluster | Not CIMP-High        | CIMP-High             | CIMP-cluster vs. CIMP-High     | non-CIMP-cluster | Not CIMP-High        | CIMP-High             |
|                                | CIMP-Cluster     | 123                  | 3                     |                                | CIMP-Cluster     | 126                  | 11                    |
| Pvalue                         |                  | 6                    | 29                    | Pvalue                         |                  | 3                    | 21                    |
|                                |                  | 5.83E-07             |                       |                                |                  | 8.85E-07             |                       |
| CIMP-cluster vs. MLH1silencing | non-CIMP-cluster | no MLH1-silencing    | MLH1-silencing        | CIMP-cluster vs. MLH1silencing | non-CIMP-cluster | no MLH1-silencing    | MLH1-silencing        |
|                                | CIMP-Cluster     | 124                  | 2                     |                                | CIMP-Cluster     | 130                  | 7                     |
| Pvalue                         |                  | 10                   | 25                    | Pvalue                         |                  | 4                    | 20                    |
|                                |                  | 8.65E-06             |                       |                                |                  | 2.91E-06             |                       |

### Acute Myeloid Leukemia (LAML)

| DM value clustering |                  |                      |                       | Beta value clustering |                  |                      |                       |
|---------------------|------------------|----------------------|-----------------------|-----------------------|------------------|----------------------|-----------------------|
| CIMP vs. IDHx       | non-CIMP-cluster | IDHx mutation absent | IDHx mutation present | CIMP vs. IDHx         | non-CIMP-cluster | IDHx mutation absent | IDHx mutation present |
|                     | CIMP-Cluster     | 136                  | 10                    |                       | CIMP-Cluster     | 136                  | 17                    |
| Pvalue              |                  | 19                   | 26                    | Pvalue                |                  | 19                   | 19                    |
|                     |                  | 7.54E-06             |                       |                       |                  | 3.15E-06             |                       |

### Glioblastoma multiforme (GBM)

| DM value clustering |                  |          |      | Beta value clustering |                  |          |      |
|---------------------|------------------|----------|------|-----------------------|------------------|----------|------|
| Pvalue              | non-CIMP-cluster | Not CIMP | CIMP | Pvalue                | non-CIMP-cluster | Not CIMP | CIMP |
|                     | CIMP-Cluster     | 207      | 5    |                       | CIMP-Cluster     | 207      | 5    |
|                     |                  | 0        | 18   |                       |                  | 0        | 18   |
|                     |                  | 8.42E-07 |      |                       |                  | 8.42E-07 |      |

## Supplementary Table 11

### Colon cancer (COAD)

| DM value clustering            |                  |                      |                       | RPMM beta value clustering     |               |                      |                       |
|--------------------------------|------------------|----------------------|-----------------------|--------------------------------|---------------|----------------------|-----------------------|
| CIMP vs. BRAF                  | non-CIMP-cluster | BRAF mutation absent | BRAF mutation Present | CIMP vs. BRAF                  | CIMP vs. BRAF | BRAF mutation absent | BRAF mutation Present |
|                                | CIMP-Cluster     | 126                  | 0                     |                                | not Cluster-8 | 143                  | 4                     |
|                                |                  | 28                   | 7                     |                                | Cluster-8*    | 11                   | 3                     |
|                                | Pvalue           | 0.00001              |                       |                                | Pvalue        | 0.0139               |                       |
| CIMP-cluster vs. CIMP-High     | non-CIMP-cluster | Not CIMP-High        | CIMP-High             | CIMP-cluster vs. CIMP-High     | not Cluster-5 | Not CIMP-High        | CIMP-High             |
|                                | CIMP-Cluster     | 123                  | 3                     |                                | Cluster-5*    | 129                  | 20                    |
|                                |                  | 6                    | 29                    |                                | 0             | 12                   |                       |
|                                | Pvalue           | 5.83E-07             |                       |                                | Pvalue        | 2.74E-06             |                       |
| CIMP-cluster vs. MLH1silencing | non-CIMP-cluster | no MLH1-silencing    | MLH1-silencing        | CIMP-cluster vs. MLH1silencing | not Cluster-5 | no MLH1-silencing    | MLH1-silencing        |
|                                | CIMP-Cluster     | 124                  | 2                     |                                | Cluster-5*    | 134                  | 15                    |
|                                |                  | 10                   | 25                    |                                | 0             | 12                   |                       |
|                                | Pvalue           | 8.65E-06             |                       |                                | Pvalue        | 1.68E-06             |                       |

\*The cluster with the highest enrichment of BRAF, CIMP-high and MLH1-silencing was selected  
None of the RPMM clusters captures the complete COAD-CIMP-High pattern, BRAF mutation and MLH1-silencing

### Acute Myeloid Leukemia (LAML)

| DM value clustering |                  |                      |                       | Beta value clustering |                  |                      |                       |
|---------------------|------------------|----------------------|-----------------------|-----------------------|------------------|----------------------|-----------------------|
| CIMP vs. IDHx       | non-CIMP-cluster | IDHx mutation absent | IDHx mutation present | CIMP vs. IDHx         | non-CIMP-cluster | IDHx mutation absent | IDHx mutation present |
|                     | CIMP-Cluster     | 136                  | 10                    |                       | CIMP-Cluster     | 151                  | 14                    |
|                     |                  | 19                   | 26                    |                       | 4                | 22                   |                       |
|                     | Pvalue           | 7.54E-06             |                       |                       | Pvalue           | 6.47E-06             |                       |

### Glioblastoma multiforme (GBM)

| DM value clustering |                  |          |      | Beta value clustering |               |          |      |
|---------------------|------------------|----------|------|-----------------------|---------------|----------|------|
| CIMP vs. IDHx       | non-CIMP-cluster | Not CIMP | CIMP | CIMP vs. IDHx         | not Cluster-5 | Not CIMP | CIMP |
|                     | CIMP-Cluster     | 207      | 5    |                       | Cluster-5     | 207      | 12   |
|                     |                  | 0        | 18   |                       | 0             | 11       |      |
|                     | Pvalue           | 8.42E-07 |      |                       | Pvalue        | 8.42E-07 |      |

## Supplementary Table 12

|      | DM value clustering     |                         | Gene expression clustering |                         |                     |      |
|------|-------------------------|-------------------------|----------------------------|-------------------------|---------------------|------|
|      | Intra-cluster consensus | Inter-Cluster consensus | Intra-cluster consensus    | Inter-Cluster consensus | Jaccard coefficient |      |
| BLCA | 80%                     | 8%                      | BLCA                       | 76%                     | 12%                 | 0.23 |
| BRCA | 89%                     | 4%                      | BRCA                       | 94%                     | 4%                  | 0.30 |
| COAD | 96%                     | 3%                      | COAD                       | 92%                     | 9%                  | 0.37 |
| GBM  | 89%                     | 5%                      | GBM                        | 72%                     | 13%                 | 0.24 |
| HNSC | 86%                     | 5%                      | HNSC                       | 77%                     | 5%                  | 0.23 |
| KIRC | 91%                     | 4%                      | KIRC                       | 76%                     | 9%                  | 0.25 |
| LAML | 89%                     | 8%                      | LAML                       | 71%                     | 15%                 | 0.28 |
| LUAD | 77%                     | 8%                      | LUAD                       | 81%                     | 9%                  | 0.22 |
| LUSC | 75%                     | 9%                      | LUSC                       | 77%                     | 11%                 | 0.25 |
| OV   | 93%                     | 4%                      | OV                         | 71%                     | 14%                 | 0.26 |
| READ | 65%                     | 12%                     | READ                       | 71%                     | 15%                 | 0.21 |
| UCEC | 91%                     | 3%                      | UCEC                       | 82%                     | 7%                  | 0.26 |

All green values correspond to clusterings where the DM value clustering is better than clustering gene expression values

This means higher consensus within a each cluster (=intra cluster consensus) and lower consensus for samples clustered in different clusters (=inter cluster consensus)

For both clusterings exactly the same number of clusters where compared for each cancer

The jaccard coefficient is the comparison fo the DM-value clustering and the gene expression clustering.





## Supplementary Table 14

### Pancancer cluster 1

| Geneset                                                                                                   | Pvalue   | FDR        | NrGeneOverlap | GeneOverlap                                                                                                                                                                                                                                                                                 |
|-----------------------------------------------------------------------------------------------------------|----------|------------|---------------|---------------------------------------------------------------------------------------------------------------------------------------------------------------------------------------------------------------------------------------------------------------------------------------------|
| REACTOME_GLUCAGON_TYPE_LIGAND_RECEPTORS                                                                   | 2.31E-07 | 6.67E-06   | 12            | ADCYAP1//GCGR//GHRH//GHRHR//GLP2R//GNG13//GNG4//GNG8//GNGT1//SCT//VIP//VIPR2                                                                                                                                                                                                                |
| Glucagon-type ligand receptors                                                                            | 2.31E-07 | 1.38E-05   | 12            | ADCYAP1//GCGR//GHRH//GHRHR//GLP2R//GNG13//GNG4//GNG8//GNGT1//SCT//VIP//VIPR2                                                                                                                                                                                                                |
| CARBONATE_DEHYDRATASE_ACTIVITY                                                                            | 3.47E-06 | 6.68E-05   | 7             | CA1//CA12//CA4//CA6//CA7//CA8//CA9                                                                                                                                                                                                                                                          |
| KEGG_TYROSINE_METABOLISM                                                                                  | 4.35E-06 | 4.54E-05   | 12            | ADH1A//ADH1B//ADH1C//ADH4//ADH6//ALDH3A1//DDC//HGD//TH//TPO//TYR//TYRP1                                                                                                                                                                                                                     |
| BIOCARTA_STEM_PATHWAY                                                                                     | 1.17E-05 | 0.0024544  | 7             | CSF2//CSF3//IL11//IL4//IL5//IL6//IL8<br>AKR1B10//AKR1C2//AKR1C4//APOA5//APOBEC1//APOC3//BAAT//BTNL3//CEL//CPNE6//CYP3A4//CYP3A5//CYP4F2//CYP4F3//CYP4F8//DHRS2//HNF4A//HPGD//HSD3B1//IL4//MTTP//NPC1L1//NROB2//NR1H4//NR1I2//PLA1A//PLA2G3//PPARGC1A//PTGES//RBP3//SHH//ST8SIA3//SULT2A1//S |
| LIPID_METABOLIC_PROCESS                                                                                   | 1.57E-05 | 0.00025237 | 39            | ULT2B1//TTPA//UGT1A1//UGT2B10//UGT2B15//UGT2B7<br>ADH1B//ADH4//ADH6//AKR1B10//AKR1C4//AKR7A3//ALDH3A1//DHRS2//GPD1//HPGD//HSD3B1                                                                                                                                                            |
| OXIDOREDUCTASE_ACTIVITY_GO_0016616                                                                        | 2.11E-05 | 0.0003309  | 13            | //HSD3B2//RDH8                                                                                                                                                                                                                                                                              |
| CHANNEL_REGULATOR_ACTIVITY                                                                                | 2.50E-05 | 0.0003865  | 8             | CHRNA7//KCNV1//NPY//NPY2R//PDZD3//SGK2//TMPRSS3//TNNI3                                                                                                                                                                                                                                      |
| REGULATION_OF_BLOOD_PRESSURE                                                                              | 2.50E-05 | 0.00038154 | 8             | AGT//CALCA//CARTPT//CHGA//GCGR//NPPA//REN//UTS2                                                                                                                                                                                                                                             |
| REACTOME_REGULATION_OF_INSULIN_LIKE_GROWTH_FACTOR_ACTIVITY_BY_INSULIN_LIKE_GROWTH_FACTOR_BINDING_PROTEINS | 3.18E-05 | 0.00045855 | 7             | F2//IGF2//IGFALS//IGFBP1//KLK3//MMP1//PLG                                                                                                                                                                                                                                                   |
| Regulation of Insulin-like Growth Factor (IGF) Activity by Insulin-lik                                    | 3.18E-05 | 0.0011757  | 7             | F2//IGF2//IGFALS//IGFBP1//KLK3//MMP1//PLG                                                                                                                                                                                                                                                   |
| SERINE_TYPE_PEPTIDASE_ACTIVITY                                                                            | 3.43E-05 | 0.00049887 | 11            | ACR//F11//F2//F7//KLK1//KLK8//PCSK9//PLG//PRSS1//PRSS3//TMPRSS6                                                                                                                                                                                                                             |
| Digestion of dietary carbohydrate                                                                         | 3.74E-05 | 0.0013367  | 5             | AMY1A//AMY2A//LCT//SI//TREH                                                                                                                                                                                                                                                                 |
| SERINE_HYDROLASE_ACTIVITY                                                                                 | 4.33E-05 | 0.00061426 | 11            | ACR//F11//F2//F7//KLK1//KLK8//PCSK9//PLG//PRSS1//PRSS3//TMPRSS6<br>FGF10//FOXA2//FOXA3//HNF1A//HNF1B//HNF4A//HNF4G//IAPP//INSM1//NEUROD1//NEUROG3                                                                                                                                           |
| REACTOME_REGULATION_OF_BETA_CELL_DEVELOPMENT                                                              | 4.79E-05 | 0.00066475 | 19            | //NKX2-2//ONCUT3//PDX1//PKLR//PTF1A//RPL21//RPS28//RPS4Y1                                                                                                                                                                                                                                   |
| AUXILIARY_TRANSPORT_PROTEIN_ACTIVITY                                                                      | 5.16E-05 | 0.00069811 | 8             | CHRNA7//KCNV1//NPY//NPY2R//PDZD3//SGK2//TMPRSS3//TNNI3                                                                                                                                                                                                                                      |
| WOUND_HEALING                                                                                             | 5.67E-05 | 0.00075086 | 12            | APOA5//C4BPB//EREG//F2//F7//GP9//HNF4A//KLK8//KNG1//PF4//PLG//TMPRSS6<br>ADH1B//ADH4//ADH6//AKR1B10//AKR1C4//AKR7A3//ALDH3A1//DHRS2//GPD1//HPGD//HSD3B1                                                                                                                                     |
| OXIDOREDUCTASE_ACTIVITY__ACTING_ON_CH_OH_GROUP_OF_DONORS                                                  | 6.63E-05 | 0.00086747 | 13            | //HSD3B2//RDH8                                                                                                                                                                                                                                                                              |

### Pancancer cluster 2

| Geneset                                                   | Pvalue   | FDR        | NrGeneOverlap | GeneOverlap                                                                                                                                       |
|-----------------------------------------------------------|----------|------------|---------------|---------------------------------------------------------------------------------------------------------------------------------------------------|
| AMINE_TRANSMEMBRANE_TRANSPORTER_ACTIVITY                  | 9.40E-07 | 1.25E-05   | 14            | OCA2//PDPN//SLC18A3//SLC1A6//SLC1A7//SLC22A3//SLC5A7//SLC6A14//SLC6A2//SLC6A3//SLC6A4//SLC7A10//SLC7A2//SLC7A4                                    |
| MALE_GONAD_DEVELOPMENT                                    | 7.81E-06 | 9.08E-05   | 7             | ANKRD7//DMRT1//DMRT2//LHB//NR5A1//SOX15//SRD5A2<br>COL10A1//COL11A1//COL17A1//COL1A1//COL2A1//COL4A3//COL4A6//COL7A1//COL8A1//COL9                |
| syndecan_1_pathway                                        | 2.38E-05 | 0.0048862  | 13            | A3//MET//MMP1//MMP7                                                                                                                               |
| G_PROTEIN_SIGNALING__ADENYLATE_CYCLASE_ACTIVATING_PATHWAY | 5.26E-05 | 0.00053248 | 9             | ADCYAP1//ADRB3//CALCA//CALCR//CRHR1//DRD1//DRD5//GLP1R//PTHLH<br>COL11A1//COL1A1//COL2A1//COL4A3//COL4A6//COL7A1//FGA//FGB//FGG//ITGA8//LAMA1//LA |
| integrin1_pathway                                         | 9.46E-05 | 0.0096978  | 15            | MA3//LAMB3//LAMC2//SPP1                                                                                                                           |

### Pancancer cluster 3

| Geneset | Pvalue | FDR | NrGeneOverlap | GeneOverlap |
|---------|--------|-----|---------------|-------------|
|---------|--------|-----|---------------|-------------|

|                                             |          |            |    |                                                                                                                                                                                                                                                                                                                                              |
|---------------------------------------------|----------|------------|----|----------------------------------------------------------------------------------------------------------------------------------------------------------------------------------------------------------------------------------------------------------------------------------------------------------------------------------------------|
| IMMUNE_SYSTEM_PROCESS                       | 1.54E-10 | 4.67E-09   | 51 | AZU1//CALCA//CCL18//CCL19//CCL20//CCL21//CCL23//CCL24//CCL25//CCL26//CCR8//CCR9//CD79A//CEACAM8//CHST4//CNR2//CTS5//CTSG//CXCL13//DMBT1//EREG//FCAR//HAMP//IL12B//IL17A//IL2//IL21//IL27//IL29//IL31RA//IL6//IL8//INHA//KIR2DL1//KIR2DL3//LTF//MADCAM1//MNX1//MS4A1//MS4A2//NCR1//OPRK1//PAX5//PF4//SAA1//SFTPD//SPACA3//SPINK5//TBX1//TRAT1 |
| IMMUNE_RESPONSE                             | 2.74E-09 | 6.43E-08   | 39 | D//SPINK5//TRAT1<br>PLA2G10//PLA2G12B//PLA2G1B//PLA2G2A//PLA2G2C//PLA2G2D//PLA2G2F//PLA2G3//PLA2G4E//PLA2G5//PPAP2C                                                                                                                                                                                                                          |
| KEGG_ETHER_LIPID_METABOLISM                 | 1.59E-06 | 2.08E-05   | 11 | 9 CLDN1//CLDN10//CLDN18//CLDN2//CLDN3//CLDN4//CLDN6//CLDN8//CLDN9                                                                                                                                                                                                                                                                            |
| CALCIUM_INDEPENDENT_CELL_CELL_ADHESION      | 1.99E-06 | 3.01E-05   | 9  | 9 CALCA//CNTN4//EREG//GPR98//INHA//PF4//SHH//TWIST2//ZBTB16                                                                                                                                                                                                                                                                                  |
| NEGATIVE_REGULATION_OF_CELL_DIFFERENTIATION | 2.01E-05 | 0.00025058 | 23 | ALOX15B//BNIPL//BTG4//CCL23//CCL3L3//COL4A3//CXCL1//EREG//FABP6//FGFBP1//IL1A//IL29//IL6//IL8//KRT4//MYO16//NOX4//RERG//SFTPD//SSTR1//SSTR3//TBX5//TM4SF4                                                                                                                                                                                    |
| NEGATIVE_REGULATION_OF_CELL_PROLIFERATION   | 3.06E-05 | 0.00036623 | 11 | 11 C4BPB//CYP2C18//FOXA1//FOXA2//FOXA3//SCGB1A1//SFTPA1//SFTPA2//SFTPD//SHH//TFF1                                                                                                                                                                                                                                                            |
| hnf3apathway                                | 3.47E-05 | 0.0072061  | 9  | 9 CLDN1//CLDN10//CLDN18//CLDN2//CLDN3//CLDN4//CLDN6//CLDN8//CLDN9                                                                                                                                                                                                                                                                            |
| REACTOME_TIGHT_JUNCTION_INTERACTIONS        | 3.73E-05 | 0.00098973 | 9  | 9 CLDN1//CLDN10//CLDN18//CLDN2//CLDN3//CLDN4//CLDN6//CLDN8//CLDN9                                                                                                                                                                                                                                                                            |
| Tight junction interactions                 | 3.73E-05 | 0.0020041  | 14 | 9 CLDN1//CLDN10//CLDN18//CLDN2//CLDN3//CLDN4//CLDN6//CLDN8//CLDN9<br>CRH//GRIA1//GRM5//PLA2G10//PLA2G12B//PLA2G1B//PLA2G2A//PLA2G2C//PLA2G2D//PLA2G2                                                                                                                                                                                         |
| KEGG_LONG_TERM_DEPRESSION                   | 3.97E-05 | 0.0004384  | 6  | 6 F//PLA2G3//PLA2G4E//PLA2G5//PRKG2                                                                                                                                                                                                                                                                                                          |
| PHOSPHOLIPASE_A2_ACTIVITY                   | 4.84E-05 | 0.0005563  | 9  | 9 CLDN1//CLDN10//CLDN18//CLDN2//CLDN3//CLDN4//CLDN6//CLDN8//CLDN9                                                                                                                                                                                                                                                                            |
| TIGHT_JUNCTION                              | 4.99E-05 | 0.00056219 | 11 | 11 COL17A1//EGF//EGFR//IL1A//LAMA3//LAMB3//LAMC2//MET//MST1R//RXRG//SFN                                                                                                                                                                                                                                                                      |
| a6b1_a6b4_integrin_pathway                  | 5.42E-05 | 0.0056244  | 12 | 12 NT9B                                                                                                                                                                                                                                                                                                                                      |
| KEGG_BASAL_CELL_CARCINOMA                   | 6.62E-05 | 0.00063374 | 16 | 16 D//SHH//TBX5//WNT1                                                                                                                                                                                                                                                                                                                        |
| CELL_MIGRATION                              | 9.50E-05 | 0.001011   | 16 | 16 D//SHH//TBX5//WNT1                                                                                                                                                                                                                                                                                                                        |

## Pancancer cluster 4

| Geneset                                                                                        | Pvalue   | FDR      | NrGeneOverlap | GeneOverlap                                                                                                                                                                                                                                                                                                                                                                                                     |
|------------------------------------------------------------------------------------------------|----------|----------|---------------|-----------------------------------------------------------------------------------------------------------------------------------------------------------------------------------------------------------------------------------------------------------------------------------------------------------------------------------------------------------------------------------------------------------------|
| GABA A receptor activation                                                                     | 8.91E-11 | 5.96E-09 | 10            | GABRA1//GABRA2//GABRA3//GABRA4//GABRA5//GABRB1//GABRB2//GABRB3//GABRG2//GABRG3                                                                                                                                                                                                                                                                                                                                  |
| REACTOME_NEURORANSMITTER_RECEPTOR_BINDING_AND_DOWNSTREAM_TRANSMISSION_IN_THE_POSTSYNAPTIC_CELL | 8.98E-11 | 4.93E-09 | 25            | GRIN2B//NEFL//PRKCG                                                                                                                                                                                                                                                                                                                                                                                             |
| Neurotransmitter Release Cycle                                                                 | 2.69E-08 | 1.44E-06 | 14            | CHAT//GAD1//GAD2//RIMS1//SLC18A3//SLC1A6//SLC1A7//SLC32A1//SLC6A11//SLC6A13//SNAP25//SYN2//SYN3//SYT1                                                                                                                                                                                                                                                                                                           |
| Developmental Biology                                                                          | 3.99E-07 | 2.03E-05 | 56            | ANGPTL4//CACNA1G//CACNA1S//CDH15//CDH2//CDH4//CER1//CHL1//CNTN1//CNTN2//CNTN6//COL2A1//COL9A1//COL9A3//CTNNA2//DCC//DCX//DPYSL5//EGFR//GCK//GDF1//HNF4G//INSM1//KCNQ2//KCNQ3//L1CAM//LAMA1//LEFTY1//LEFTY2//MAFA//MYOG//NCAN//NEUROD1//NEUROG3//NKX2-2//NKX6-1//NRCAM//NTN3//ONECUT1//PAK3//PAK7//PLIN1//PPARGC1A//PSPN//ROBO2//SCN1A//SCN2A//SCN2B//SCN7A//SEMA3E//SH3GL2//ST8SIA2//TRPC5//TRPC7//UNC5A//UNC5D |
| VOLTAGE_GATED_CALCIUM_CHANNEL_ACTIVITY                                                         | 6.54E-07 | 1.15E-05 | 9             | 9 5                                                                                                                                                                                                                                                                                                                                                                                                             |
| REACTOME_ADHERENS_JUNCTIONS_INTERACTIONS                                                       | 1.14E-06 | 4.38E-05 | 11            | 11 CADM2//CADM3//CDH10//CDH15//CDH18//CDH2//CDH4//CDH6//CDH7//CDH8//CDH9                                                                                                                                                                                                                                                                                                                                        |

|                                                                         |          |            |    |                                                                                                                                                                         |
|-------------------------------------------------------------------------|----------|------------|----|-------------------------------------------------------------------------------------------------------------------------------------------------------------------------|
| Adherens junctions interactions                                         | 1.14E-06 | 5.30E-05   | 11 | CADM2//CADM3//CDH10//CDH15//CDH18//CDH2//CDH4//CDH6//CDH7//CDH8//CDH9<br>CACNG2//CACNG3//CACNG4//CACNG8//CAMK2A//CAMK2B//GRIA1//GRIA2//GRIA3//GRIA4//PR                 |
| REACTOME_TRAFFICKING_OF_AMPA_RECEPTORS                                  | 1.69E-06 | 5.42E-05   | 11 | KCG                                                                                                                                                                     |
| Glutamate Binding, Activation of AMPA Receptors and Synaptic Plasticity | 1.69E-06 | 7.24E-05   | 11 | CACNG2//CACNG3//CACNG4//CACNG8//CAMK2A//CAMK2B//GRIA1//GRIA2//GRIA3//GRIA4//PR<br>KCG<br>CACNG2//CACNG3//CACNG4//CACNG8//CAMK2A//CAMK2B//GRIA1//GRIA2//GRIA3//GRIA4//PR |
| Trafficking of AMPA receptors                                           | 1.69E-06 | 6.96E-05   | 11 | KCG                                                                                                                                                                     |
| REACTOME_ACTIVATION_OF_NMDA_RECEPTOR_UPON_GLU                           | 1.85E-06 | 5.08E-05   | 12 | ACTN2//ADCY8//CAMK2A//CAMK2B//GRIA1//GRIA2//GRIA3//GRIA4//GRIN1//GRIN2A//GRIN2B/<br>/NEFL                                                                               |
| AMATE_BINDING_AND_POSTSYNAPTIC_EVENTS                                   | 1.85E-06 | 5.08E-05   | 12 | ACTN2//ADCY8//CAMK2A//CAMK2B//GRIA1//GRIA2//GRIA3//GRIA4//GRIN1//GRIN2A//GRIN2B/<br>/NEFL                                                                               |
| Activation of NMDA receptor upon glutamate binding and postsynaptic ev  | 2.58E-06 | 9.84E-05   | 12 | NEFL                                                                                                                                                                    |
| ACETYLCHOLINE_BINDING                                                   | 5.01E-06 | 8.13E-05   | 8  | CHRM1//CHRM2//CHRM3//CHRNA1//CHRNA2//CHRNA4//CHRNA6//CHRNA7                                                                                                             |
| REACTOME_NEUROTRANSMITTER_RELEASE_CYCLE                                 | 6.65E-06 | 0.00015978 | 10 | CHAT//RIMS1//SLC18A3//SLC1A6//SLC1A7//SNAP25//SYN2//SYN3//SYT1//TPH1                                                                                                    |
| GABA synthesis, release, reuptake and degradation                       | 1.38E-05 | 0.00046215 | 8  | GAD1//GAD2//RIMS1//SLC32A1//SLC6A11//SLC6A13//SNAP25//SYT1                                                                                                              |
| Activation of AMPA receptors                                            | 1.89E-05 | 0.00061195 | 4  | GRIA1//GRIA2//GRIA3//GRIA4<br>ALK//DLX2//DMBX1//DSCAML1//FOXG1//MYO16//NKX2-                                                                                            |
| BRAIN_DEVELOPMENT                                                       | 1.92E-05 | 0.00029252 | 13 | 2//OTX2//ROBO2//SIX3//TBR1//ZIC1//ZIC2                                                                                                                                  |
| KEGG_ARRHYTHMOGENIC_RIGHT_VENTRICULAR_CARDIOMY                          | 2.09E-05 | 0.00068333 | 16 | CNG7//CACNG8//CDH2//CTNNA2//CTNNA3//DES//SGCG                                                                                                                           |
| OPATHY_ARVC                                                             | 2.16E-05 | 0.00032165 | 7  | CACNA1B//CACNA1E//CACNA1G//CACNA1S//CACNA2D1//CACNG1//CACNG2                                                                                                            |
| VOLTAGE_GATED_CALCIUM_CHANNEL_COMPLEX                                   | 2.16E-05 | 0.00067918 | 7  | ACTN2//CAMK2A//CAMK2B//GRIN1//GRIN2A//GRIN2B//NEFL                                                                                                                      |
| CREB phosphorylation through the activation of CaMKII                   | 2.16E-05 | 0.00067918 | 10 | CACNA1B//CACNA1E//CACNA1G//CACNA1S//CACNA2D1//CACNG1//CACNG2//CACNG4//CACNG<br>5//TRPC5                                                                                 |
| CALCIUM_CHANNEL_ACTIVITY                                                | 3.46E-05 | 0.00048733 | 7  | ACTN2//CAMK2A//CAMK2B//GRIN1//GRIN2A//GRIN2B//NEFL                                                                                                                      |
| REACTOME_CREB_PHOSPHORYLATION_THROUGH_THE_ACTIV                         | 3.62E-05 | 0.00081816 | 7  | ACTN2//CAMK2A//CAMK2B//GRIN1//GRIN2A//GRIN2B//NEFL                                                                                                                      |
| ATION_OF_CAMKII                                                         | 3.62E-05 | 0.00081816 | 7  | ACTN2//CAMK2A//CAMK2B//GRIN1//GRIN2A//GRIN2B//NEFL                                                                                                                      |
| G_PROTEIN_SIGNALING__COUPLED_TO_IP3_SECOND_MESSE                        | 4.99E-05 | 0.00067977 | 11 | CCKAR//CCKBR//CHRM1//CHRM2//DRD1//DRD2//EGFR//GAP43//GRM5//NMBR//NMUR2                                                                                                  |
| NGER__PHOSPHOLIPASE_C_ACTIVATING                                        | 5.34E-05 | 0.00071296 | 6  | CARTPT//HRH3//NLGN1//RIMS1//SYN3//SYT1                                                                                                                                  |
| NEUROTRANSMITTER_SECRETION                                              | 5.80E-05 | 0.0015911  | 7  | ACTN2//CAMK2A//CAMK2B//GRIN1//GRIN2A//GRIN2B//NEFL                                                                                                                      |
| Ras activation upon Ca2+ influx through NMDA receptor                   | 7.07E-05 | 0.015383   | 8  | CNGA3//GRK1//GUCA1A//GUCY2F//LRAT//PDE6H//RPE65//SLC24A2                                                                                                                |
| cone_pathway                                                            | 7.07E-05 | 0.015383   | 8  | CNGA3//GRK1//GUCA1A//GUCY2F//LRAT//PDE6H//RPE65//SLC24A2                                                                                                                |
| REACTOME_RAS_ACTIVATION_UOPN_CA2+_INFUX_THROUGH                         | 8.95E-05 | 0.0018109  | 7  | ACTN2//CAMK2A//CAMK2B//GRIN1//GRIN2A//GRIN2B//NEFL                                                                                                                      |
| _NMDA_RECEPTOR                                                          | 8.95E-05 | 0.0018109  | 7  | ACTN2//CAMK2A//CAMK2B//GRIN1//GRIN2A//GRIN2B//NEFL                                                                                                                      |

## Pancancer cluster 5

| Geneset                     | Pvalue   | FDR      | NrGeneOverlap | GeneOverlap                                                                                                                                                                                                                                                                                                                                                                                                                                                                               |
|-----------------------------|----------|----------|---------------|-------------------------------------------------------------------------------------------------------------------------------------------------------------------------------------------------------------------------------------------------------------------------------------------------------------------------------------------------------------------------------------------------------------------------------------------------------------------------------------------|
| KEGG_OLFACTORY_TRANSDUCTION | 9.68E-12 | 5.59E-10 | 50            | CALML6//GUCY2D//OR10AD1//OR10G2//OR10H1//OR10H2//OR10H5//OR11H4//OR13A1//OR1<br>3D1//OR141//OR1G1//OR1J1//OR1J4//OR1K1//OR1L8//OR1N1//OR1Q1//OR2AE1//OR2AG2//O<br>R2B11//OR2B2//OR2B6//OR2C1//OR2C3//OR2H2//OR2K2//OR2L13//OR2L2//OR2T33//OR2T8//<br>OR2W3//OR3A1//OR3A2//OR51B4//OR51B5//OR51Q1//OR52B6//OR52K2//OR52N2//OR52N4//<br>OR52W1//OR56B1//OR56B4//OR5C1//OR5K2//OR7D2//OR9A4//PDC//PRKACG<br>GNG13//PRKACG//TAS1R1//TAS1R2//TAS2R10//TAS2R13//TAS2R19//TAS2R3//TAS2R31//TAS2R |
| KEGG_TASTE_TRANSDUCTION     | 3.75E-10 | 1.62E-08 | 16            | 4//TAS2R40//TAS2R42//TAS2R43//TAS2R46//TAS2R50//TAS2R60                                                                                                                                                                                                                                                                                                                                                                                                                                   |

|                                            |          |            |    |                                                                                                                                                                                                                                                                                                                                            |
|--------------------------------------------|----------|------------|----|--------------------------------------------------------------------------------------------------------------------------------------------------------------------------------------------------------------------------------------------------------------------------------------------------------------------------------------------|
| REACTOME_OLFACTORY_SIGNALING_PATHWAY       | 2.19E-09 | 1.00E-07   | 44 | OR10AD1//OR10G2//OR10H1//OR10H2//OR10H5//OR14I1//OR1F2P//OR1G1//OR1J1//OR1J4//OR1K1//OR1L8//OR1N1//OR1Q1//OR2AE1//OR2AG2//OR2B11//OR2B2//OR2B6//OR2C1//OR2C3//OR2H2//OR2K2//OR2L13//OR2L2//OR2T33//OR2T8//OR2W3//OR3A1//OR3A2//OR4F29//OR51B4//OR51B5//OR51Q1//OR52B6//OR52K2//OR52N2//OR52N4//OR52W1//OR56B1//OR56B4//OR5C1//OR5K2//OR9A4 |
| Olfactory Signaling Pathway                | 1.08E-08 | 1.76E-06   | 43 | OR10AD1//OR10G2//OR10H1//OR10H2//OR10H5//OR14I1//OR1G1//OR1J1//OR1J4//OR1K1//OR1L8//OR1N1//OR1Q1//OR2AE1//OR2AG2//OR2B11//OR2B2//OR2B6//OR2C1//OR2C3//OR2H2//OR2K2//OR2L13//OR2L2//OR2T33//OR2T8//OR2W3//OR3A1//OR3A2//OR51B4//OR51B5//OR51Q1//OR52B6//OR52K2//OR52N2//OR52N4//OR52W1//OR56B1//OR56B4//OR5C1//OR5K2//OR7D2//OR9A4          |
| TASTE_RECEPTOR_ACTIVITY                    | 1.41E-06 | 8.20E-05   | 7  | TAS1R1//TAS1R2//TAS2R10//TAS2R13//TAS2R3//TAS2R4//TAS2R43                                                                                                                                                                                                                                                                                  |
| REACTOME_TRANSCRIPTION                     | 2.60E-06 | 8.23E-05   | 24 | H2AFB1//HIST1H2AD//HIST1H2BB//HIST1H2BF//HIST1H2BI//HIST1H2BL//HIST1H2BM//HIST1H2BO//HIST1H3A//HIST1H3B//HIST1H3C//HIST1H3F//HIST1H3I//HIST1H3J//HIST1H4A//HIST1H4B//HIST1H4C//HIST1H4D//HIST1H4F//HIST1H4I//HIST1H4K//HIST1H4L//HIST2H3C//HIST2H3D                                                                                        |
| Relaxin receptors                          | 7.91E-06 | 0.00060333 | 5  | INSL5//RLN3//RXFP1//RXFP2//RXFP4                                                                                                                                                                                                                                                                                                           |
| Chromosome Maintenance                     | 4.60E-05 | 0.0027681  | 15 | FKBP6//H2AFB1//HIST1H2AD//HIST1H2AJ//HIST1H2BB//HIST1H2BL//HIST1H2BM//HIST1H2BO//HIST1H4A//HIST3H3//SMC1B//SYCP2//SYCP3//TERT//TEX12                                                                                                                                                                                                       |
| SENSORY_PERCEPTION_OF_TASTE                | 5.85E-05 | 0.0020577  | 5  | TAS1R1//TAS1R2//TAS2R3//TAS2R4//TAS2R43                                                                                                                                                                                                                                                                                                    |
| REGULATION_OF_IMMUNE_RESPONSE              | 6.78E-05 | 0.0022662  | 8  | CD79A//EREG//IFNK//IL29//IL4//KRT1//NCR1//TRAT1                                                                                                                                                                                                                                                                                            |
| REACTOME_RNA_POLYMERASE_I_CHAIN_ELONGATION | 8.53E-05 | 0.0025026  | 8  | HIST1H3A//HIST1H3B//HIST1H3C//HIST1H3F//HIST1H3I//HIST1H3J//HIST2H3C//HIST2H3D                                                                                                                                                                                                                                                             |

## Pancancer cluster 6

| Geneset                                                                | Pvalue   | FDR        | NrGeneOverlap | GeneOverlap                                                                                                                                                                    |
|------------------------------------------------------------------------|----------|------------|---------------|--------------------------------------------------------------------------------------------------------------------------------------------------------------------------------|
| Orexin and neuropeptides FF and QRFP bind to their respective receptor | 4.19E-06 | 0.00020056 | 6             | HCRT//HCRTR1//HCRTR2//NPFFR1//NPFFR2//QRFP                                                                                                                                     |
| GAMETE_GENERATION                                                      | 8.61E-06 | 0.00015299 | 23            | BCL2L10//BMPR1B//CCNA1//DDX25//DNAH9//DNAJB13//FOXJ1//FSHR//HIST1H1A//HIST1H1T//LEFTY2//MORC1//NME5//PROK2//SERPINA5//SPAG11B//SPATA4//SYCP1//VCX1//VCX3A//VCX3B//WFDCC2//YBX2 |
| SULFOTRANSFERASE_ACTIVITY                                              | 1.35E-05 | 0.00022751 | 10            | CHST4//CHST5//CHST6//CHST8//CHST9//GAL3ST1//GAL3ST2//HS3ST5//HS3ST6//SULT1C2                                                                                                   |
| TRANSFERASE_ACTIVITY__TRANSFERRING_SULFUR_CONTAINING_GROUPS            | 5.38E-05 | 0.00081247 | 10            | CHST4//CHST5//CHST6//CHST8//CHST9//GAL3ST1//GAL3ST2//HS3ST5//HS3ST6//SULT1C2                                                                                                   |

## Pancancer cluster 7

| Geneset                                             | Pvalue   | FDR      | NrGeneOverlap | GeneOverlap                                                                                                                                                                                                                                                                                                                                                                                                                                                                                                                                                                                                                                                                                                                                                                                                                                                                                                                                                                                                                                                                                                                                                                                                                                                       |
|-----------------------------------------------------|----------|----------|---------------|-------------------------------------------------------------------------------------------------------------------------------------------------------------------------------------------------------------------------------------------------------------------------------------------------------------------------------------------------------------------------------------------------------------------------------------------------------------------------------------------------------------------------------------------------------------------------------------------------------------------------------------------------------------------------------------------------------------------------------------------------------------------------------------------------------------------------------------------------------------------------------------------------------------------------------------------------------------------------------------------------------------------------------------------------------------------------------------------------------------------------------------------------------------------------------------------------------------------------------------------------------------------|
| MEMBRANE_FRACTION                                   | 2.05E-09 | 6.48E-08 | 52            | A4GNT//ADAM18//ADCY8//APOB//CA4//CD70//CEACAM4//CYP2C9//CYP3A4//CYP3A5//CYP4A11//DCT//DSCAM//FMO3//FOLR1//GAL3ST1//GCNT3//GYPA//HSD17B3//HSD3B2//HTRA4//MAL//MCF2//MLC1//NOS1//PDZD3//SIGLEC6//SLC12A1//SLC12A3//SLC13A2//SLC15A1//SLC17A1//SLC17A2//SLC17A3//SLC17A4//SLC17A5//SLC17A6//SLC17A7//SLC17A8//SLC17A9//SLC17A10//SLC17A11//SLC17A12//SLC17A13//SLC17A14//SLC17A15//SLC17A16//SLC17A17//SLC17A18//SLC17A19//SLC17A20//SLC17A21//SLC17A22//SLC17A23//SLC17A24//SLC17A25//SLC17A26//SLC17A27//SLC17A28//SLC17A29//SLC17A30//SLC17A31//SLC17A32//SLC17A33//SLC17A34//SLC17A35//SLC17A36//SLC17A37//SLC17A38//SLC17A39//SLC17A40//SLC17A41//SLC17A42//SLC17A43//SLC17A44//SLC17A45//SLC17A46//SLC17A47//SLC17A48//SLC17A49//SLC17A50//SLC17A51//SLC17A52//SLC17A53//SLC17A54//SLC17A55//SLC17A56//SLC17A57//SLC17A58//SLC17A59//SLC17A60//SLC17A61//SLC17A62//SLC17A63//SLC17A64//SLC17A65//SLC17A66//SLC17A67//SLC17A68//SLC17A69//SLC17A70//SLC17A71//SLC17A72//SLC17A73//SLC17A74//SLC17A75//SLC17A76//SLC17A77//SLC17A78//SLC17A79//SLC17A80//SLC17A81//SLC17A82//SLC17A83//SLC17A84//SLC17A85//SLC17A86//SLC17A87//SLC17A88//SLC17A89//SLC17A90//SLC17A91//SLC17A92//SLC17A93//SLC17A94//SLC17A95//SLC17A96//SLC17A97//SLC17A98//SLC17A99//SLC17A100 |
| SECONDARY_ACTIVE_TRANSMEMBRANE_TRANSPORTER_ACTIVITY | 1.19E-07 | 2.87E-06 | 15            | LC22A7//SLC4A4//SLC5A1//SLC5A2//SLC5A7//SLC9A3                                                                                                                                                                                                                                                                                                                                                                                                                                                                                                                                                                                                                                                                                                                                                                                                                                                                                                                                                                                                                                                                                                                                                                                                                    |
| SYMPORTER_ACTIVITY                                  | 1.98E-07 | 4.66E-06 | 12            | SLC10A2//SLC12A1//SLC12A3//SLC13A2//SLC15A1//SLC17A2//SLC17A3//SLC17A4//SLC17A5//SLC17A6//SLC17A7//SLC17A8//SLC17A9//SLC17A10//SLC17A11//SLC17A12//SLC17A13//SLC17A14//SLC17A15//SLC17A16//SLC17A17//SLC17A18//SLC17A19//SLC17A20//SLC17A21//SLC17A22//SLC17A23//SLC17A24//SLC17A25//SLC17A26//SLC17A27//SLC17A28//SLC17A29//SLC17A30//SLC17A31//SLC17A32//SLC17A33//SLC17A34//SLC17A35//SLC17A36//SLC17A37//SLC17A38//SLC17A39//SLC17A40//SLC17A41//SLC17A42//SLC17A43//SLC17A44//SLC17A45//SLC17A46//SLC17A47//SLC17A48//SLC17A49//SLC17A50//SLC17A51//SLC17A52//SLC17A53//SLC17A54//SLC17A55//SLC17A56//SLC17A57//SLC17A58//SLC17A59//SLC17A60//SLC17A61//SLC17A62//SLC17A63//SLC17A64//SLC17A65//SLC17A66//SLC17A67//SLC17A68//SLC17A69//SLC17A70//SLC17A71//SLC17A72//SLC17A73//SLC17A74//SLC17A75//SLC17A76//SLC17A77//SLC17A78//SLC17A79//SLC17A80//SLC17A81//SLC17A82//SLC17A83//SLC17A84//SLC17A85//SLC17A86//SLC17A87//SLC17A88//SLC17A89//SLC17A90//SLC17A91//SLC17A92//SLC17A93//SLC17A94//SLC17A95//SLC17A96//SLC17A97//SLC17A98//SLC17A99//SLC17A100                                                                                                                                                                                                |
| KEGG_PORPHYRIN_AND_CHLOROPHYLL_METABOLISM           | 9.04E-07 | 1.05E-05 | 13            | 5A1//SLC5A2//SLC5A7                                                                                                                                                                                                                                                                                                                                                                                                                                                                                                                                                                                                                                                                                                                                                                                                                                                                                                                                                                                                                                                                                                                                                                                                                                               |

|                                                |          |            |                                                                                                                                                                                                                                                 |
|------------------------------------------------|----------|------------|-------------------------------------------------------------------------------------------------------------------------------------------------------------------------------------------------------------------------------------------------|
| KEGG_PPAR_SIGNALING_PATHWAY                    | 1.10E-06 | 1.18E-05   | ACADL//ACSL6//ANGPTL4//APOC3//AQP7//CYP4A11//CYP4A22//CYP7A1//CYP8B1//FABP1//FABP2//FABP4//FABP6//FABP7//HMGCS2//PCK1//PLIN1                                                                                                                    |
| Organic cation/anion/zwitterion transport      | 5.18E-06 | 0.00020975 | 7 SLC22A1//SLC22A11//SLC22A12//SLC22A2//SLC22A3//SLC22A7//SLC22A8                                                                                                                                                                               |
| BIOCARTA_INTRINSIC_PATHWAY                     | 6.18E-06 | 0.0012989  | 9 COL4A3//F11//F2//FGA//FGB//FGG//KLB1//KNG1//SERPINC1                                                                                                                                                                                          |
| REACTOME_COMMON_PATHWAY                        | 9.79E-06 | 0.00018706 | 7 F2//FGA//FGB//FGG//PF4//PF4V1//SERPINC1                                                                                                                                                                                                       |
| Common Pathway                                 | 9.79E-06 | 0.00038163 | 7 F2//FGA//FGB//FGG//PF4//PF4V1//SERPINC1                                                                                                                                                                                                       |
|                                                |          |            | ACOT12//AGXT//AKR1C1//AKR1C2//AKR1D1//ALDH1L1//ASPA//BAAT//BBOX1//CYP4A11//CYP4F2//DCT//FTCD//GAD2//GLDC//GLYAT//HAO1//HAO2//HGD//HPD//NR1H4//PAH//PPARGC1A//SL                                                                                 |
| CARBOXYLIC_ACID_METABOLIC_PROCESS              | 1.31E-05 | 0.00020709 | 27 C3A1//SLC7A2//SLC7A9//TYR                                                                                                                                                                                                                    |
|                                                |          |            | ACOT12//AGXT//AKR1C1//AKR1C2//AKR1D1//ALDH1L1//ASPA//BAAT//BBOX1//CYP4A11//CYP4F2//DCT//FTCD//GAD2//GLDC//GLYAT//HAO1//HAO2//HGD//HPD//NR1H4//PAH//PPARGC1A//SL                                                                                 |
| ORGANIC_ACID_METABOLIC_PROCESS                 | 1.62E-05 | 0.00025336 | 27 C3A1//SLC7A2//SLC7A9//TYR                                                                                                                                                                                                                    |
| BIOCARTA_AMI_PATHWAY                           | 1.70E-05 | 0.0017872  | 8 AHSP//COL4A3//F2//FGA//FGB//FGG//PLG//SERPINC1                                                                                                                                                                                                |
| REACTOME_STEROID_HORMONES                      | 2.59E-05 | 0.00040926 | 8 CUBN//CYP17A1//CYP21A2//CYP24A1//GC//HSD17B3//HSD3B2//LRP2                                                                                                                                                                                    |
| ANION_CATION_SYMPORTER_ACTIVITY                | 2.91E-05 | 0.00041196 | 7 SLC12A1//SLC12A3//SLC13A2//SLC17A2//SLC17A3//SLC17A4//SLC4A4                                                                                                                                                                                  |
| KEGG_RENIN_ANGIOTENSIN_SYSTEM                  | 4.68E-05 | 0.00040635 | 7 ACE2//AGT//AGTR1//CMA1//CPA3//CTSG//REN                                                                                                                                                                                                       |
|                                                |          |            | ABCG5//ACADL//AGT//AKR1C4//AKR1D1//ALB//AMN//ANGPTL4//APOB//APOC3//BAAT//CUBN//CYP17A1//CYP21A2//CYP4A11//CYP4A22//CYP7A1//CYP8B1//FABP4//FABP6//GPD1//HMGCS2//                                                                                 |
| REACTOME_METABOLISM_OF_LIPIDS_AND_LIPOPROTEINS | 5.25E-05 | 0.00073261 | 31 /HSD17B3//HSD3B2//LIPC//MTPP//NPC1L1//PLIN1//SLC10A2//SLC2A2//UGT1A9                                                                                                                                                                         |
|                                                |          |            | ABCG5//ACADL//ACSL6//AGT//AKR1C4//AKR1D1//ALB//AMN//ANGPTL4//ANKRD1//APOB//APOC3//BAAT//BCMO1//CUBN//CYP17A1//CYP21A2//CYP24A1//CYP4A11//CYP7A1//CYP8B1//ELOVL2//ENPP7//FABP1//FABP4//FABP6//GAL3ST1//GBA3//GC//GPD1//HMGCS2//HSD17B3//HSD3B2// |
| Metabolism of lipids and lipoproteins          | 5.50E-05 | 0.0018087  | 43 /LIPC//LRAT//LRP2//MTPP//NPC1L1//PLIN1//PPARGC1A//PRKAA2//SLC10A2//UGT1A9                                                                                                                                                                    |
| BIOCARTA_ACE2_PATHWAY                          | 7.76E-05 | 0.0054397  | 6 ACE2//AGT//AGTR1//CMA1//COL4A3//REN                                                                                                                                                                                                           |
| PHOSPHATE_TRANSMEMBRANE_TRANSPORTER_ACTIVITY   | 7.76E-05 | 0.00092395 | 6 SLC17A1//SLC17A2//SLC17A3//SLC17A4//SLC34A1//SLC34A2                                                                                                                                                                                          |
| Glyoxylate metabolism                          | 7.83E-05 | 0.0024252  | 4 AGXT//AGXT2//DAO//HAO1                                                                                                                                                                                                                        |
| Organic anion transport                        | 7.83E-05 | 0.0023559  | 4 SLC22A11//SLC22A12//SLC22A7//SLC22A8                                                                                                                                                                                                          |
|                                                |          |            | ACOT12//AGXT//AKR1C1//AKR1C2//AKR1D1//ALDH1L1//BAAT//BBOX1//CYP4A11//CYP4F2//FTC                                                                                                                                                                |
| MONOCARBOXYLIC_ACID_METABOLIC_PROCESS          | 8.32E-05 | 0.00097113 | 16 D//GLYAT//HAO1//HAO2//NR1H4//PPARGC1A                                                                                                                                                                                                        |
|                                                |          |            | ACTN2//ALB//EGF//FGA//FGB//FGG//FIGF//GP5//GP9//HRG//KNG1//PF4//PLG//PPBP//SCG3//T                                                                                                                                                              |
| REACTOME_PLATELET_DEGRANULATION                | 9.62E-05 | 0.001294   | 16 F                                                                                                                                                                                                                                            |

## Pancancer cluster 8

| Geneset                          | Pvalue   | FDR        | NrGeneOverlap | GeneOverlap                                                                                                                                                                                                      |
|----------------------------------|----------|------------|---------------|------------------------------------------------------------------------------------------------------------------------------------------------------------------------------------------------------------------|
| KEGG_JAK_STAT_SIGNALING_PATHWAY  | 2.41E-09 | 1.19E-07   | 32            | CBLC//CNTFR//CRLF2//CSF2//CSF3//EPO//IFNA1//IFNA13//IFNE//IFNG//IFNK//IL11//IL12B//IL13//IL13RA2//IL19//IL20//IL20RA//IL20RB//IL21//IL22RA1//IL22RA2//IL23R//IL24//IL26//IL28A//IL28B//IL29//IL6//LEP//TPO//TSLP |
| STRUCTURAL_CONSTITUENT_OF_MUSCLE | 2.49E-09 | 5.18E-08   | 14            | ACTC1//ACTN2//ACTN3//KRT19//MYBPC1//MYBPC2//MYBPC3//MYBPH//MYH6//MYH7//MYL2//MYL3//MYLPP//MYOT                                                                                                                   |
| RHYTHMIC_PROCESS                 | 7.46E-08 | 1.26E-06   | 12            | BMP1R1B//EREG//FOXL2//MTNR1A//OPN4//SPRR2A//SPRR2B//SPRR2C//SPRR2D//SPRR2E//SPRR2F//SPRR2G                                                                                                                       |
| CONTRACTILE_FIBER                | 1.23E-07 | 2.01E-06   | 11            | ABRA//ACTA1//DES//KRT19//MYBPC1//MYL3//MYLPP//MYOZ2//TNNC1//TNNI3//TNNT2                                                                                                                                         |
| CONTRACTILE_FIBER_PART           | 5.34E-07 | 8.17E-06   | 10            | ABRA//ACTA1//DES//KRT19//MYL3//MYLPP//MYOZ2//TNNC1//TNNI3//TNNT2                                                                                                                                                 |
| MYOFIBRIL                        | 8.21E-07 | 1.21E-05   | 9             | ABRA//ACTA1//DES//KRT19//MYBPC1//MYOZ2//TNNC1//TNNI3//TNNT2                                                                                                                                                      |
| REGULATION_OF_MUSCLE_CONTRACTION | 8.21E-07 | 1.19E-05   | 9             | KCNB2//MYBPC3//MYBPH//MYL2//NMU//PROK2//TNNC1//TNNC2//TNNT1                                                                                                                                                      |
| il23pathway                      | 1.66E-06 | 0.00034762 | 12            | ALOX12B//CXCL1//CXCL9//IFNG//IL12B//IL17A//IL17F//IL19//IL23R//IL24//IL6//NOS2                                                                                                                                   |

|                                                                        |          |            |                                                                                                                                                                                                                                                                                                                                                                                                   |
|------------------------------------------------------------------------|----------|------------|---------------------------------------------------------------------------------------------------------------------------------------------------------------------------------------------------------------------------------------------------------------------------------------------------------------------------------------------------------------------------------------------------|
| CALCIUM_ION_BINDING                                                    | 3.83E-06 | 5.25E-05   | ANXA10//CALB1//CALML3//COMP//DMP1//DNASE1L3//DUOX2//FLG//GPR98//HPCAL4//ITI1H1//20 MYL2//PRSS3//S100A12//S100A7//S100A8//S100A9//S100P//TGM3//THBS4                                                                                                                                                                                                                                               |
| HEART_DEVELOPMENT                                                      | 8.64E-06 | 0.00011698 | 11 BMP2//CASQ2//FGF12//GATA4//HAND2//IRX4//MYBPC3//MYH6//MYH7//SHOX2//TBX1                                                                                                                                                                                                                                                                                                                        |
| SARCOMERE                                                              | 9.25E-06 | 0.00012378 | 7 ABRA//ACTA1//DES//MYOZ2//TNNC1//TNNI3//TNNT2<br>AHSG//CD79A//CHRNA7//EREG//IFNK//IL12B//IL20//IL29//IL8//KLK8//KRT1//LEP//NCR1//SPINK                                                                                                                                                                                                                                                           |
| REGULATION_OF_RESPONSE_TO_STIMULUS                                     | 1.40E-05 | 0.0001848  | 14 5<br>ABRA//ACTA1//ACTC1//ACTL7B//ACTN2//ACTN3//BFSP2//CCNA1//CSTA//CTAG2//DNAI2//DSP//EPB41L4B//HAP1//IVL//KRT1//KRT15//KRT17//KRT19//KRT2//KRT3//KRT5//KRT6A//LOR//MYH6//MYH7//MYL2//MYL3//MYLPF//MYO18B//MYO3A//MYOT//NEFL//NEFM//PKP1//SCEL//SPRR1A//44 /SPRR1B//SPRR3//TGM1//TNNC1//TNNI3//TNNT2//USH1G<br>COL11A1//COL1A1//COL2A1//COL4A6//COL6A6//COMP//IBSP//ITGB6//LAMA1//LAMA3//LAMB3 |
| CYTOSKELETON                                                           | 1.61E-05 | 0.00021003 | 17 //LAMB4//LAMC2//RELN//SV2C//THBS4//TNN<br>6 BMPR1B//DMBX1//EREG//KLK8//RTN4RL1//SPINK5<br>CPA2//CPA3//ECEL1//FAP//MEP1A//MMP11//MMP12//MMP13//MMP16//MMP3//MMP8//PAP                                                                                                                                                                                                                           |
| KEGG_ECM_RECEPTOR_INTERACTION                                          | 1.70E-05 | 0.00016756 | 12 PA2                                                                                                                                                                                                                                                                                                                                                                                            |
| DEVELOPMENTAL_GROWTH                                                   | 2.22E-05 | 0.00028143 | 6 CHRNA1//CHRNA2//CHRNA6//CHRN4//CHRND//CHRNA                                                                                                                                                                                                                                                                                                                                                     |
| METALLOPEPTIDASE_ACTIVITY                                              | 2.59E-05 | 0.00030755 | 5 H19//IGF2//IGF2BP1//IGF2BP2//IGF2BP3                                                                                                                                                                                                                                                                                                                                                            |
| Presynaptic nicotinic acetylcholine receptors                          | 4.21E-05 | 0.0017042  | 8 DEFB1//EREG//IFNK//IL12B//KRT1//NCR1//PYDC1//SFTPD                                                                                                                                                                                                                                                                                                                                              |
| Binding of RNA by Insulin-like Growth Factor-2 mRNA Binding Proteins ( | 4.80E-05 | 0.0018079  | ANXA10//CA12//CALB1//CALML3//CBL3//COMP//DMP1//DNASE1L3//DUOX2//FLG//GDA//GPR9                                                                                                                                                                                                                                                                                                                    |
| INNATE_IMMUNE_RESPONSE                                                 | 5.24E-05 | 0.00059786 | 8//HPCAL4//ITI1H1//MMP1//MMP10//MMP12//MMP13//MMP16//MMP8//MYL2//PRSS3//S100                                                                                                                                                                                                                                                                                                                      |
| CATION_BINDING                                                         | 5.31E-05 | 0.00060016 | 29 A12//S100A7//S100A8//S100A9//S100P//TGM3//THBS4<br>ACTA1//CHRNA1//CSR3//FOXL2//GYLTL1B//KRT19//MUSK//MYBPC3//MYF6//MYH6//MYH7//M                                                                                                                                                                                                                                                               |
| MUSCLE_DEVELOPMENT                                                     | 5.80E-05 | 0.00064882 | 17 YOD1//MYOZ1//SGCA//SGCG//SIX1//TNNI3<br>ALX1//BNC1//DLX2//DLX3//DLX6//DMBX1//DMRT1//DMRT2//EHF//FOXA1//FOXD1//FOXD3//FO                                                                                                                                                                                                                                                                        |
| TRANSCRIPTION_FACTOR_ACTIVITY                                          | 6.16E-05 | 0.00068291 | 41 P2C//TRIM29//ZIC1<br>XE1//FOX3//FOX1//FOX2//GATA1//GBX2//HAND2//HOXC5//LMO1//LMX1B//MAFA//MYF6//MYO1//MYOG//NKX2-5//PAX3//PAX7//PITX2//POU3F1//POU3F2//POU4F3//POU6F2//RORB//SHOX//TBX1//TBX4//TFA                                                                                                                                                                                             |

## Pancancer cluster 9

| Geneset                                     | Pvalue   | FDR        | NrGeneOverlap | GeneOverlap                                                                                                                                                           |
|---------------------------------------------|----------|------------|---------------|-----------------------------------------------------------------------------------------------------------------------------------------------------------------------|
| FGFR2 ligand binding and activation         | 1.02E-05 | 0.0006119  | 8             | FGF17//FGF18//FGF20//FGF22//FGF23//FGF3//FGF8//FGF9                                                                                                                   |
| FGFR4 ligand binding and activation         | 1.22E-05 | 0.00065929 | 7             | FGF17//FGF18//FGF19//FGF20//FGF23//FGF8//FGF9                                                                                                                         |
| REACTOME_PHOSPHOLIPASE_C-MEDIATED_CASCADE   | 1.76E-05 | 0.00036998 | 9             | FGF17//FGF18//FGF19//FGF20//FGF22//FGF23//FGF3//FGF8//FGF9                                                                                                            |
| FGFR ligand binding and activation          | 1.76E-05 | 0.00090615 | 9             | FGF17//FGF18//FGF19//FGF20//FGF22//FGF23//FGF3//FGF8//FGF9                                                                                                            |
| Steroid hormones                            | 2.20E-05 | 0.0010837  | 10            | CGA//CUBN//CYP11A1//CYP17A1//CYP21A2//CYP24A1//HSD17B3//LHB//SRD5A2//STARD6<br>AMBIP//CST1//CST2//CST6//LPA//PI3//SERPINA4//SERPINA5//SERPINA6//SERPINB3//SERPINI2//S |
| PROTEASE_INHIBITOR_ACTIVITY                 | 2.24E-05 | 0.00039332 | 12            | PINK5                                                                                                                                                                 |
| FGFR1 ligand binding and activation         | 2.28E-05 | 0.0010297  | 7             | FGF17//FGF20//FGF22//FGF23//FGF3//FGF8//FGF9                                                                                                                          |
| FGFR3b ligand binding and activation        | 3.72E-05 | 0.0016085  | 5             | FGF17//FGF18//FGF20//FGF8//FGF9<br>BMPR1B//CALCA//CARTPT//CNTN4//GPR98//IL20//IL4//INHA//NANOG//PF4//SHH//SPINK5//TW                                                  |
| REGULATION_OF_CELL_DIFFERENTIATION          | 6.39E-05 | 0.00097145 | 14            | IST2//VWC2                                                                                                                                                            |
| REACTOME_SHCMEDIATED_CASCADE                | 6.55E-05 | 0.0012399  | 8             | FGF17//FGF18//FGF20//FGF22//FGF23//FGF3//FGF8//FGF9                                                                                                                   |
| REACTOME_FGFR_LIGAND_BINDING_AND_ACTIVATION | 7.73E-05 | 0.0013941  | 9             | FGF17//FGF18//FGF19//FGF20//FGF22//FGF23//FGF3//FGF8//FGF9                                                                                                            |
| REACTOME_FRS2MEDIATED_CASCADE               | 7.73E-05 | 0.0013307  | 9             | FGF17//FGF18//FGF19//FGF20//FGF22//FGF23//FGF3//FGF8//FGF9                                                                                                            |

|                                      |          |           |                                                                                                                                |
|--------------------------------------|----------|-----------|--------------------------------------------------------------------------------------------------------------------------------|
| FGFR3 ligand binding and activation  | 9.14E-05 | 0.0031911 | 6 FGF17//FGF18//FGF20//FGF23//FGF8//FGF9                                                                                       |
| FGFR3c ligand binding and activation | 9.14E-05 | 0.0030914 | 6 FGF17//FGF18//FGF20//FGF23//FGF8//FGF9<br>AMBP//APOA2//CABP1//CST1//CST2//CST6//LPA//PI3//PPP1R1A//PPP1R1B//PTN//SAG//SERPIN |
| ENZYME_INHIBITOR_ACTIVITY            | 9.72E-05 | 0.0014446 | 21 A4//SERPINA5//SERPINA6//SERPINB3//SERPINI2//SFN//SNCB//SPINK5//TESC                                                         |

## Pancancer cluster 10

| Geneset                                                       | Pvalue   | FDR        | NrGeneOverlap | GeneOverlap                                                       |
|---------------------------------------------------------------|----------|------------|---------------|-------------------------------------------------------------------|
| SODIUM_ION_TRANSPORT                                          | 4.22E-06 | 8.33E-05   | 8             | ATP1A4//SCN10A//SCN2A//SCN2B//SCN4A//SCN7A//SCNN1A//SCNN1G        |
| HORMONE_METABOLIC_PROCESS                                     | 1.82E-05 | 0.00031927 | 9             | AKR1D1//CHST8//CHST9//CYP11A1//DHRS2//DIO1//DIO2//UGT2B11//UGT2B4 |
| DETECTION_OF_ABIOTIC_STIMULUS                                 | 2.22E-05 | 0.00038461 | 7             | ABCA4//GRM6//NPFPR2//OPN4//RP1//SAG//TAC1                         |
| G_PROTEIN_SIGNALING__ADENYLATE_CYCLASE_INHIBITING_P<br>ATHWAY | 6.22E-05 | 0.00099318 | 5             | DRD2//GRM4//MCHR1//NPY1R//NPY2R                                   |
| REGULATION_OF_NEUROTRANSMITTER_LEVELS                         | 9.08E-05 | 0.0013482  | 7             | CARTPT//GRM4//RIMS1//SLC5A7//SLC6A4//SYN3//SYT1                   |
